# Supplementary material for: Aniline assisted dimerization of phenylalanines: convenient synthesis of 2-aroyl-3-arylquinoline in an I2-DMSO system
Source: Royal Society of Chemistry journal article supplement (doi:10.1039/d2ob02283d), 2023-01-01

*Supporting Information*

**Aniline Assisted Dimerization of Phenylalanines: Convenient Synthesis of 2-Aroyl-3-arylquinoline in I<sub>2</sub>-DMSO System**

Jin-Tian Ma<sup>a</sup>, Ting Chen<sup>a</sup>, Xiang-Long Chen<sup>a</sup>, You Zhou<sup>a</sup>, Zhi-Cheng Yu<sup>a</sup>, Shi-Yi

Zhuang<sup>a</sup>, Yan-Dong Wu<sup>a</sup>, Jia-Chen Xiang<sup>\*b</sup> and An-Xin Wu<sup>\*a</sup>

<sup>a</sup>*Key Laboratory of Pesticide & Chemical Biology, Ministry of Education, College of Chemistry,*

*Central China Normal University, Wuhan 430079, P. R. China.*

<sup>b</sup>*School of Chemistry and Chemical Engineering, Southeast University, Nanjing 211189, China.*

*Email: chwuax@mail.ccnu.edu.cn*

*Email: xiangjiachen@seu.edu.cn*

| <b>Table of Contents</b>                                                                                      | <b>page</b> |
|---------------------------------------------------------------------------------------------------------------|-------------|
| 1. General.....                                                                                               | S2          |
| 2. General procedure for the synthesis of <b>3</b> .....                                                      | S2          |
| 3. Mechanism studies.....                                                                                     | S3          |
| 4. Characterization data for compounds <b>3</b> and <b>5ah</b> .....                                          | S4-S17      |
| 5. References.....                                                                                            | S17         |
| 6. Crystallographic data and molecular structure of <b>3v</b> .....                                           | S18-S19     |
| 7. HRMS spectra for compounds <b>3</b> and <b>5ah</b> .....                                                   | S20-S31     |
| 8. <sup>1</sup> H, <sup>13</sup> C and <sup>19</sup> F NMR spectra of compounds <b>3</b> and <b>5ah</b> ..... | S32-S67     |

## 1. General

All other substrates and reagents were commercially available and used without further purification. TLC analysis was performed using pre-coated glass plates. Column chromatography was performed using silica gel (200–300 mesh).  $^1\text{H}$  spectra were recorded in  $\text{CDCl}_3/\text{DMSO-d}_6$  on 400 MHz NMR spectrometers and resonances ( $\delta$ ) are given in parts per million relative to tetramethylsilane. Data are reported as follows: chemical shift, multiplicity (s = singlet, d = doublet, t = triplet, m = multiplet), coupling constants (Hz) and integration.  $^{13}\text{C}$  spectra were recorded in  $\text{CDCl}_3/\text{DMSO-d}_6$  on 100 MHz NMR spectrometers and resonances ( $\delta$ ) are given in ppm. HRMS were obtained on a Bruker 7-tesla FT-ICR MS equipped with an electrospray source. The X-ray crystal-structure determinations of **3v** were obtained on a Bruker SMART APEX CCD system. Melting points were determined using XT-4 apparatus and not corrected.

## 2. General procedure for the synthesis of **3** (**3a** as an example)

To a flame-dried pressure sealed tube charged with aspartate ester or phenylalanine (**1a**) (165.0 mg, 1.0 mmol), *p*-toluidine (**2a**) (53.5 mg, 0.5 mmol),  $\text{I}_2$  (190.5mg, 0.75mmol) and DMSO (3.0 mL, *c* 0.17 M) at 100 °C (heating block) for 12 h till almost completed conversion of the substrates by TLC analysis. When the reaction is completed, the reaction was quenched by slow addition of saturated sodium thiosulfate, water and ethyl acetate. The mixture was then poured into a separating funnel. After the phases were separated, and the aqueous phase was extracted three times with ethyl acetate. The combined organic layers were washed with brine, dried over anhydrous  $\text{Na}_2\text{SO}_4$ , and concentrated by rotary evaporation. The crude product can be separated by preparative TLC or silica gel column chromatography to obtain the dichlorination product **3a** (117.9 mg, 73% yield).

### 3. Mechanism study

When 20 equiv of  $\text{H}_2\text{O}^{18}$  was added to conduct the reaction under  $\text{N}_2$  using a dry-DMSO solvent, both  $3\text{a-O}^{18}$  and  $3\text{a-O}^{16}$  were detected as products. Since it is understandable that O-exchange could happen between 2-arylpyridines and  $\text{H}_2\text{O}$ , the detection of  $3\text{a-O}^{16}$  clearly proved that the oxygen in the product comes from both DMSO and water.

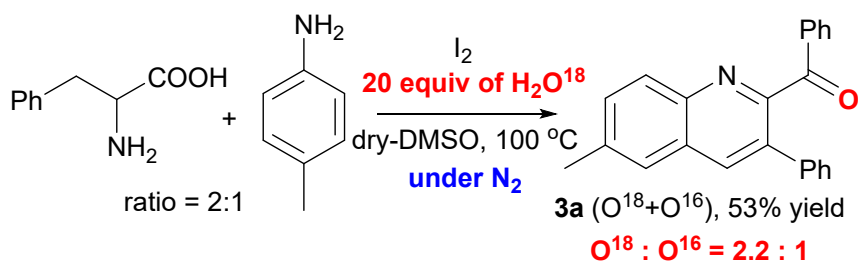

The HRMS Spectra of  $3\text{a-O}^{18}$  is listed below:

HRMS (ESI)  $m/z$  calcd for  $\text{C}_{23}\text{H}_{17}\text{N}^{18}\text{ONa}^+$  ( $\text{M}+\text{Na}$ ) $^+$  348.12448, found 348.12439.

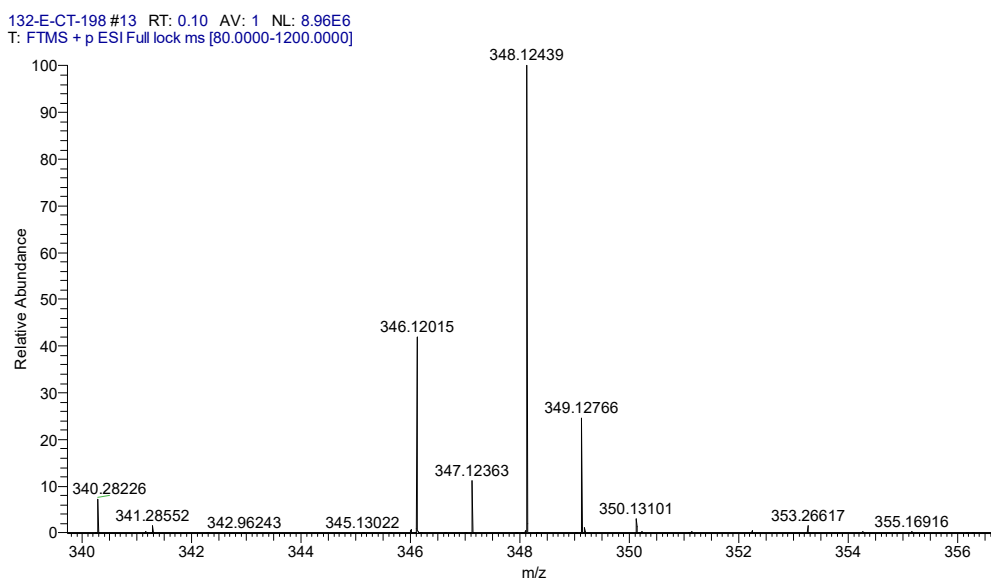

#### 4. Characterization data for compounds 3 and 5a

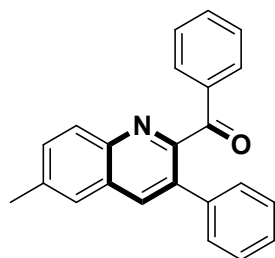

**(6-methyl-3-phenylquinolin-2-yl)(phenyl)methanone (3a)**<sup>[1]</sup> Yield 73%; 117.9 mg; yellow solid; mp 96–98 °C;  $R_f$  0.2 (EtOAc/petroleum ether = 1:15); IR (KBr): 1676, 1595, 1286, 904, 825, 717, 696  $\text{cm}^{-1}$ ;  $^1\text{H NMR}$  (400 MHz,  $\text{CDCl}_3$ )  $\delta$  8.17 (s, 1H), 8.07 (d,  $J = 8.8$  Hz, 1H), 7.87 (d,  $J = 7.6$  Hz, 2H), 7.68 (s, 1H), 7.61 (d,  $J = 8.8$  Hz, 1H), 7.53 (t,  $J = 7.6$  Hz, 1H), 7.39 (t,  $J = 7.6$  Hz, 4H), 7.35–7.26 (m, 3H), 2.59 (s, 3H).  $^{13}\text{C NMR}$  (100 MHz,  $\text{CDCl}_3$ )  $\delta$  195.2, 155.3, 144.6, 138.1, 137.9, 136.5, 136.2, 134.0, 133.4, 132.5, 130.4, 129.3, 129.0, 128.6, 128.3, 128.1, 127.8, 126.5, 21.7. HRMS (ESI)  $m/z$  calcd for  $\text{C}_{23}\text{H}_{18}\text{NO}^+$  ( $\text{M}+\text{H}$ )<sup>+</sup> 324.1383, found 324.1382.

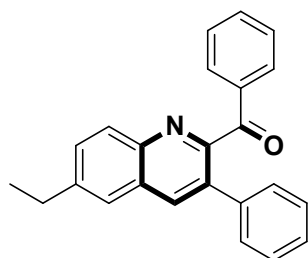

**(6-ethyl-3-phenylquinolin-2-yl)(phenyl)methanone (3b)** Yield 72%; 120.6 mg; yellow solid; mp 93-95 °C;  $R_f$  0.2 (EtOAc/petroleum ether = 1:15); IR (KBr): 1670, 1286, 898, 844, 740, 715, 700, 688  $\text{cm}^{-1}$ ;  $^1\text{H NMR}$  (400 MHz,  $\text{CDCl}_3$ )  $\delta$  8.21 (s, 1H), 8.10 (d,  $J = 8.8$  Hz, 1H), 7.87 (d,  $J = 7.2$  Hz, 2H), 7.70 (s, 1H), 7.65 (d,  $J = 8.8$  Hz, 1H), 7.53 (t,  $J = 7.6$  Hz, 1H), 7.39 (t,  $J = 7.6$  Hz, 4H), 7.35–7.27 (m, 3H), 2.89 (q,  $J = 7.6$  Hz, 2H), 1.38 (t,  $J = 7.6$  Hz, 3H).  $^{13}\text{C NMR}$  (100 MHz,  $\text{CDCl}_3$ )  $\delta$  195.2, 155.4, 144.8, 144.3, 137.9, 136.7, 136.2, 134.0, 133.4, 131.5, 130.5, 129.4, 129.0, 128.6, 128.4, 128.2, 127.8, 125.2, 29.0, 15.3. HRMS (ESI)  $m/z$  calcd for  $\text{C}_{24}\text{H}_{20}\text{NO}_2^+$  ( $\text{M}+\text{H}$ )<sup>+</sup> 338.1539, found 338.1538.

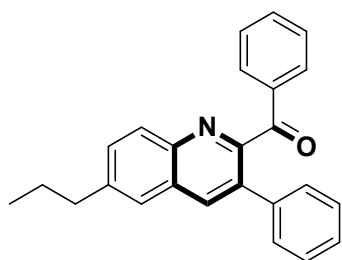

**phenyl(3-phenyl-6-propylquinolin-2-yl)methanone (3c)** Yield 65%; 114.1mg; yellow solid; mp 99-101 °C;  $R_f$  0.2 (EtOAc/petroleum ether = 1:15); IR (KBr): 1670, 1452, 1284, 1157, 908, 696  $\text{cm}^{-1}$ ;  $^1\text{H NMR}$  (400 MHz,  $\text{CDCl}_3$ )  $\delta$  8.20 (s, 1H), 8.10 (d,  $J = 8.8$  Hz, 1H), 7.87 (d,  $J = 7.6$  Hz, 2H), 7.68 (s, 1H), 7.63 (d,  $J = 8.8$  Hz, 1H), 7.53 (t,  $J = 7.6$  Hz, 1H), 7.39 (t,  $J = 7.6$  Hz, 4H), 7.35–7.27 (m, 3H), 2.83 (t,  $J = 7.6$  Hz, 2H), 1.78 (dd,  $J = 15.2, 7.6$  Hz, 2H), 1.01 (t,  $J = 7.2$  Hz, 3H).  $^{13}\text{C NMR}$  (100 MHz,  $\text{CDCl}_3$ )  $\delta$  195.1, 155.3, 144.7, 142.8, 137.9, 136.8, 136.2, 134.0, 133.4, 131.9, 130.5, 129.3, 129.0, 128.6, 128.3, 128.1, 127.8, 126.0, 38.0, 24.3, 13.8. HRMS (ESI)  $m/z$  calcd for  $\text{C}_{25}\text{H}_{22}\text{NO}^+$  ( $\text{M}+\text{H}$ ) $^+$  352.1696, found 352.1692.

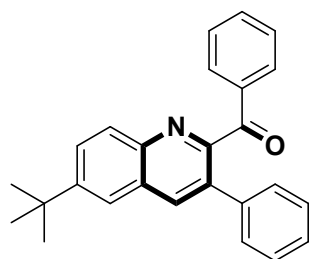

**(6-(tert-butyl)-3-phenylquinolin-2-yl)(phenyl)methanone (3d)** Yield 61%; 111.9 mg; yellow oil;  $R_f$  0.2 (EtOAc/petroleum ether = 1:15); IR (KBr): 1676, 1452, 1284, 1157, 908, 696  $\text{cm}^{-1}$ ;  $^1\text{H NMR}$  (400 MHz,  $\text{CDCl}_3$ )  $\delta$  8.24 (s, 1H), 8.12 (d,  $J = 8.8$  Hz, 1H), 7.90–7.83 (m, 4H), 7.52 (d,  $J = 7.6$  Hz, 1H), 7.41–7.36 (m, 4H), 7.34–7.27 (m, 3H), 1.46 (s, 9H).  $^{13}\text{C NMR}$  (100 MHz,  $\text{CDCl}_3$ )  $\delta$  195.2, 155.6, 151.1, 144.6, 137.9, 137.2, 136.3, 134.0, 133.4, 130.5, 129.2, 129.1, 129.0, 128.5, 128.3, 127.9, 127.8, 122.6, 35.1, 31.1. HRMS (ESI)  $m/z$  calcd for  $\text{C}_{26}\text{H}_{24}\text{NO}^+$  ( $\text{M}+\text{H}$ ) $^+$  366.1852, found 366.1851.

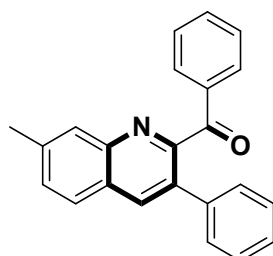

**(7-methyl-3-phenylquinolin-2-yl)(phenyl)methanone (3e)**<sup>[2]</sup> Yield 70%; 113.0 mg; yellow solid; mp 89-91 °C;  $R_f$  0.2 (EtOAc/petroleum ether = 1:15); IR (KBr): 1676, 1276, 1149, 897, 698  $\text{cm}^{-1}$ ;  $^1\text{H NMR}$  (400 MHz,  $\text{CDCl}_3$ )  $\delta$  8.23 (s, 1H), 7.97 (s, 1H), 7.88 (d,  $J = 7.6$  Hz, 2H), 7.83 (d,  $J = 8.4$  Hz, 1H), 7.56–7.48 (m, 2H), 7.43–7.36 (m,

4H), 7.35–7.27 (m, 3H), 2.59 (s, 3H).  $^{13}\text{C}$  NMR (100 MHz,  $\text{CDCl}_3$ )  $\delta$  195.2, 156.1, 146.2, 140.6, 137.8, 136.9, 136.2, 133.5, 133.2, 130.5, 130.3, 129.0, 128.6, 128.5, 128.4, 127.8, 127.3, 126.2, 22.0. HRMS (ESI)  $m/z$  calcd for  $\text{C}_{23}\text{H}_{18}\text{NO}^+$  ( $\text{M}+\text{H}$ ) $^+$  324.1383, found 324.1382.

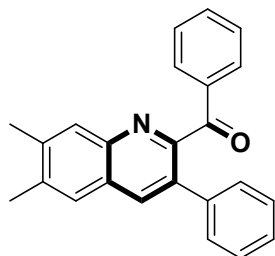

**(6,7-dimethyl-3-phenylquinolin-2-yl)(phenyl)methanone (3f)**<sup>[2]</sup> Yield 65%; 110.2 mg; yellow solid; mp 97-99 °C;  $R_f$  0.2 (EtOAc/petroleum ether = 1:15); IR (KBr): 1666, 1450, 910, 704  $\text{cm}^{-1}$ ;  $^1\text{H}$  NMR (400 MHz,  $\text{CDCl}_3$ )  $\delta$  8.14 (s, 1H), 7.94 (s, 1H), 7.87 (d,  $J = 7.6$  Hz, 2H), 7.65 (s, 1H), 7.53 (t,  $J = 7.6$  Hz, 1H), 7.42–7.36 (m, 4H), 7.34–7.26 (m, 3H), 2.49 (s, 6H).  $^{13}\text{C}$  NMR (100 MHz,  $\text{CDCl}_3$ )  $\delta$  195.3, 155.2, 145.1, 140.6, 138.2, 138.1, 136.3, 136.1, 133.4, 133.3, 130.5, 128.9, 128.8, 128.5, 128.3, 127.7, 126.8, 126.7, 20.5, 20.2. HRMS (ESI)  $m/z$  calcd for  $\text{C}_{24}\text{H}_{20}\text{NO}^+$  ( $\text{M}+\text{H}$ ) $^+$  338.1539, found 338.1538.

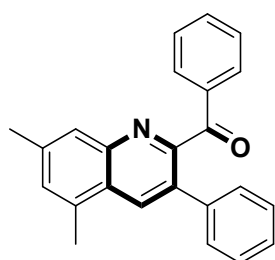

**(5,7-dimethyl-3-phenylquinolin-2-yl)(phenyl)methanone (3g)** Yield 69%; 117.0 mg; yellow solid; mp 98-100 °C;  $R_f$  0.2 (EtOAc/petroleum ether = 1:15); IR (KBr): 1674, 1618, 1458, 1419, 1276, 1213, 1157, 918, 698  $\text{cm}^{-1}$ ;  $^1\text{H}$  NMR (400 MHz,  $\text{CDCl}_3$ )  $\delta$  8.36 (s, 1H), 7.90–7.81 (m, 3H), 7.53 (t,  $J = 7.6$  Hz, 1H), 7.39 (t,  $J = 7.6$  Hz, 4H), 7.32 (dd,  $J = 12.8, 5.2$  Hz, 4H), 2.72 (s, 3H), 2.54 (s, 3H).  $^{13}\text{C}$  NMR (100 MHz,  $\text{CDCl}_3$ )  $\delta$  195.2, 155.5, 146.5, 140.3, 138.2, 136.2, 134.3, 133.8, 133.4, 132.8, 130.8, 130.5, 129.1, 128.6, 128.3, 127.8, 126.6, 125.6, 21.9, 18.6. HRMS (ESI)  $m/z$  calcd for  $\text{C}_{24}\text{H}_{20}\text{NO}^+$  ( $\text{M}+\text{H}$ ) $^+$  338.1539, found 338.1537.

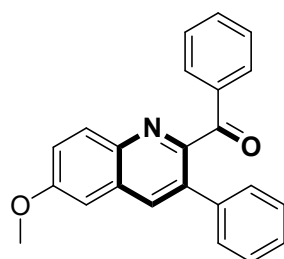

**(6-methoxy-3-phenylquinolin-2-yl)(phenyl)methanone (3h)**<sup>[1]</sup> Yield 73%; 123.7 mg; yellow solid; mp 142-144 °C; R<sub>f</sub> 0.2 (EtOAc/petroleum ether = 1:12); IR (KBr): 1676, 1618, 1490, 1276, 1213, 698 cm<sup>-1</sup>; <sup>1</sup>H NMR (400 MHz, CDCl<sub>3</sub>) δ 8.15 (s, 1H), 8.07 (d, J = 9.2 Hz, 1H), 7.88 (d, J = 7.2 Hz, 2H), 7.53 (t, J = 7.6 Hz, 1H), 7.45–7.35 (m, 5H), 7.35–7.26 (m, 3H), 7.16 (d, J = 2.8 Hz, 1H), 3.97 (s, 3H). <sup>13</sup>C NMR (100 MHz, CDCl<sub>3</sub>) δ 195.2, 159.0, 153.7, 142.1, 138.0, 136.3, 135.9, 134.5, 133.4, 131.1, 130.5, 129.3, 128.9, 128.5, 128.3, 127.8, 123.1, 104.8, 55.6. HRMS (ESI) m/z calcd for C<sub>23</sub>H<sub>18</sub>NO<sub>2</sub><sup>+</sup> (M+H)<sup>+</sup> 340.1332, found 340.1329.

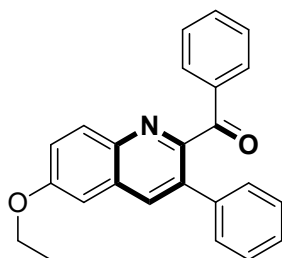

**(6-ethoxy-3-phenylquinolin-2-yl)(phenyl)methanone (3i)** Yield 72%; 127.1 mg; yellow solid; mp 143-145 °C; R<sub>f</sub> 0.2 (EtOAc/petroleum ether = 1:12); IR (KBr): 1676, 1618, 1597, 1490, 1452, 1309, 1274, 698 cm<sup>-1</sup>; <sup>1</sup>H NMR (400 MHz, CDCl<sub>3</sub>) δ 8.13 (s, 1H), 8.06 (d, J = 9.2 Hz, 1H), 7.88 (d, J = 7.6 Hz, 2H), 7.52 (d, J = 7.6 Hz, 1H), 7.43–7.37 (m, 5H), 7.34–7.28 (m, 3H), 7.15 (d, J = 2.8 Hz, 1H), 4.20 (q, J = 7.2 Hz, 2H), 1.52 (t, J = 7.2 Hz, 3H). <sup>13</sup>C NMR (100 MHz, CDCl<sub>3</sub>) δ 195.2, 158.3, 153.6, 142.0, 138.1, 136.4, 135.8, 134.5, 133.3, 131.1, 130.5, 129.4, 128.9, 128.5, 128.3, 127.8, 123.4, 105.5, 63.9, 14.7. HRMS (ESI) m/z calcd for C<sub>24</sub>H<sub>20</sub>NO<sub>2</sub><sup>+</sup> (M+H)<sup>+</sup> 354.1489, found 354.1486.

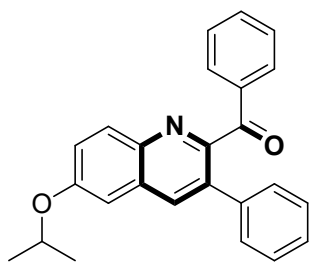

**(6-isopropoxy-3-phenylquinolin-2-yl)(phenyl)methanone (3j)** Yield 69%; 126.6 mg; yellow solid; mp 146-148 °C; R<sub>f</sub> 0.2 (EtOAc/petroleum ether = 1:12); IR (KBr): 1674, 1618, 1487, 1452, 1288, 1213, 1110, 694 cm<sup>-1</sup>; <sup>1</sup>H NMR (400 MHz, CDCl<sub>3</sub>) δ 8.12 (s, 1H), 8.06 (d, J = 9.2 Hz, 1H), 7.88 (d, J = 7.2 Hz, 2H), 7.53 (t, J = 7.6 Hz, 1H), 7.39 (dd, J = 9.6, 5.6 Hz, 5H), 7.33–7.27 (m, 3H), 7.16 (d, J = 2.8 Hz, 1H), 4.75 (dt, J = 12.0, 6.0 Hz, 1H), 1.44 (d, J = 6.0 Hz, 6H). <sup>13</sup>C NMR (100 MHz, CDCl<sub>3</sub>) δ 195.2, 157.2, 153.5, 141.8, 138.1, 136.4, 135.8, 134.4, 133.3, 131.2, 130.5, 129.4, 128.9, 128.5, 128.3, 127.8, 124.0, 107.0, 70.3, 21.9. HRMS (ESI) m/z calcd for C<sub>25</sub>H<sub>22</sub>NO<sub>2</sub><sup>+</sup> (M+H)<sup>+</sup> 368.1645, found 368.1643.

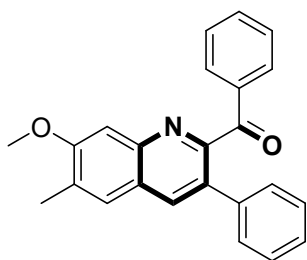

**(7-methoxy-6-methyl-3-phenylquinolin-2-yl)(phenyl)methanone (3k)** Yield 71%; 125.3 mg; yellow solid; mp 147-159 °C;  $R_f$  0.2 (EtOAc/petroleum ether = 1:12); IR (KBr): 1674, 1491, 1448, 1238, 1141, 916, 700  $\text{cm}^{-1}$ ;  $^1\text{H NMR}$  (400 MHz,  $\text{CDCl}_3$ )  $\delta$  8.11 (s, 1H), 7.87 (d,  $J$  = 7.6 Hz, 2H), 7.63 (s, 1H), 7.52 (t,  $J$  = 7.2 Hz, 1H), 7.44 (s, 1H), 7.42–7.35 (m, 4H), 7.33–7.26 (m, 3H), 3.97 (s, 3H), 2.44 (s, 3H).  $^{13}\text{C NMR}$  (100 MHz,  $\text{CDCl}_3$ )  $\delta$  195.5, 160.4, 155.2, 146.8, 138.1, 136.3, 136.0, 133.4, 131.8, 131.4, 130.4, 129.0, 128.5, 128.3, 127.7, 127.6, 123.3, 106.2, 55.7, 17.0. HRMS (ESI)  $m/z$  calcd for  $\text{C}_{24}\text{H}_{20}\text{NO}_2^+$  ( $\text{M}+\text{H}$ ) $^+$  354.1489, found 354.1487.

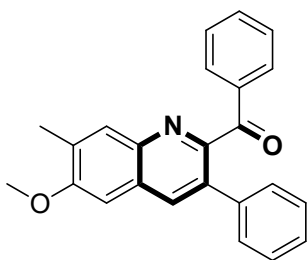

**(6-methoxy-7-methyl-3-phenylquinolin-2-yl)(phenyl)methanone (3l)** Yield 72%; 127.1 mg; yellow solid; mp 150-152 °C;  $R_f$  0.2 (EtOAc/petroleum ether = 1:12); IR (KBr): 1672, 1489, 1417, 1228, 1016, 927, 696  $\text{cm}^{-1}$ ;  $^1\text{H NMR}$  (400 MHz,  $\text{CDCl}_3$ )  $\delta$  8.12 (s, 1H), 7.93–7.86 (m, 3H), 7.52 (d,  $J$  = 7.2 Hz, 1H), 7.41–7.36 (m, 4H), 7.33–7.27 (m, 3H), 7.09 (s, 1H), 3.99 (s, 3H), 2.43 (s, 3H).  $^{13}\text{C NMR}$  (100 MHz,  $\text{CDCl}_3$ )  $\delta$  195.3, 158.3, 153.3, 141.9, 138.2, 136.5, 135.4, 133.69, 133.65, 133.3, 130.5, 130.3, 129.0, 128.5, 128.3, 128.1, 127.6, 103.3, 55.6, 17.2. HRMS (ESI)  $m/z$  calcd for  $\text{C}_{24}\text{H}_{20}\text{NO}_2^+$  ( $\text{M}+\text{H}$ ) $^+$  354.1489, found 354.1487.

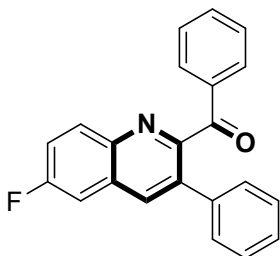

**(6-fluoro-3-phenylquinolin-2-yl)(phenyl)methanone (3m)** Yield 69%; 112.8 mg; yellow solid; mp 95-97 °C;  $R_f$  0.2 (EtOAc/petroleum ether = 1:15); IR (KBr): 1676, 1448, 1284, 1207, 1151, 912, 694  $\text{cm}^{-1}$ ;  $^1\text{H NMR}$  (400 MHz,  $\text{CDCl}_3$ )  $\delta$  8.22 (s, 1H), 8.19 (dd,  $J$  = 10.0, 5.5 Hz, 1H), 7.87 (d,  $J$  = 7.7 Hz, 2H), 7.55 (t,  $J$  = 7.8 Hz, 3H), 7.40 (dd,  $J$  = 14.9, 7.0 Hz, 4H), 7.32 (d,  $J$  = 6.0 Hz, 3H).  $^{13}\text{C NMR}$  (100 MHz,  $\text{CDCl}_3$ )  $\delta$  194.8,



161.4 (d,  $J = 248.0$  Hz,  $^1J_{CF}$ ), 155.7, 143.0, 137.3, 136.5 (d,  $J = 5.0$  Hz,  $^3J_{CF}$ ), 136.0, 134.9, 133.6, 132.3 (d,  $J = 9.0$  Hz,  $^3J_{CF}$ ), 130.4, 128.9, 128.8, 128.7, 128.4, 128.1, 120.5 (d,  $J = 26.0$  Hz,  $^2J_{CF}$ ), 110.7 (d,  $J = 22.0$  Hz,  $^2J_{CF}$ ).  $^{19}\text{F}$  NMR (376 MHz,  $\text{CDCl}_3$ )  $\delta$  -110.85. HRMS (ESI)  $m/z$  calcd for  $\text{C}_{22}\text{H}_{15}\text{FNO}^+$  ( $\text{M}+\text{H}$ ) $^+$  328.1132, found 328.1135.

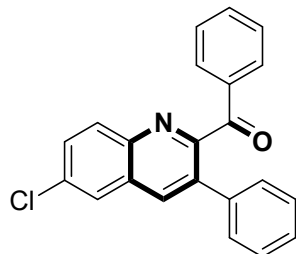

**(6-chloro-3-phenylquinolin-2-yl)(phenyl)methanone (3n)**<sup>[3]</sup> Yield 62%; 106.3mg; yellow solid; mp 100-102 °C;  $R_f$  0.2 (EtOAc/petroleum ether = 1:15); IR (KBr): 1676, 1448, 1286, 896, 758, 698  $\text{cm}^{-1}$ ;  $^1\text{H}$  NMR (400 MHz,  $\text{CDCl}_3$ )  $\delta$  8.18 (s, 1H), 8.11 (d,  $J = 9.2$  Hz, 1H), 7.91 (s, 1H), 7.86 (d,  $J = 8.0$  Hz, 2H), 7.71 (d,  $J = 8.8$  Hz, 1H), 7.55 (t,  $J = 7.2$  Hz, 1H), 7.42 (d,  $J = 7.6$  Hz, 2H), 7.38 (d,  $J = 8.8$  Hz, 2H), 7.32 (d,  $J = 6.0$  Hz, 3H).  $^{13}\text{C}$  NMR (100 MHz,  $\text{CDCl}_3$ )  $\delta$  194.7, 156.5, 144.4, 137.2, 136.1, 135.9, 135.0, 133.8, 133.7, 131.3, 131.1, 130.4, 128.9, 128.7, 128.5, 128.2, 126.3. HRMS (ESI)  $m/z$  calcd for  $\text{C}_{22}\text{H}_{15}\text{ClNO}^+$  ( $\text{M}+\text{H}$ ) $^+$  344.0837, found 344.0840.

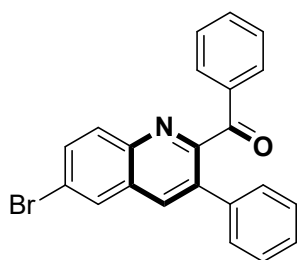

**(6-bromo-3-phenylquinolin-2-yl)(phenyl)methanone (3o)** Yield 54%; 104.5 mg; yellow solid; mp 123-125 °C;  $R_f$  0.2 (EtOAc/petroleum ether = 1:15); IR (KBr): 1680, 1595, 1448, 1286, 1220, 1178, 1153, 694  $\text{cm}^{-1}$ ;  $^1\text{H}$  NMR (400 MHz,  $\text{CDCl}_3$ )  $\delta$  8.18 (s, 1H), 8.10 (s, 1H), 8.05 (d,  $J = 8.4$  Hz, 1H), 7.85 (s, 3H), 7.55 (s, 1H), 7.45–7.29 (m, 7H).  $^{13}\text{C}$  NMR (100 MHz,  $\text{CDCl}_3$ )  $\delta$  194.7, 156.7, 144.5, 137.2, 136.0, 135.9, 135.0, 133.7, 133.6, 131.3, 130.4, 129.7, 129.2, 128.9, 128.7, 128.5, 128.2, 122.1. HRMS (ESI)  $m/z$  calcd for  $\text{C}_{22}\text{H}_{15}\text{BrNO}^+$  ( $\text{M}+\text{H}$ ) $^+$  388.0332, found 388.0334.

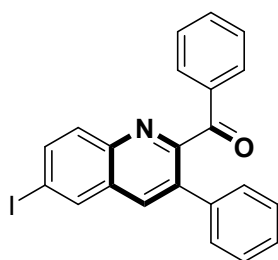

**(6-iodo-3-phenylquinolin-2-yl)(phenyl)methanone (3p)** Yield 48%; 104.4 mg; yellow solid; mp 129-131 °C;  $R_f$  0.2 (EtOAc/petroleum ether = 1:15); IR (KBr): 1678, 1282, 763, 706  $\text{cm}^{-1}$ ;  $^1\text{H NMR}$  (400 MHz,  $\text{CDCl}_3$ )  $\delta$  8.28 (s, 1H), 8.19 (d,  $J = 8.4$  Hz, 1H), 7.93 (d,  $J = 8.0$  Hz, 1H), 7.88 (d,  $J = 7.6$  Hz, 2H), 7.78 (t,  $J = 7.6$  Hz, 1H), 7.66 (t,  $J = 7.6$  Hz, 1H), 7.54 (t,  $J = 7.6$  Hz, 1H), 7.40 (t,  $J = 7.2$  Hz, 4H), 7.31 (d,  $J = 7.2$  Hz, 2H).  $^{13}\text{C NMR}$  (100 MHz,  $\text{CDCl}_3$ )  $\delta$  194.8, 156.8, 144.9, 138.9, 137.2, 136.4, 135.9, 135.8, 134.8, 133.7, 131.2, 130.4, 129.7, 128.9, 128.7, 128.5, 128.2, 93.9. HRMS (ESI)  $m/z$  calcd for  $\text{C}_{22}\text{H}_{15}\text{INO}^+$  ( $\text{M}+\text{H}$ ) $^+$  436.0193, found 436.0192.

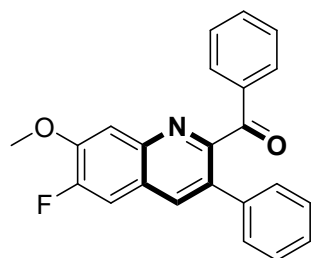

**(6-fluoro-7-methoxy-3-phenylquinolin-2-yl)(phenyl)methanone (3q)** Yield 68%; 121.4 mg; yellow solid; mp 147-149 °C;  $R_f$  0.2 (EtOAc/petroleum ether = 1:12); IR (KBr): 1674, 1450, 1236, 1147, 912, 754, 696  $\text{cm}^{-1}$ ;  $^1\text{H NMR}$  (400 MHz,  $\text{CDCl}_3$ )  $\delta$  8.15 (s, 1H), 7.86 (d,  $J = 8.0$  Hz, 2H), 7.60–7.52 (m, 3H), 7.44–7.35 (m, 4H), 7.34–7.27 (m, 3H), 4.03 (s, 3H).  $^{13}\text{C NMR}$  (100 MHz,  $\text{CDCl}_3$ )  $\delta$  195.1, 155.7 (d,  $J = 2.0$  Hz,  $^4J_{\text{CF}}$ ), 153.3 (d,  $J = 253.0$  Hz,  $^1J_{\text{CF}}$ ), 151.4 (d,  $J = 13.0$  Hz,  $^2J_{\text{CF}}$ ), 144.2, 137.5, 136.2 (d,  $J = 6.0$  Hz,  $^3J_{\text{CF}}$ ), 133.6, 132.8, 130.4, 129.0, 128.6, 128.4, 127.9, 123.1 (d,  $J = 9.0$  Hz,  $^3J_{\text{CF}}$ ), 111.2 (d,  $J = 19.0$  Hz,  $^2J_{\text{CF}}$ ), 109.9 (d,  $J = 3.0$  Hz,  $^4J_{\text{CF}}$ ), 56.3.  $^{19}\text{F NMR}$  (376 MHz,  $\text{CDCl}_3$ )  $\delta$  -129.99. HRMS (ESI)  $m/z$  calcd for  $\text{C}_{23}\text{H}_{17}\text{FNO}_2^+$  ( $\text{M}+\text{H}$ ) $^+$  358.1238, found 358.1235.

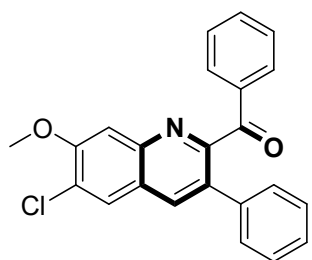

**(6-chloro-7-methoxy-3-phenylquinolin-2-yl)(phenyl)methanone (3r)** Yield 71%; 132.4 mg; yellow solid; mp 151-153 °C;  $R_f$  0.2 (EtOAc/petroleum ether = 1:12); IR (KBr): 1678, 1446, 1238, 914, 698  $\text{cm}^{-1}$ ;  $^1\text{H NMR}$  (400 MHz,  $\text{CDCl}_3$ )  $\delta$  8.13 (s, 1H), 7.94 (s, 1H), 7.86 (d,  $J = 7.6$  Hz, 2H), 7.57–7.52 (m, 2H), 7.43–7.28 (m, 7H), 4.04 (s, 3H).  $^{13}\text{C NMR}$  (100 MHz,  $\text{CDCl}_3$ )  $\delta$  195.0, 156.6, 156.5, 146.2, 137.4, 136.0, 135.8, 133.6, 132.8, 130.4, 129.0, 128.6, 128.5, 127.93, 127.86, 126.4, 123.3, 108.7, 56.6. HRMS (ESI)  $m/z$  calcd for  $\text{C}_{23}\text{H}_{17}\text{ClNO}_2^+$  ( $\text{M}+\text{H}$ ) $^+$  374.0942, found 374.0940.

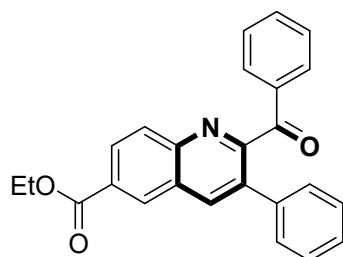

**ethyl 2-benzoyl-3-phenylquinoline-6-carboxylate (3s)**<sup>[1]</sup> Yield 55%; 104.8 mg; yellow solid; mp 96-98 °C;  $R_f$  0.2 (EtOAc/petroleum ether = 1:12); IR (KBr): 1710, 1678, 1276, 1250, 694  $\text{cm}^{-1}$ ;  $^1\text{H NMR}$  (400 MHz,  $\text{CDCl}_3$ )  $\delta$  8.70 (s, 1H), 8.40–8.34 (m, 2H), 8.21 (d,  $J$  = 8.8 Hz, 1H), 7.87 (d,  $J$  = 8.0 Hz, 2H), 7.55 (d,  $J$  = 7.6 Hz, 1H), 7.44–7.32 (m, 7H), 4.49 (q,  $J$  = 7.2 Hz, 2H), 1.47 (t,  $J$  = 7.2 Hz, 3H).  $^{13}\text{C NMR}$  (100 MHz,  $\text{CDCl}_3$ )  $\delta$  194.7, 165.9, 158.3, 147.7, 138.3, 137.1, 135.8, 134.8, 133.7, 130.7, 130.4, 129.9, 129.7, 129.6, 129.0, 128.7, 128.5, 128.2, 127.3, 61.5, 14.3. HRMS (ESI)  $m/z$  calcd for  $\text{C}_{25}\text{H}_{20}\text{NO}_3^+$  ( $\text{M}+\text{H}$ )<sup>+</sup> 382.1438, found 382.1436.

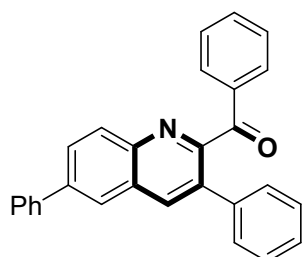

**(3,6-diphenylquinolin-2-yl)(phenyl)methanone (3t)** Yield 67%; 130.0 mg; yellow solid; mp 131-133 °C;  $R_f$  0.2 (EtOAc/petroleum ether = 1:15); IR (KBr): 1674, 1481, 1284, 760, 694  $\text{cm}^{-1}$ ;  $^1\text{H NMR}$  (400 MHz,  $\text{CDCl}_3$ )  $\delta$  8.31 (s, 1H), 8.24 (d,  $J$  = 8.8 Hz, 1H), 8.10 (d,  $J$  = 1.6 Hz, 1H), 8.04 (dd,  $J$  = 8.8, 2.0 Hz, 1H), 7.89 (d,  $J$  = 7.6 Hz, 2H), 7.76 (d,  $J$  = 7.2 Hz, 2H), 7.53 (t,  $J$  = 8.0 Hz, 3H), 7.44–7.38 (m, 5H), 7.35–7.29 (m, 3H).  $^{13}\text{C NMR}$  (100 MHz,  $\text{CDCl}_3$ )  $\delta$  195.1, 156.2, 145.4, 140.8, 140.1, 137.7, 137.3, 136.2, 134.5, 133.5, 130.5, 130.1, 129.9, 129.1, 129.0, 128.6, 128.4, 128.3, 128.0, 127.9, 127.5, 125.3. HRMS (ESI)  $m/z$  calcd for  $\text{C}_{28}\text{H}_{20}\text{NO}^+$  ( $\text{M}+\text{H}$ )<sup>+</sup> 386.1539, found 386.1538.

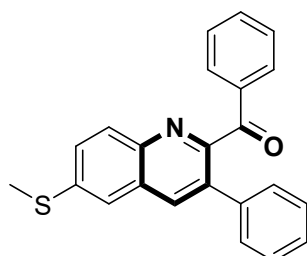

**(6-(methylthio)-3-phenylquinolin-2-yl)(phenyl)methanone (3u)** Yield 69%; 122.5 mg; yellow solid; mp 119-121 °C;  $R_f$  0.2 (EtOAc/petroleum ether = 1:12); IR (KBr): 1668, 1446, 1273, 1226, 903, 696  $\text{cm}^{-1}$ ;  $^1\text{H NMR}$  (400 MHz,  $\text{CDCl}_3$ )  $\delta$  8.15 (s, 1H), 8.05 (d,  $J$  = 8.9 Hz, 1H), 7.88 (d,  $J$  = 7.4 Hz, 2H), 7.66 – 7.58 (m, 2H), 7.55 (t,  $J$  = 7.4

Hz, 1H), 7.44 – 7.36 (m, 4H), 7.35 – 7.28 (m, 3H), 2.64 (s, 3H).  $^{13}\text{C}$  NMR (100 MHz,  $\text{CDCl}_3$ )  $\delta$  195.0, 155.1, 144.1, 139.6, 137.7, 136.2, 135.7, 134.8, 133.5, 130.5, 129.7, 129.4, 128.9, 128.6, 128.4, 127.9, 121.5, 15.4. HRMS (ESI)  $m/z$  calcd for  $\text{C}_{23}\text{H}_{18}\text{NOS}^+$  ( $\text{M}+\text{H}$ ) $^+$  356.1104, found 356.1100.

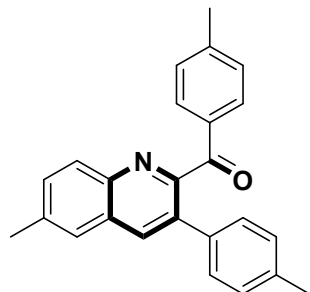

**(6-methyl-3-(p-tolyl)quinolin-2-yl)(p-tolyl)methanone (3v)** Yield 73%; 128.1 mg; yellow solid; mp 101-103 °C;  $R_f$  0.2 (EtOAc/petroleum ether = 1:15); IR (KBr): 825, 906, 1290, 1600, 1664  $\text{cm}^{-1}$ ;  $^1\text{H}$  NMR (400 MHz,  $\text{CDCl}_3$ )  $\delta$  8.15 (s, 1H), 8.06 (d,  $J$  = 8.8 Hz, 1H), 7.79 (d,  $J$  = 8.0 Hz, 2H), 7.67 (s, 1H), 7.59 (d,  $J$  = 8.8 Hz, 1H), 7.28 (d,  $J$  = 8.0 Hz, 2H), 7.20 (d,  $J$  = 8.0 Hz, 2H), 7.05 (dd,  $J$  = 61.6, 7.6 Hz, 2H), 2.59 (s, 3H), 2.39 (s, 3H), 2.32 (s, 3H).  $^{13}\text{C}$  NMR (100 MHz,  $\text{CDCl}_3$ )  $\delta$  195.0, 155.7, 144.4, 138.0, 137.7, 136.4, 135.1, 134.0, 133.9, 132.3, 130.7, 129.4, 129.3, 129.2, 128.8, 128.2, 126.5, 21.82, 21.78, 21.2. HRMS (ESI)  $m/z$  calcd for  $\text{C}_{25}\text{H}_{22}\text{NO}^+$  ( $\text{M}+\text{H}$ ) $^+$  352.1696, found 352.1694.

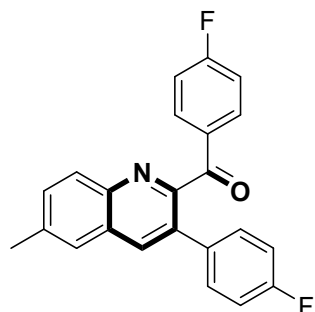

**(4-fluorophenyl)(3-(4-fluorophenyl)-6-methylquinolin-2-yl)methanone (3w)** Yield 69%; 123.9 mg; yellow solid; mp 101-103 °C;  $R_f$  0.2 (EtOAc/petroleum ether = 1:15); IR (KBr): 1666, 1595, 1296, 1224, 1145, 906, 835  $\text{cm}^{-1}$ ;  $^1\text{H}$  NMR (400 MHz,  $\text{CDCl}_3$ )  $\delta$  8.15 (s, 1H), 8.07 (d,  $J$  = 8.8 Hz, 1H), 7.91 (dd,  $J$  = 8.4, 5.6 Hz, 2H), 7.69 (s, 1H), 7.63 (d,  $J$  = 8.8 Hz, 1H), 7.33 (dd,  $J$  = 8.0, 5.6 Hz, 2H), 7.06 (dt,  $J$  = 22.4, 8.4 Hz, 4H), 2.60 (s, 3H).  $^{13}\text{C}$  NMR (100 MHz,  $\text{CDCl}_3$ )  $\delta$  193.5, 166.1 (d,  $J$  = 254.0 Hz,  $^1J_{\text{CF}}$ ), 162.6 (d,  $J$  = 247.0 Hz,  $^1J_{\text{CF}}$ ), 154.8, 144.6, 138.5, 136.7, 133.9 (d,  $J$  = 3.0 Hz,  $^4J_{\text{CF}}$ ), 133.2 (d,  $J$  = 9.0 Hz,  $^3J_{\text{CF}}$ ), 133.0, 132.8, 132.6 (d,  $J$  = 3.0 Hz,  $^4J_{\text{CF}}$ ), 130.7 (d,  $J$  = 8.0 Hz,  $^3J_{\text{CF}}$ ), 129.3, 128.2, 126.5, 115.74 (d,  $J$  = 22.0 Hz,  $^2J_{\text{CF}}$ ), 115.71 (d,  $J$  = 22.0 Hz,  $^2J_{\text{CF}}$ ), 21.8.  $^{19}\text{F}$  NMR (376 MHz,  $\text{CDCl}_3$ )  $\delta$  -103.84, -113.97. HRMS (ESI)  $m/z$  calcd for  $\text{C}_{23}\text{H}_{16}\text{F}_2\text{NO}^+$  ( $\text{M}+\text{H}$ ) $^+$  360.1194, found 360.1193.

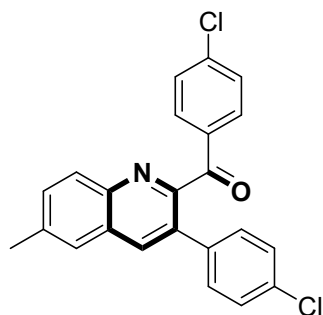

**(4-chlorophenyl)(3-(4-chlorophenyl)-6-methylquinolin-2-yl)methanone (3x)** Yield 62%; 121.2 mg; yellow solid; mp 107-109 °C;  $R_f$  0.2 (EtOAc/petroleum ether = 1:15); IR (KBr): 1664, 1583, 1292, 1088, 902, 829  $\text{cm}^{-1}$ ;  $^1\text{H NMR}$  (400 MHz,  $\text{CDCl}_3$ )  $\delta$  8.14 (s, 1H), 8.05 (d,  $J = 8.8$  Hz, 1H), 7.85 (d,  $J = 8.4$  Hz, 2H), 7.68 (s, 1H), 7.63 (d,  $J = 8.8$  Hz, 1H), 7.40 (d,  $J = 8.4$  Hz, 2H), 7.34-7.27 (m, 4H), 2.60 (s, 3H).  $^{13}\text{C NMR}$  (100 MHz,  $\text{CDCl}_3$ )  $\delta$  193.6, 154.3, 144.6, 140.2, 138.6, 136.7, 136.3, 134.5, 134.2, 132.95, 132.86, 131.9, 130.2, 129.3, 128.88, 128.86, 128.1, 126.5, 21.8. HRMS (ESI)  $m/z$  calcd for  $\text{C}_{23}\text{H}_{16}\text{Cl}_2\text{NO}^+$  ( $\text{M}+\text{H}$ ) $^+$  392.0603, found 392.0601.

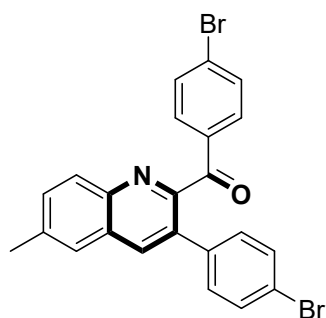

**(4-bromophenyl)(3-(4-bromophenyl)-6-methylquinolin-2-yl)methanone (3y)** Yield 57%; 136.8 mg; yellow solid; mp 129-131 °C;  $R_f$  0.2 (EtOAc/petroleum ether = 1:15); IR (KBr): 1672, 1581, 1286, 904, 831, 744  $\text{cm}^{-1}$ ;  $^1\text{H NMR}$  (400 MHz,  $\text{CDCl}_3$ )  $\delta$  8.15 (s, 1H), 8.06 (d,  $J = 8.8$  Hz, 1H), 7.77 (d,  $J = 8.4$  Hz, 2H), 7.68 (s, 1H), 7.63 (d,  $J = 8.8$  Hz, 1H), 7.57 (d,  $J = 8.4$  Hz, 2H), 7.47 (d,  $J = 8.4$  Hz, 2H), 7.22 (d,  $J = 8.4$  Hz, 2H), 2.60 (s, 3H).  $^{13}\text{C NMR}$  (100 MHz,  $\text{CDCl}_3$ )  $\delta$  193.6, 154.1, 144.5, 138.7, 136.8, 134.9, 133.00, 132.96, 132.0, 131.9, 131.8, 130.5, 129.2, 129.1, 128.1, 126.5, 122.5, 21.8. HRMS (ESI)  $m/z$  calcd for  $\text{C}_{23}\text{H}_{16}\text{Br}_2\text{NO}^+$  ( $\text{M}+\text{H}$ ) $^+$  481.9573, found 481.9569.

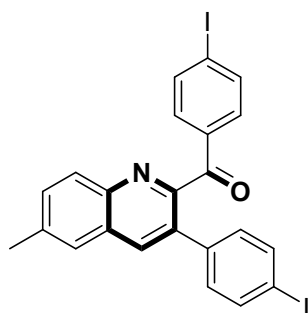

**(4-iodophenyl)(3-(4-iodophenyl)-6-methylquinolin-2-yl)methanone (3z)** Yield 54%; 155.2 mg; yellow solid; mp 135-137 °C;  $R_f$  0.2 (EtOAc/petroleum ether = 1:15);

IR (KBr): 1670, 1576, 1284, 902, 829, 744  $\text{cm}^{-1}$ ;  $^1\text{H NMR}$  (400 MHz,  $\text{CDCl}_3$ )  $\delta$  8.13 (s, 1H), 8.03 (d,  $J = 8.8$  Hz, 1H), 7.81 (d,  $J = 8.4$  Hz, 2H), 7.65 (dd,  $J = 19.6, 8.0$  Hz, 6H), 7.09 (d,  $J = 8.0$  Hz, 2H), 2.59 (s, 3H).  $^{13}\text{C NMR}$  (100 MHz,  $\text{CDCl}_3$ )  $\delta$  194.0, 154.1, 144.6, 138.7, 137.84, 137.76, 137.4, 136.6, 135.4, 133.1, 132.9, 131.8, 130.6, 129.3, 128.1, 126.5, 102.2, 94.1, 21.8. HRMS (ESI)  $m/z$  calcd for  $\text{C}_{23}\text{H}_{16}\text{I}_2\text{NO}^+$  (M+H) $^+$  575.9316, found 575.9311.

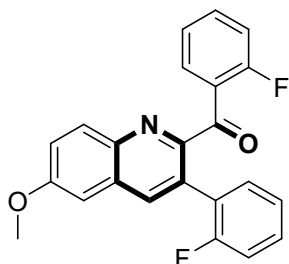

**(2-fluorophenyl)(3-(2-fluorophenyl)-6-methoxyquinolin-2-yl)methanone (3aa)**  
 Yield 67%; 125.6 mg; yellow solid; mp 118-120  $^{\circ}\text{C}$ ;  $R_f$  0.2 (EtOAc/petroleum ether = 1:12); IR (KBr): 1676, 1614, 1454, 1221, 916, 752  $\text{cm}^{-1}$ ;  $^1\text{H NMR}$  (400 MHz,  $\text{CDCl}_3$ )  $\delta$  8.13 (s, 1H), 8.00 (d,  $J = 9.2$  Hz, 1H), 7.83 (dd,  $J = 10.4, 4.4$  Hz, 1H), 7.52 (d,  $J = 7.6$  Hz, 1H), 7.48–7.38 (m, 2H), 7.33 (d,  $J = 7.6$  Hz, 1H), 7.22 (td,  $J = 7.6, 4.4$  Hz, 2H), 7.14 (d,  $J = 2.8$  Hz, 1H), 7.06 (dd,  $J = 18.0, 8.0$  Hz, 2H), 3.96 (s, 3H).  $^{13}\text{C NMR}$  (100 MHz,  $\text{CDCl}_3$ )  $\delta$  192.1, 161.8 (d,  $J = 255.0$  Hz,  $^1J_{\text{CF}}$ ), 159.3, 159.2 (d,  $J = 245.0$  Hz,  $^1J_{\text{CF}}$ ), 153.0, 142.3, 137.1, 134.4 (d,  $J = 8.0$  Hz,  $^3J_{\text{CF}}$ ), 131.9 (d,  $J = 2.0$  Hz,  $^4J_{\text{CF}}$ ), 131.5, 131.1 (d,  $J = 3.0$  Hz,  $^4J_{\text{CF}}$ ), 129.9 (d,  $J = 8.0$  Hz,  $^3J_{\text{CF}}$ ), 129.7, 128.1, 126.2 (d,  $J = 33.0$  Hz,  $^2J_{\text{CF}}$ ), 126.1 (d,  $J = 29.0$  Hz,  $^2J_{\text{CF}}$ ), 124.5 (d,  $J = 3.0$  Hz,  $^4J_{\text{CF}}$ ), 124.0 (d,  $J = 3.0$  Hz,  $^4J_{\text{CF}}$ ), 123.3, 116.3 (d,  $J = 22.0$  Hz,  $^2J_{\text{CF}}$ ), 115.6 (d,  $J = 22.0$  Hz,  $^2J_{\text{CF}}$ ), 104.9, 55.7.  $^{19}\text{F NMR}$  (376 MHz,  $\text{CDCl}_3$ )  $\delta$  -112.72, -114.99. HRMS (ESI)  $m/z$  calcd for  $\text{C}_{23}\text{H}_{16}\text{F}_2\text{NO}_2^+$  (M+H) $^+$  376.1144, found 376.1141.

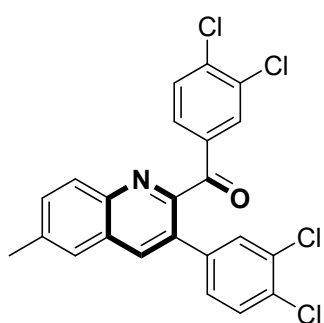

**(3,4-dichlorophenyl)(3-(3,4-dichlorophenyl)-6-methylquinolin-2-yl)methanone (3ab)**  
 Yield 61%; 140.6 mg; yellow solid; mp 135-137  $^{\circ}\text{C}$ ;  $R_f$  0.2 (EtOAc/petroleum ether = 1:15); IR (KBr): 1668, 1288, 1151, 1026, 927, 827  $\text{cm}^{-1}$ ;  $^1\text{H NMR}$  (400 MHz,  $\text{CDCl}_3$ )  $\delta$  8.16 (s, 1H), 8.06 (d,  $J = 8.8$  Hz, 2H), 7.79 (dd,  $J = 8.4, 2.0$  Hz, 1H), 7.70 (s, 1H), 7.67 (d,  $J = 8.8$  Hz, 1H), 7.55 (d,  $J = 8.4$  Hz, 1H), 7.50 (d,  $J = 2.0$  Hz, 1H), 7.42 (d,  $J = 8.4$  Hz, 1H), 7.14 (dd,  $J = 8.4, 2.0$  Hz, 1H), 2.61 (s, 3H).  $^{13}\text{C NMR}$  (100 MHz,  $\text{CDCl}_3$ )  $\delta$  192.0, 153.1, 144.6, 139.2, 138.4, 137.9, 137.1, 135.7, 133.3, 133.2, 132.9,

132.5, 132.4, 132.1, 130.70, 130.66, 130.6, 129.6, 129.4, 128.2, 128.1, 126.5, 21.8.  
HRMS (ESI) m/z calcd for C<sub>23</sub>H<sub>14</sub>Cl<sub>4</sub>NO<sup>+</sup> (M+H)<sup>+</sup> 461.9795, found 461.9792.

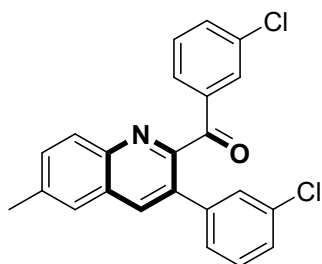

**(3-chlorophenyl)(3-(3-chlorophenyl)-6-methylquinolin-2-yl)methanone (3ac)**

Yield 64%; 125.1 mg; yellow solid; mp 102-104 °C; R<sub>f</sub> 0.2 (EtOAc/petroleum ether = 1:15); IR (KBr): 1672, 1566, 1209, 1157, 929, 827, 781, 748 cm<sup>-1</sup>; <sup>1</sup>H NMR (400 MHz, CDCl<sub>3</sub>) δ 8.17 (s, 1H), 8.07 (d, J = 8.8 Hz, 1H), 7.89 (s, 1H), 7.78 (d, J = 7.6 Hz, 1H), 7.69 (s, 1H), 7.65 (d, J = 8.8 Hz, 1H), 7.54 (d, J = 8.0 Hz, 1H), 7.38 (dd, J = 13.2, 4.8 Hz, 2H), 7.30 (d, J = 8.0 Hz, 1H), 7.26 (t, J = 3.6 Hz, 1H), 7.19 (d, J = 7.6 Hz, 1H), 2.60 (s, 3H). <sup>13</sup>C NMR (100 MHz, CDCl<sub>3</sub>) δ 193.3, 153.9, 144.7, 139.7, 138.8, 137.7, 136.9, 134.7, 134.6, 133.5, 133.0, 132.8, 130.3, 129.79, 129.78, 129.4, 128.9, 128.7, 128.1, 128.0, 127.2, 126.5, 21.8. HRMS (ESI) m/z calcd for C<sub>23</sub>H<sub>16</sub>Cl<sub>2</sub>NO<sup>+</sup> (M+H)<sup>+</sup> 392.0603, found 392.0598.

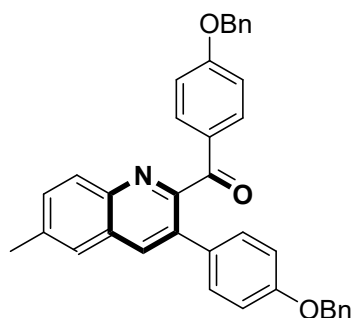

**(4-(benzyloxy)phenyl)(3-(4-(benzyloxy)phenyl)-6-methylquinolin-2-yl)methanone (3ad)**

Yield 63%; 168.5 mg; yellow solid; mp 142-144 °C; R<sub>f</sub> 0.2 (EtOAc/petroleum ether = 1:12); IR (KBr): 1666, 1599, 1510, 1249, 1228, 1149, 993, 908, 831, 738, 696 cm<sup>-1</sup>; <sup>1</sup>H NMR (400 MHz, CDCl<sub>3</sub>) δ 8.15–8.03 (m, 2H), 7.85 (d, J = 6.8 Hz, 2H), 7.62 (d, J = 26.8 Hz, 2H), 7.37 (d, J = 28.0 Hz, 14H), 6.94 (s, 4H), 5.07 (d, J = 29.6 Hz, 4H), 2.58 (s, 3H). <sup>13</sup>C NMR (100 MHz, CDCl<sub>3</sub>) δ 194.1, 163.0, 158.5, 155.8, 144.4, 137.8, 136.7, 136.1, 133.4, 132.9, 132.2, 130.5, 130.1, 129.5, 129.2, 128.7, 128.6, 128.23, 128.15, 128.0, 127.50, 127.48, 126.4, 114.9, 114.5, 70.1, 69.9, 21.7. HRMS (ESI) m/z calcd for C<sub>37</sub>H<sub>30</sub>NO<sub>3</sub><sup>+</sup> (M+H)<sup>+</sup> 536.2220, found 536.2221.

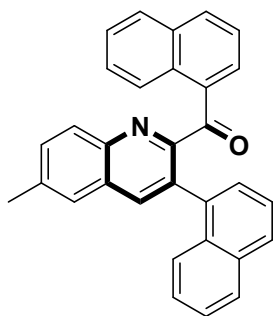

**(6-methyl-3-(naphthalen-1-yl)quinolin-2-yl)(naphthalen-1-yl)methanone (3ae)**

Yield 69%; 145.9 mg; yellow solid; mp 131-133 °C;  $R_f$  0.2 (EtOAc/petroleum ether = 1:15); IR (KBr): 1670, 1288, 902, 777, 752  $\text{cm}^{-1}$ ;  $^1\text{H NMR}$  (400 MHz,  $\text{CDCl}_3$ )  $\delta$  8.24 (dd,  $J = 13.2, 8.8$  Hz, 2H), 8.18 (s, 1H), 7.67 (t,  $J = 10.0$  Hz, 5H), 7.58 (d,  $J = 8.4$  Hz, 1H), 7.50 (d,  $J = 7.6$  Hz, 2H), 7.40–7.30 (m, 4H), 7.24 (d,  $J = 7.2$  Hz, 1H), 7.17–7.09 (m, 2H), 2.61 (s, 3H).  $^{13}\text{C NMR}$  (100 MHz,  $\text{CDCl}_3$ )  $\delta$  197.2, 157.4, 145.2, 138.4, 138.1, 135.2, 133.8, 133.4, 133.2, 132.8, 132.7, 132.4, 131.7, 131.3, 130.5, 129.7, 128.1, 128.0, 127.90, 127.88, 127.6, 126.4, 126.2, 126.0, 125.8, 125.7, 125.5, 124.8, 123.6, 21.8. HRMS (ESI)  $m/z$  calcd for  $\text{C}_{31}\text{H}_{22}\text{NO}^+$  ( $\text{M}+\text{H}$ ) $^+$  424.1696, found 424.1693.

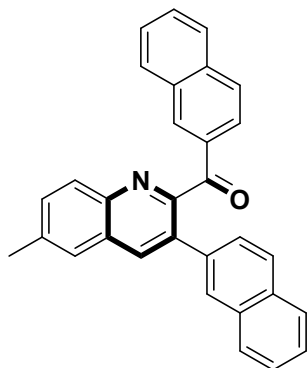

**(6-methyl-3-(naphthalen-2-yl)quinolin-2-yl)(naphthalen-2-yl)methanone (3af)**

Yield 68%; 143.8 mg; yellow solid; mp 137-139 °C;  $R_f$  0.2 (EtOAc/petroleum ether = 1:15); IR (KBr): 1660, 1294, 904, 825, 746  $\text{cm}^{-1}$ ;  $^1\text{H NMR}$  (400 MHz,  $\text{CDCl}_3$ )  $\delta$  8.38 (s, 1H), 8.32 (s, 1H), 8.11 (d,  $J = 8.8$  Hz, 1H), 8.04 (dd,  $J = 8.8, 1.2$  Hz, 1H), 7.92 (s, 1H), 7.84 (dd,  $J = 8.4, 3.6$  Hz, 3H), 7.75 (t,  $J = 8.4$  Hz, 4H), 7.64 (d,  $J = 8.8$  Hz, 1H), 7.57 (t,  $J = 7.6$  Hz, 1H), 7.52–7.46 (m, 2H), 7.43 (dd,  $J = 6.4, 3.2$  Hz, 2H), 2.62 (s, 3H).  $^{13}\text{C NMR}$  (100 MHz,  $\text{CDCl}_3$ )  $\delta$  195.2, 155.6, 144.6, 138.2, 136.9, 135.8, 135.4, 134.1, 133.7, 133.4, 133.2, 132.6, 132.5, 132.3, 129.8, 129.4, 128.7, 128.4, 128.3, 128.2, 128.1, 127.8, 127.6, 126.8, 126.60, 126.56, 126.4, 126.3, 125.1, 21.8. HRMS (ESI)  $m/z$  calcd for  $\text{C}_{31}\text{H}_{22}\text{NO}^+$  ( $\text{M}+\text{H}$ ) $^+$  424.1696, found 424.1693.



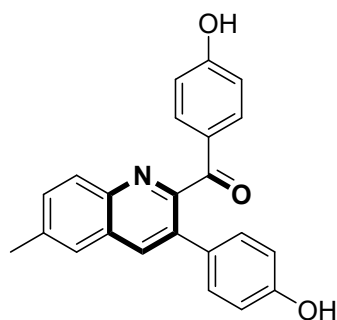

**(4-hydroxyphenyl)(3-(4-hydroxyphenyl)-6-methylquinolin-2-yl)methanone (5ah)**

Yield 37%; 65.7 mg; yellow solid; mp 169-171 °C;  $R_f$  0.3 (EtOAc/petroleum ether = 1:3); IR (KBr): 3370, 1660, 1591, 1282, 1226, 1153, 831, 756  $\text{cm}^{-1}$ ;  $^1\text{H NMR}$  (400 MHz,  $\text{DMSO-}d_6$ )  $\delta$  10.60 (s, 1H), 9.64 (s, 1H), 8.34 (s, 1H), 7.92 (d,  $J = 8.8$  Hz, 1H), 7.85 (s, 1H), 7.64 (d,  $J = 8.8$  Hz, 1H), 7.60 (d,  $J = 8.8$  Hz, 2H), 7.19 (d,  $J = 8.4$  Hz, 2H), 6.81 (d,  $J = 8.8$  Hz, 2H), 6.73 (d,  $J = 8.4$  Hz, 2H), 2.53 (s, 3H).  $^{13}\text{C NMR}$  (100 MHz,  $\text{DMSO-}d_6$ )  $\delta$  193.5, 162.8, 157.4, 156.0, 143.8, 137.5, 135.9, 133.0, 132.7, 132.3, 130.1, 128.5, 128.2, 128.0, 127.7, 126.8, 115.63, 115.58, 21.4. HRMS (ESI)  $m/z$  calcd for  $\text{C}_{23}\text{H}_{18}\text{NO}_3^+$  ( $\text{M}+\text{H}$ ) $^+$  356.1281, found 356.1278.

## 5. References

- [1] X. Geng, X. Wu, P. Zhao, J. Zhang, Y. D. Wu and A. X. Wu, *Org. Lett.*, 2017, **19**, 4179-4182.
- [2] Z. Y. Li, X. Y. Wang, L. F. Ma and N. Jiao, *Synlett.* 2017, **28**, 1581–1585.
- [3] X. Wan, S. Wang, C. Wu, J. Gan and C. Wang, *Org. Lett.*, 2021, **23**, 8799-8803.

## 6. Crystallographic data and molecular structure of **3v**

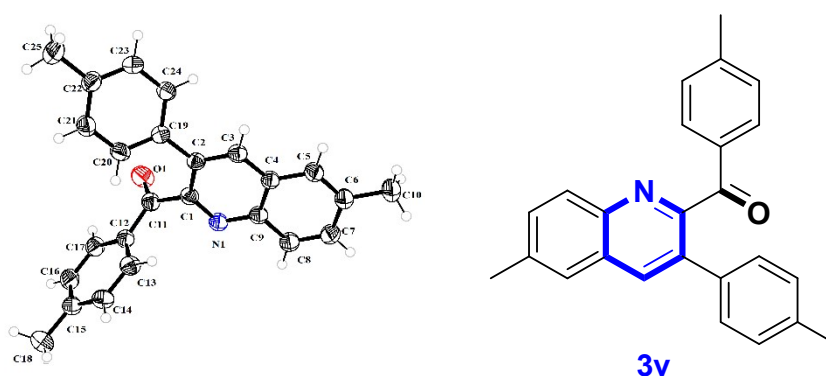

**Figure S1.** X-ray crystal structure of **3v**, thermal ellipsoids shown at 50% probability level. Sample preparation: 35 mg of **3v** was dissolved in 6 ml  $\text{CH}_2\text{Cl}_2$  and 1 ml  $\text{CH}_3\text{OH}$  at room temperature for slow evaporation about a week. The crystals were mounted on a glass fiber for diffraction experiments. Intensity data were collected on a Bruker SMART APEX CCD diffractometer with Mo  $K\alpha$  radiation (0.71073 Å) at room temperature. Crystal Data for Compound **3v**: CCDC 2227223 contains the supplementary crystallographic data for this paper. These data could be obtained free of charge from The Cambridge Crystallographic.

Bond precision: C-C = 0.0019 Å

Wavelength=0.71073

Cell: a=8.2419(15) b=10.5399(19) c=11.222(2)  
alpha=99.154(3) beta=93.011(3) gamma=102.359(3)  
Temperature: 296 K

|                        | Calculated   | Reported     |
|------------------------|--------------|--------------|
| Volume                 | 936.3(3)     | 936.3(3)     |
| Space group            | P -1         | P -1         |
| Hall group             | -P 1         | -P 1         |
| Moiety formula         | C25 H21 N O  | C25 H21 N O  |
| Sum formula            | C25 H21 N O  | C25 H21 N O  |
| Mr                     | 351.43       | 351.43       |
| Dx, g cm <sup>-3</sup> | 1.247        | 1.246        |
| Z                      | 2            | 2            |
| Mu (mm <sup>-1</sup> ) | 0.075        | 0.075        |
| F000                   | 372.0        | 372.0        |
| F000'                  | 372.14       |              |
| h, k, lmax             | 11, 14, 15   | 11, 14, 15   |
| Nref                   | 5644         | 5497         |
| Tmin, Tmax             | 0.985, 0.993 | 0.645, 0.746 |
| Tmin'                  | 0.985        |              |

Correction method= # Reported T Limits: Tmin=0.645 Tmax=0.746  
AbsCorr = MULTI-SCAN

Data completeness= 0.974

Theta(max)= 30.374

R(reflections)= 0.0567( 4130)

wR2(reflections)= 0.1870( 5497)

S = 1.040

Npar= 247

---

The following ALERTS were generated. Each ALERT has the format  
**test-name\_ALERT\_alert-type\_alert-level.**  
Click on the hyperlinks for more details of the test.

## 5. HRMS spectra for compounds 3 and 5ah

**(6-methyl-3-phenylquinolin-2-yl)(phenyl)methanone (3a)** HRMS (ESI) m/z calcd for  $C_{23}H_{18}NO^+$  (M+H)<sup>+</sup> 324.1383, found 324.1382.

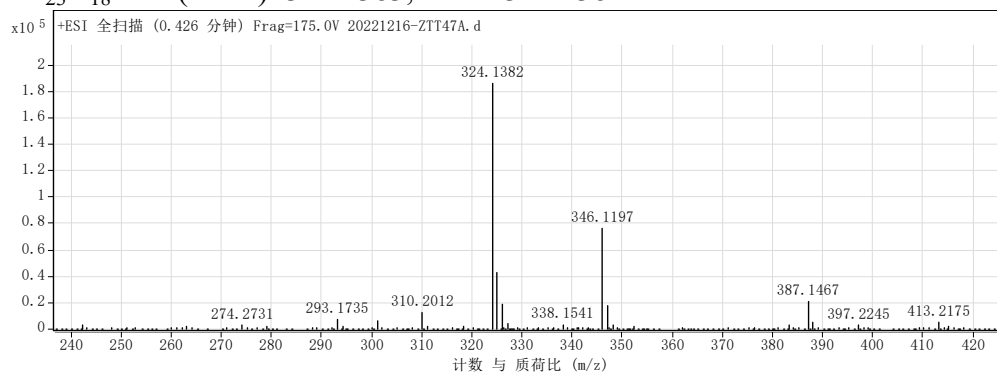

**(6-ethyl-3-phenylquinolin-2-yl)(phenyl)methanone (3b)** HRMS (ESI) m/z calcd for  $C_{24}H_{20}NO_2^+$  (M+H)<sup>+</sup> 338.1539, found 338.1538.

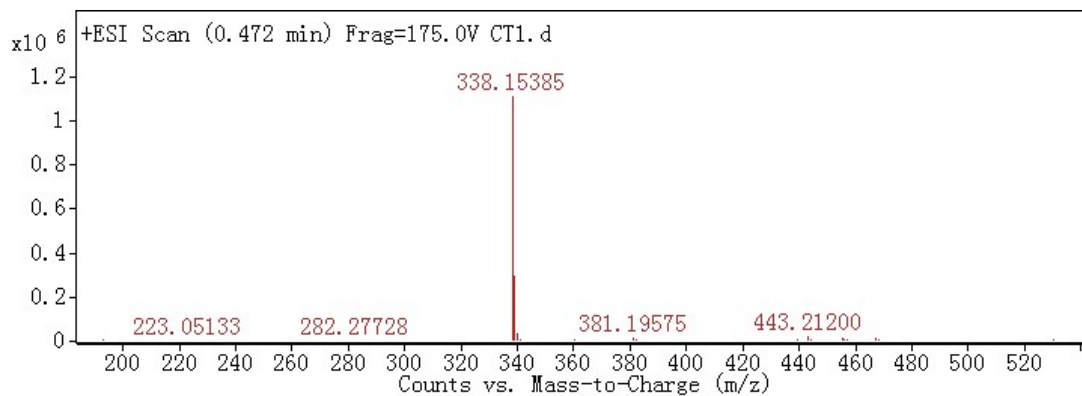

**phenyl(3-phenyl-6-propylquinolin-2-yl)methanone (3c)** HRMS (ESI) m/z calcd for  $C_{25}H_{22}NO^+$  (M+H)<sup>+</sup> 352.1696, found 352.1692.

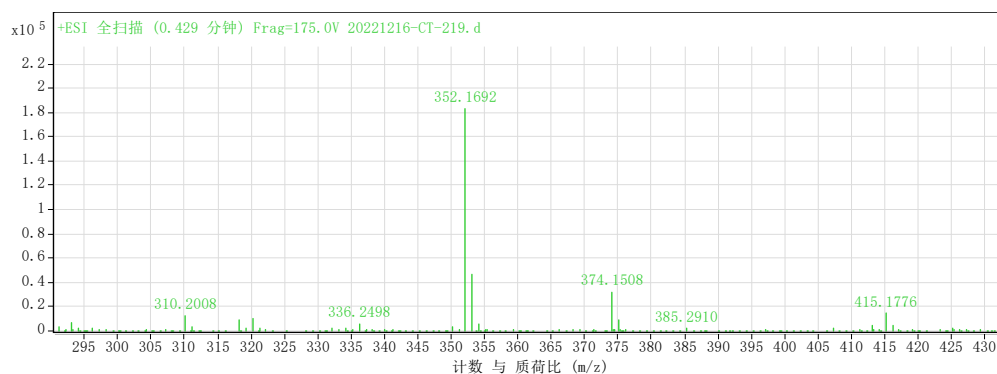

**(6-(tert-butyl)-3-phenylquinolin-2-yl)(phenyl)methanone (3d)** HRMS (ESI) m/z calcd for C<sub>26</sub>H<sub>24</sub>NO<sup>+</sup> (M+H)<sup>+</sup> 366.1852, found 366.1851.

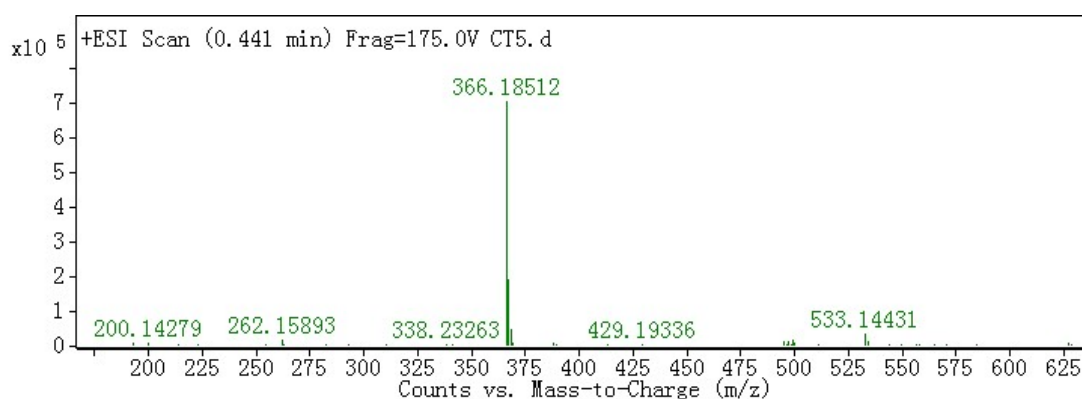

**(7-methyl-3-phenylquinolin-2-yl)(phenyl)methanone (3e)** HRMS (ESI) m/z calcd for C<sub>23</sub>H<sub>18</sub>NO<sup>+</sup> (M+H)<sup>+</sup> 324.1383, found 324.1382.

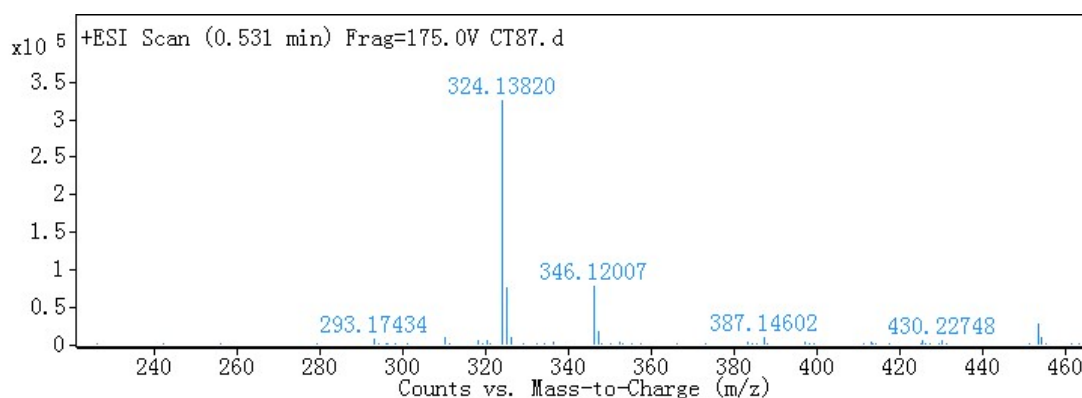

**(6,7-dimethyl-3-phenylquinolin-2-yl)(phenyl)methanone (3f)** HRMS (ESI) m/z calcd for C<sub>24</sub>H<sub>20</sub>NO<sup>+</sup> (M+H)<sup>+</sup> 338.1539, found 338.1538.

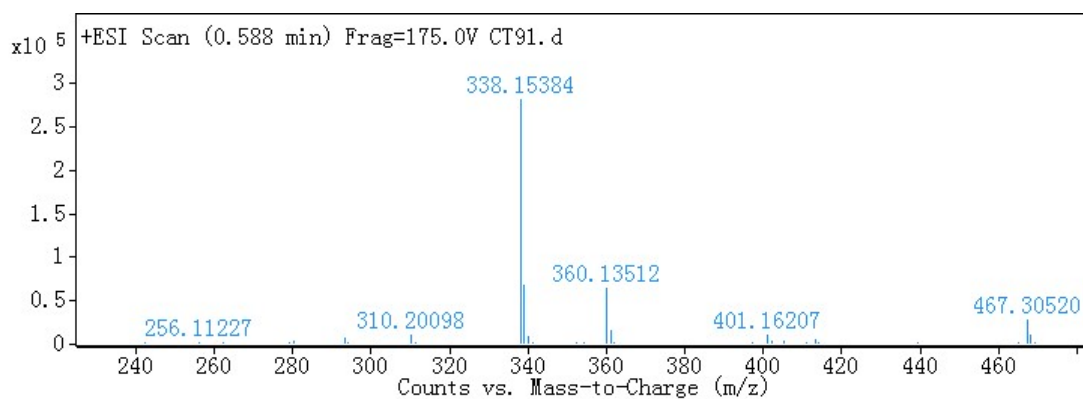

**(5,7-dimethyl-3-phenylquinolin-2-yl)(phenyl)methanone (3g)** HRMS (ESI) m/z calcd for  $C_{24}H_{20}NO^+$  (M+H)<sup>+</sup> 338.1539, found 338.1537.

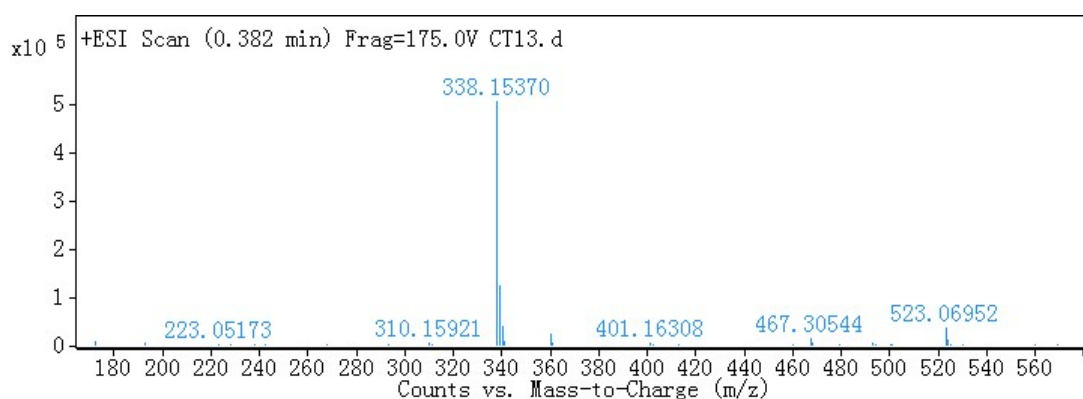

**(6-methoxy-3-phenylquinolin-2-yl)(phenyl)methanone (3h)** HRMS (ESI) m/z calcd for  $C_{23}H_{18}NO_2^+$  (M+H)<sup>+</sup> 340.1332, found 340.1329.

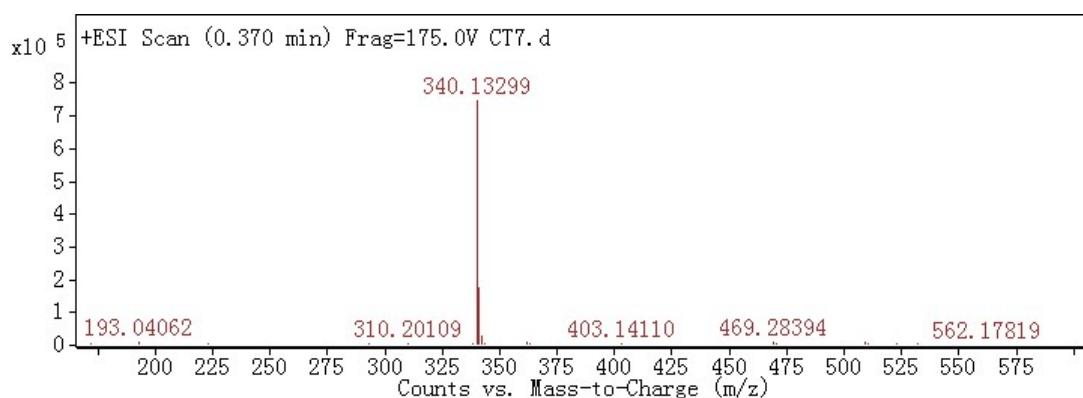

**(6-ethoxy-3-phenylquinolin-2-yl)(phenyl)methanone (3i)** HRMS (ESI) m/z calcd for  $C_{24}H_{20}NO_2^+$  (M+H)<sup>+</sup> 354.1489, found 354.1486.

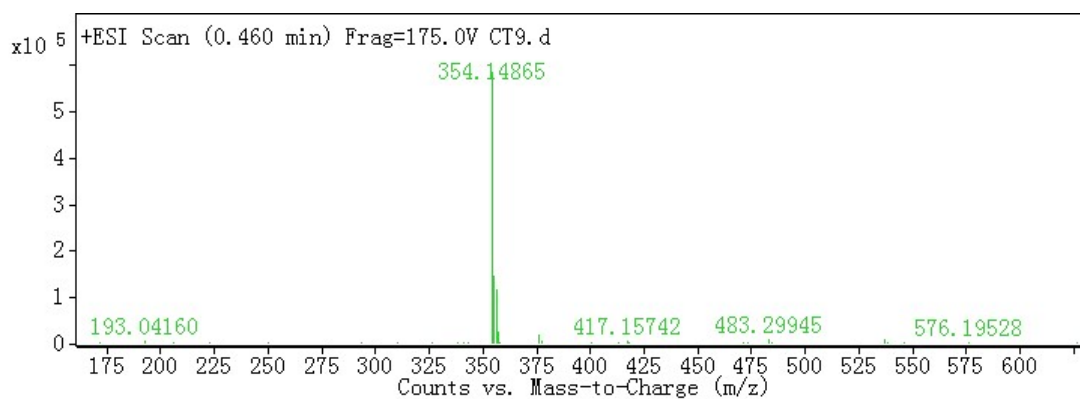

**(6-isopropoxy-3-phenylquinolin-2-yl)(phenyl)methanone (3j)** HRMS (ESI) m/z calcd for  $C_{25}H_{22}NO_2^+$  (M+H)<sup>+</sup> 368.1645, found 368.1643.

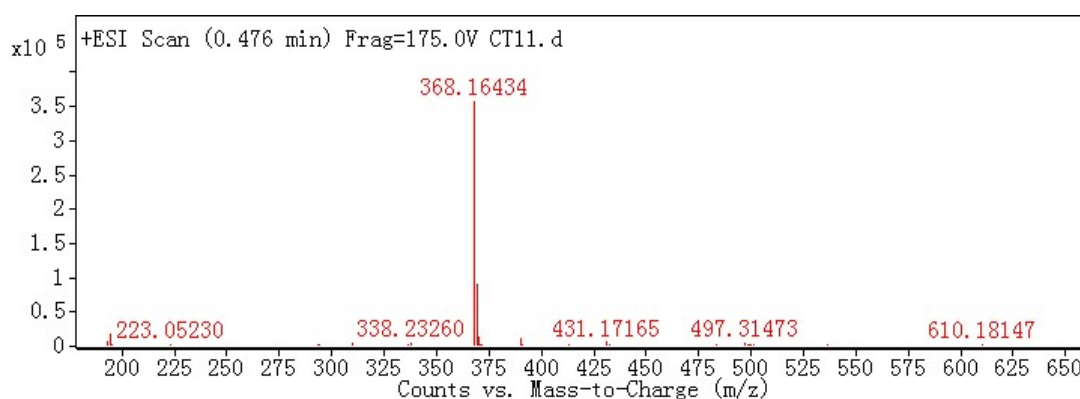

**(7-methoxy-6-methyl-3-phenylquinolin-2-yl)(phenyl)methanone (3k)** HRMS (ESI) m/z calcd for  $C_{24}H_{20}NO_2^+$  (M+H)<sup>+</sup> 354.1489, found 354.1487.

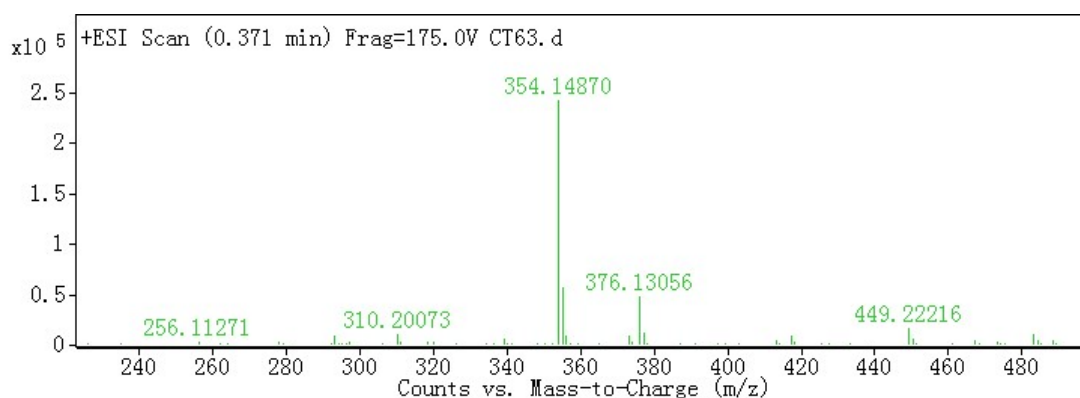

**(6-methoxy-7-methyl-3-phenylquinolin-2-yl)(phenyl)methanone (3l)** HRMS (ESI) m/z calcd for  $C_{24}H_{20}NO_2^+$  (M+H)<sup>+</sup> 354.1489, found 354.1487.

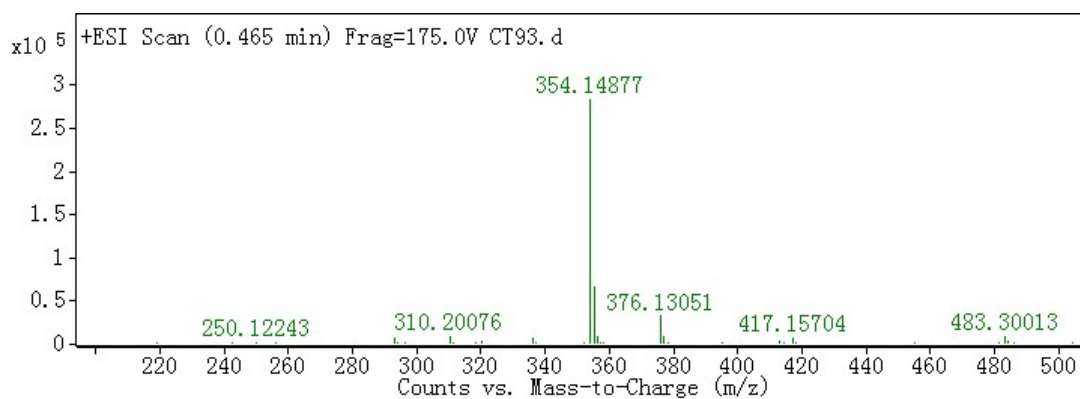

**(6-fluoro-3-phenylquinolin-2-yl)(phenyl)methanone (3m)** HRMS (ESI) m/z calcd for  $C_{22}H_{15}FNO^+$  (M+H)<sup>+</sup> 328.1132, found 328.1135.

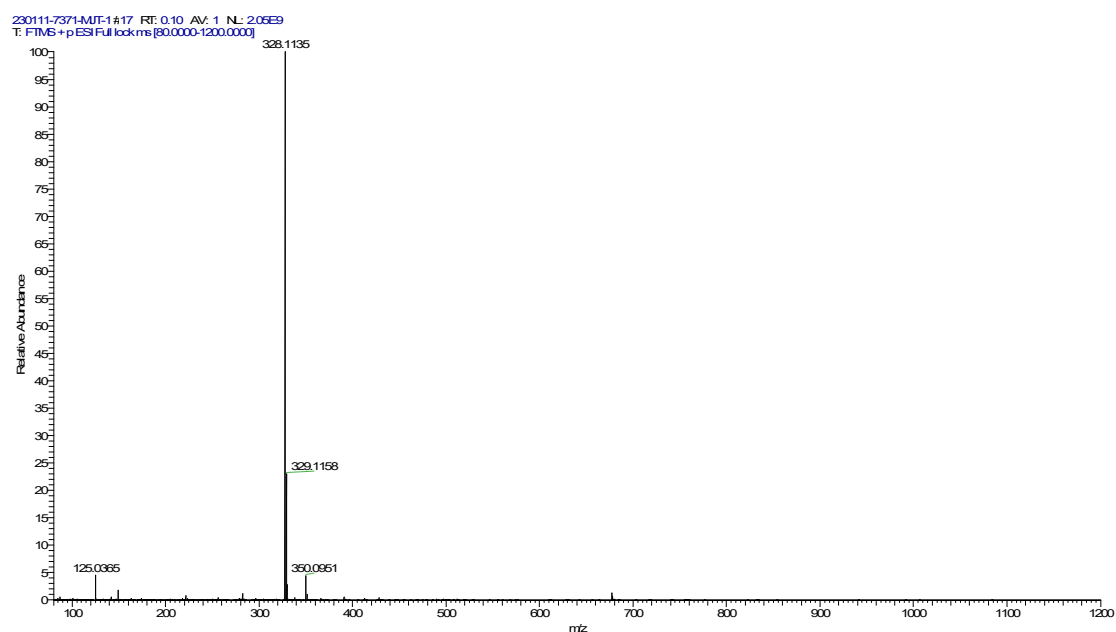

**(6-chloro-3-phenylquinolin-2-yl)(phenyl)methanone (3n)** HRMS (ESI) m/z calcd for  $C_{22}H_{15}ClNO^+$  (M+H)<sup>+</sup> 344.0837, found 344.0840.



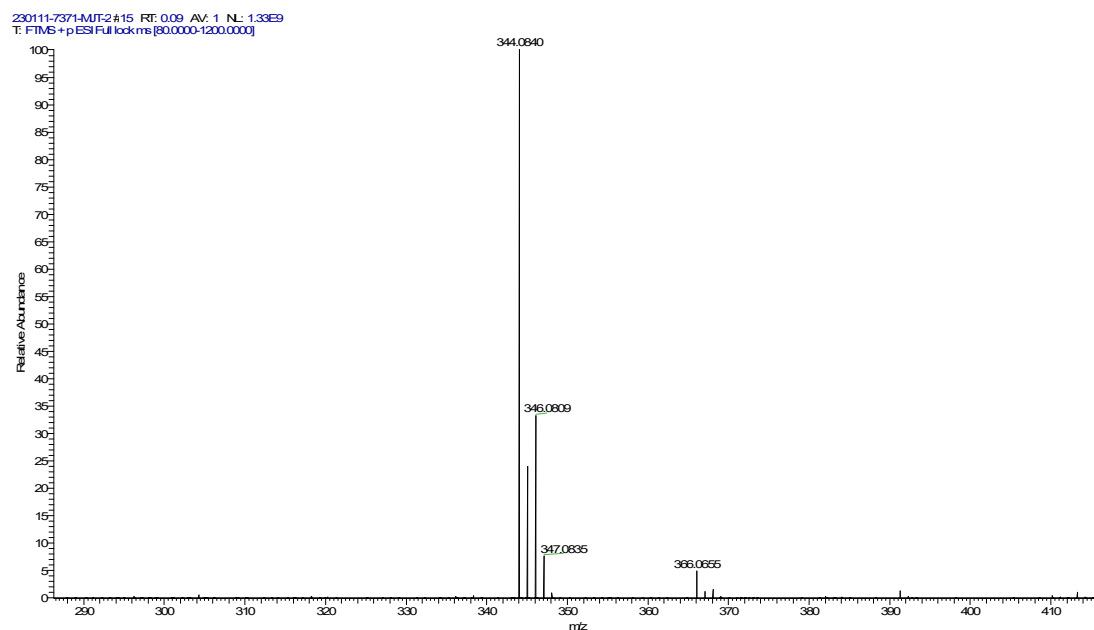

**(6-bromo-3-phenylquinolin-2-yl)(phenyl)methanone (3o)** HRMS (ESI) m/z calcd for  $C_{22}H_{15}BrNO^+$  (M+H)<sup>+</sup> 388.0332, found 388.0334.

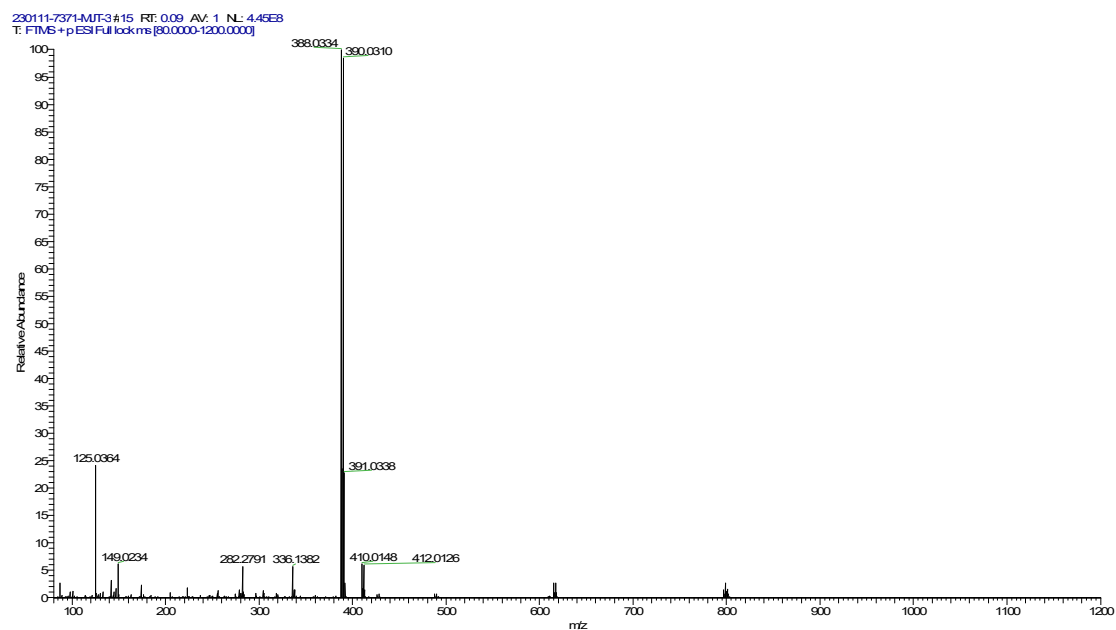

**(6-iodo-3-phenylquinolin-2-yl)(phenyl)methanone (3p)** HRMS (ESI) m/z calcd for  $C_{22}H_{15}INO^+$  (M+H)<sup>+</sup> 436.0193, found 436.0192.

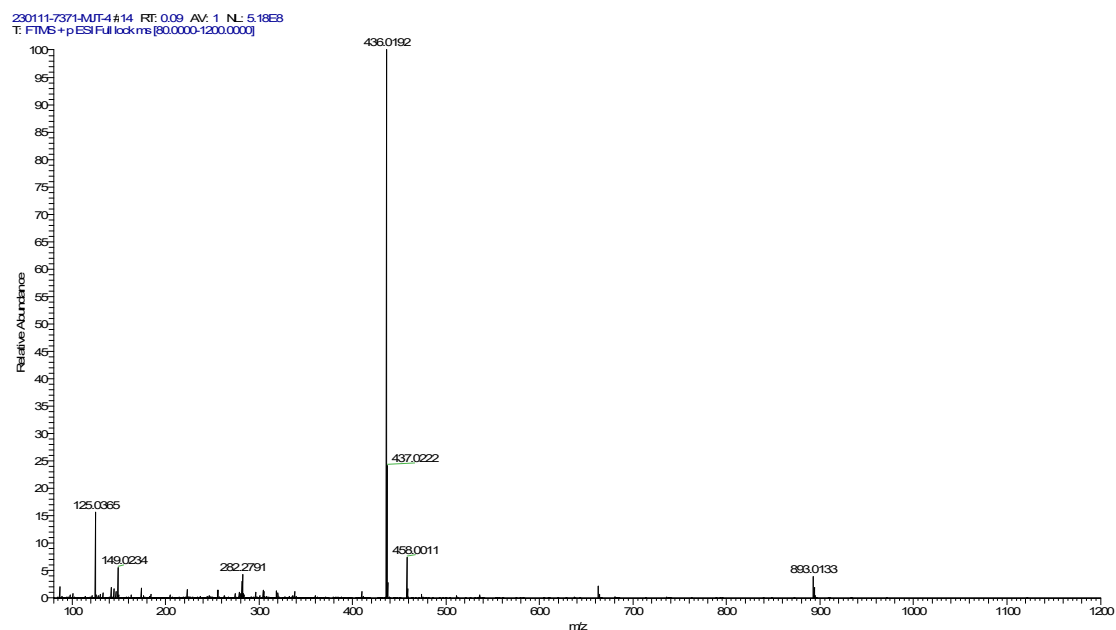

**(6-fluoro-7-methoxy-3-phenylquinolin-2-yl)(phenyl)methanone (3q)** HRMS (ESI)  
m/z calcd for  $C_{23}H_{17}FNO_2^+$  (M+H)<sup>+</sup> 358.1238, found 358.1235.

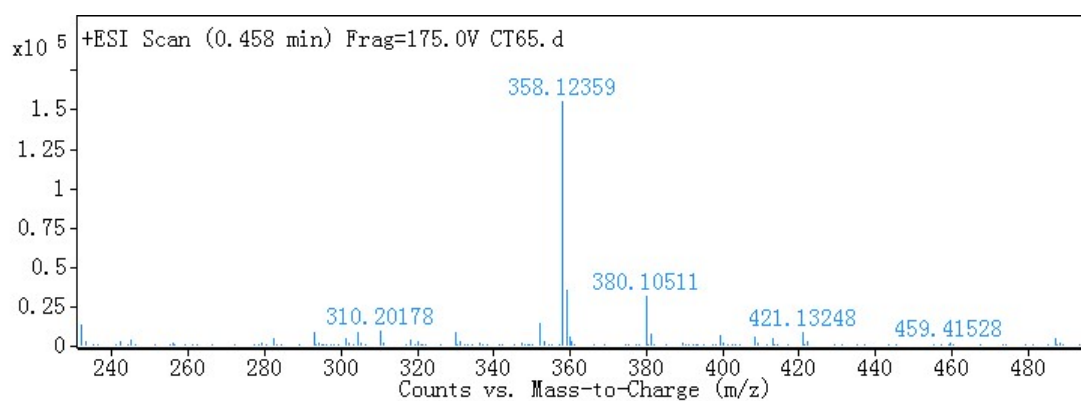

**(6-chloro-7-methoxy-3-phenylquinolin-2-yl)(phenyl)methanone (3r)** HRMS (ESI)  
m/z calcd for  $C_{23}H_{17}ClNO_2^+$  (M+H)<sup>+</sup> 374.0942, found 374.0940.

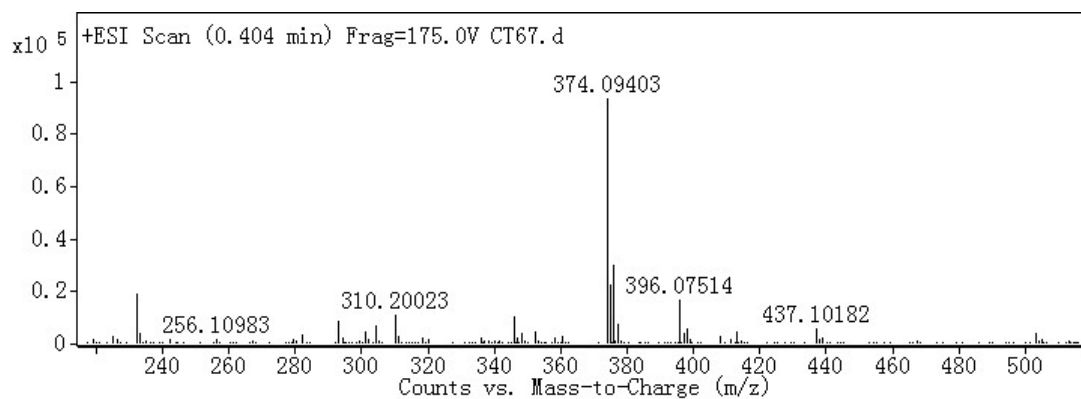

**ethyl 2-benzoyl-3-phenylquinoline-6-carboxylate (3s)** HRMS (ESI) m/z calcd for  $C_{25}H_{20}NO_3^+$  (M+H)<sup>+</sup> 382.1438, found 382.1436.

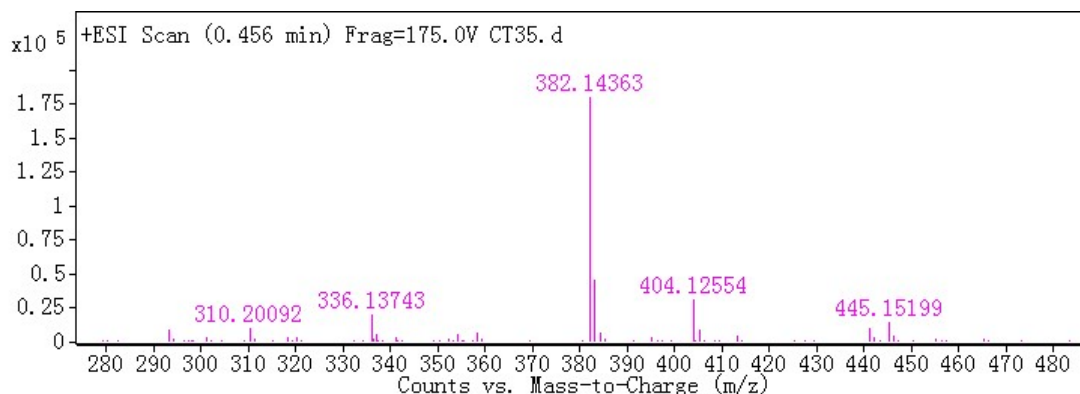

**(3,6-diphenylquinolin-2-yl)(phenyl)methanone (3t)** HRMS (ESI) m/z calcd for  $C_{28}H_{20}NO^+$  (M+H)<sup>+</sup> 386.1539, found 386.1538.

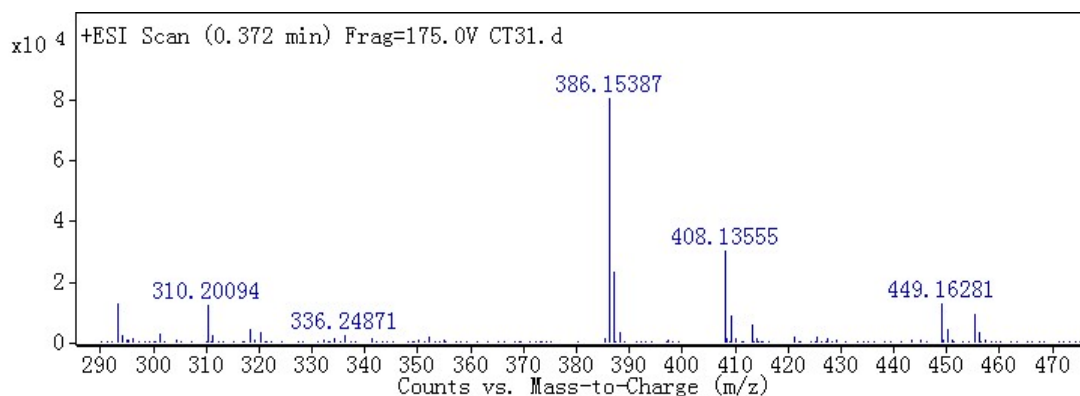

**(6-(methylthio)-3-phenylquinolin-2-yl)(phenyl)methanone (3u)** HRMS (ESI) m/z calcd for  $C_{23}H_{18}NOS^+$  (M+H)<sup>+</sup> 356.1104, found 356.1100.

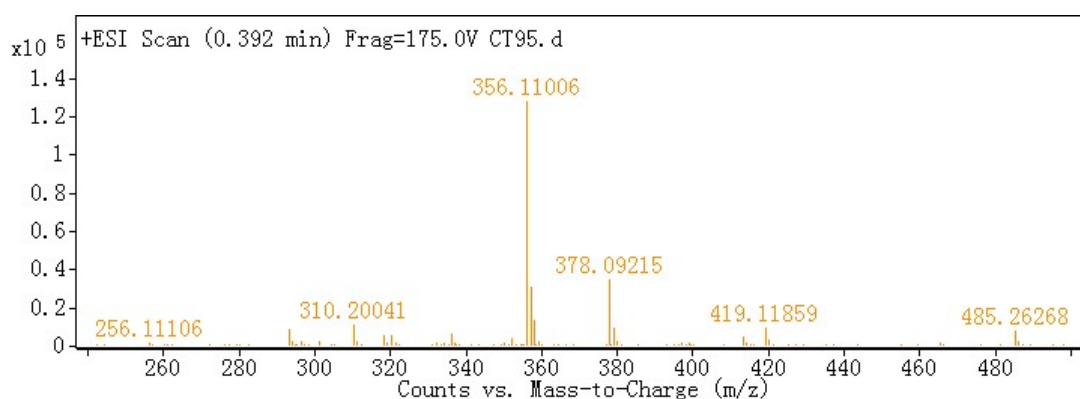

**(6-methyl-3-(p-tolyl)quinolin-2-yl)(p-tolyl)methanone (3v)** HRMS (ESI) m/z calcd for  $C_{25}H_{22}NO^+$  (M+H)<sup>+</sup> 352.1696, found 352.1694.

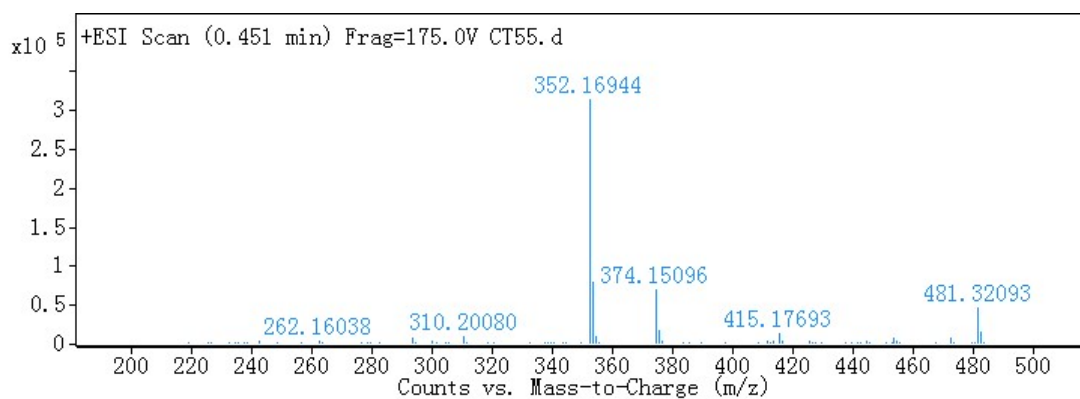

**(4-fluorophenyl)(3-(4-fluorophenyl)-6-methylquinolin-2-yl)methanone (3w)**

HRMS (ESI) m/z calcd for C<sub>23</sub>H<sub>16</sub>F<sub>2</sub>NO<sup>+</sup> (M+H)<sup>+</sup> 360.1194, found 360.1193.

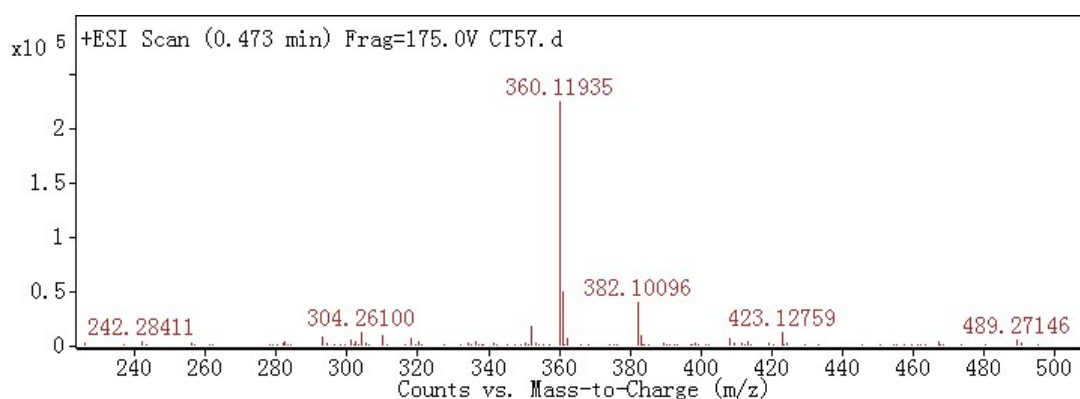

**(4-chlorophenyl)(3-(4-chlorophenyl)-6-methylquinolin-2-yl)methanone (3x)**

HRMS (ESI) m/z calcd for C<sub>23</sub>H<sub>16</sub>Cl<sub>2</sub>NO<sup>+</sup> (M+H)<sup>+</sup> 392.0603, found 392.0601.

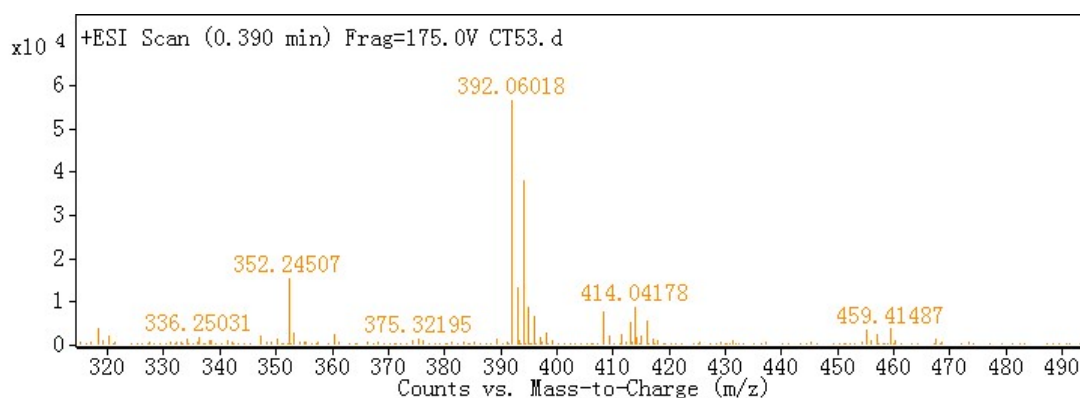

**(4-bromophenyl)(3-(4-bromophenyl)-6-methylquinolin-2-yl)methanone (3y)**

HRMS (ESI) m/z calcd for C<sub>23</sub>H<sub>16</sub>Br<sub>2</sub>NO<sup>+</sup> (M+H)<sup>+</sup> 481.9573, found 481.9569.

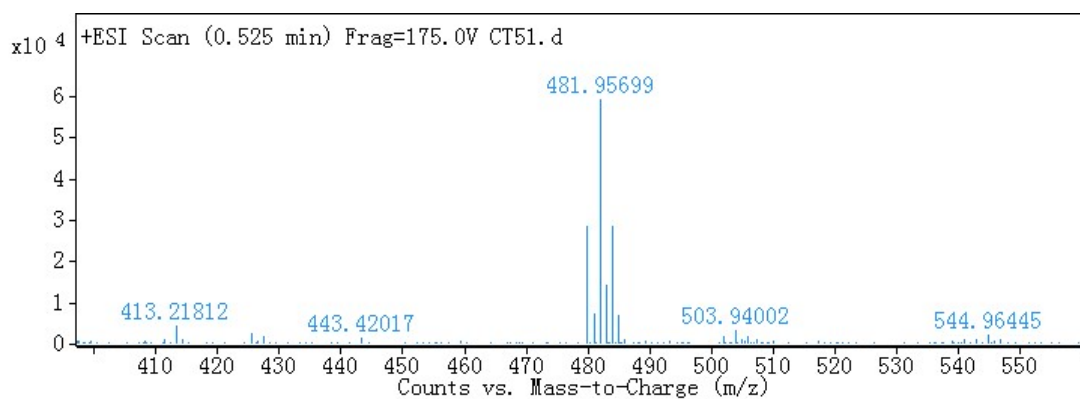

**(4-iodophenyl)(3-(4-iodophenyl)-6-methylquinolin-2-yl)methanone (3z)** HRMS (ESI) m/z calcd for  $C_{23}H_{16}I_2NO^+$  (M+H)<sup>+</sup> 575.9316, found 575.9311.

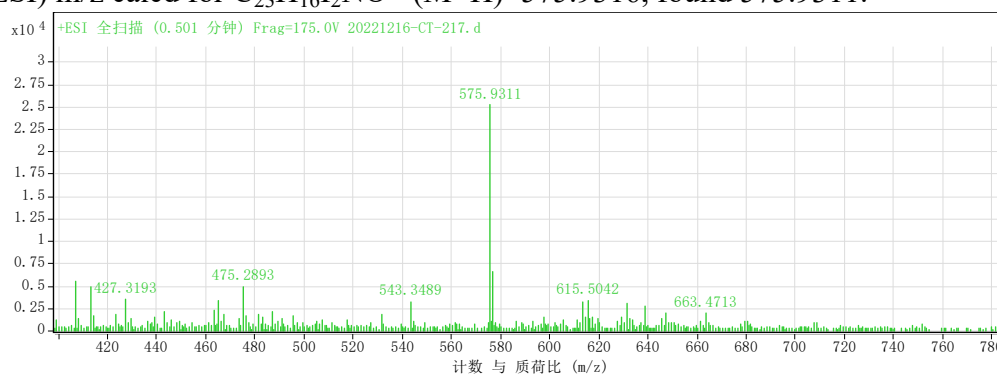

**(2-fluorophenyl)(3-(2-fluorophenyl)-6-methoxyquinolin-2-yl)methanone (3aa)** HRMS (ESI) m/z calcd for  $C_{23}H_{16}F_2NO_2^+$  (M+H)<sup>+</sup> 376.1144, found 376.1141.

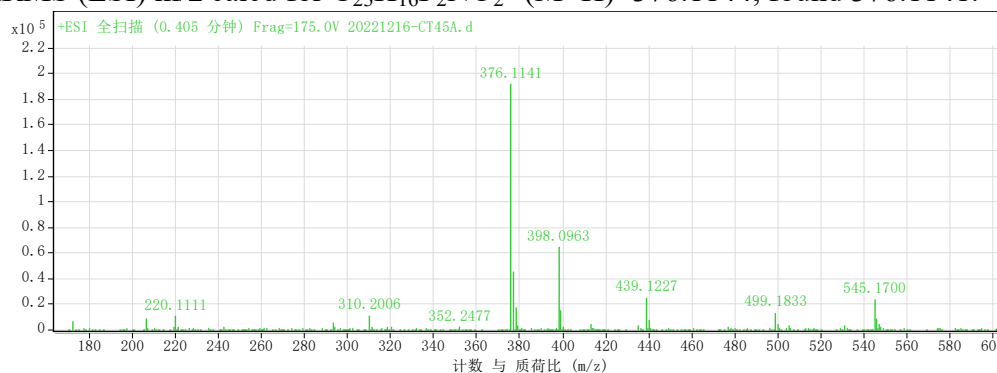

**(3,4-dichlorophenyl)(3-(3,4-dichlorophenyl)-6-methylquinolin-2-yl)methanone (3ab)** HRMS (ESI) m/z calcd for  $C_{23}H_{14}Cl_4NO^+$  (M+H)<sup>+</sup> 461.9795, found 461.9792.

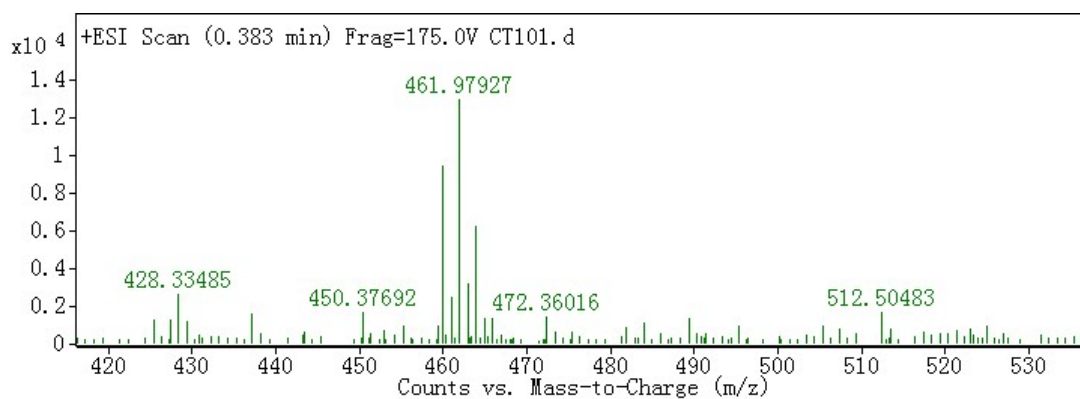

**(3-chlorophenyl)(3-(3-chlorophenyl)-6-methylquinolin-2-yl)methanone (3ac)**  
 HRMS (ESI) m/z calcd for C<sub>23</sub>H<sub>16</sub>Cl<sub>2</sub>NO<sup>+</sup> (M+H)<sup>+</sup> 392.0603, found 392.0598.

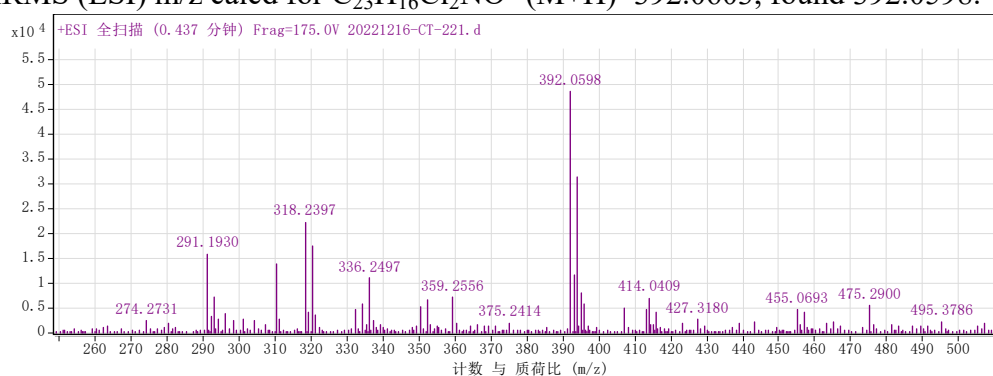

**(4-(benzyloxy)phenyl)(3-(4-(benzyloxy)phenyl)-6-methylquinolin-2-yl)methanone (3ad)**  
 HRMS (ESI) m/z calcd for C<sub>37</sub>H<sub>30</sub>NO<sub>3</sub><sup>+</sup> (M+H)<sup>+</sup> 536.2220, found 536.2221.

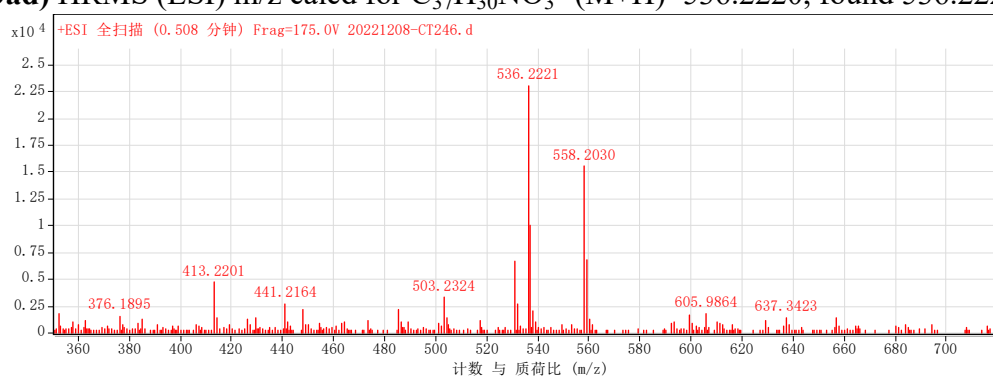

**(6-methyl-3-(naphthalen-1-yl)quinolin-2-yl)(naphthalen-1-yl)methanone (3ae)**  
 HRMS (ESI) m/z calcd for C<sub>31</sub>H<sub>22</sub>NO<sup>+</sup> (M+H)<sup>+</sup> 424.1696, found 424.1693.

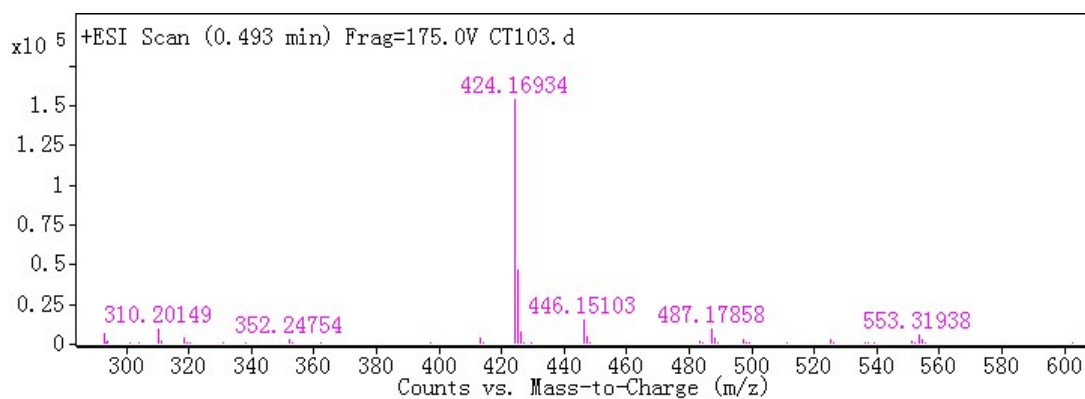

**(6-methyl-3-(naphthalen-2-yl)quinolin-2-yl)(naphthalen-2-yl)methanone (3af)**  
 HRMS (ESI) m/z calcd for C<sub>31</sub>H<sub>22</sub>NO<sup>+</sup> (M+H)<sup>+</sup> 424.1696, found 424.1693.

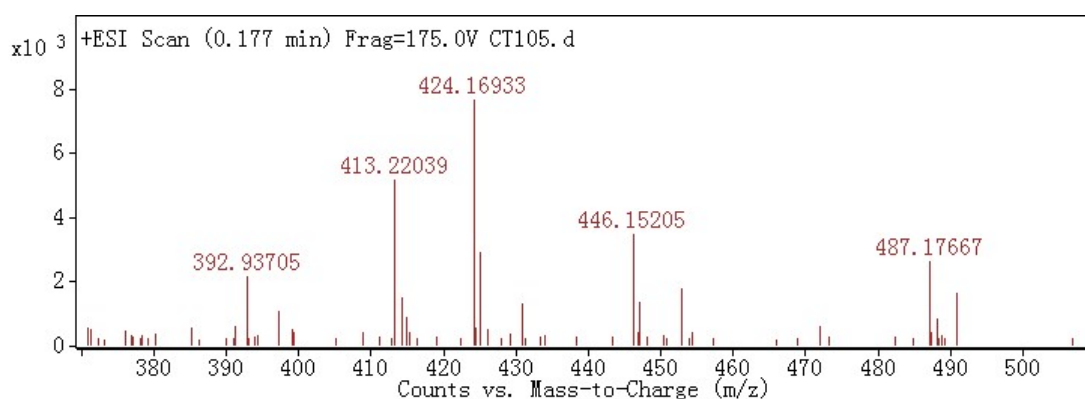

**(4-hydroxyphenyl)(3-(4-hydroxyphenyl)-6-methylquinolin-2-yl)methanone (5ah)**  
 HRMS (ESI) m/z calcd for C<sub>23</sub>H<sub>18</sub>NO<sub>3</sub><sup>+</sup> (M+H)<sup>+</sup> 356.1281, found 356.1278.

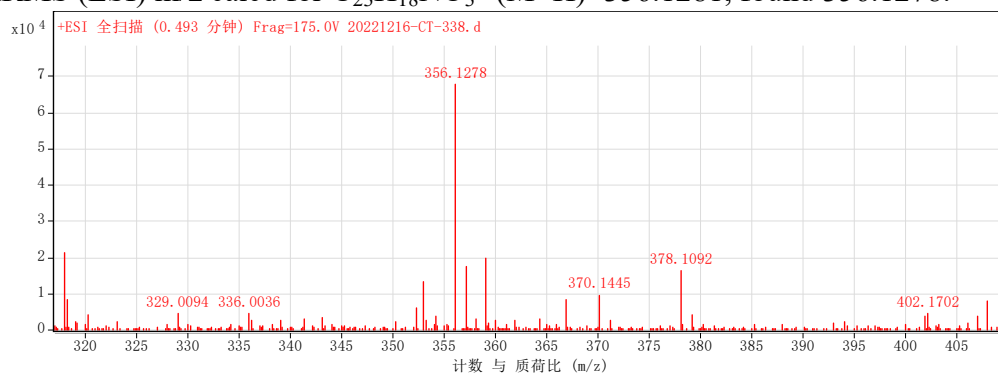

## 7. $^1\text{H}$ and $^{13}\text{C}$ NMR spectra of compounds 3 and 5a

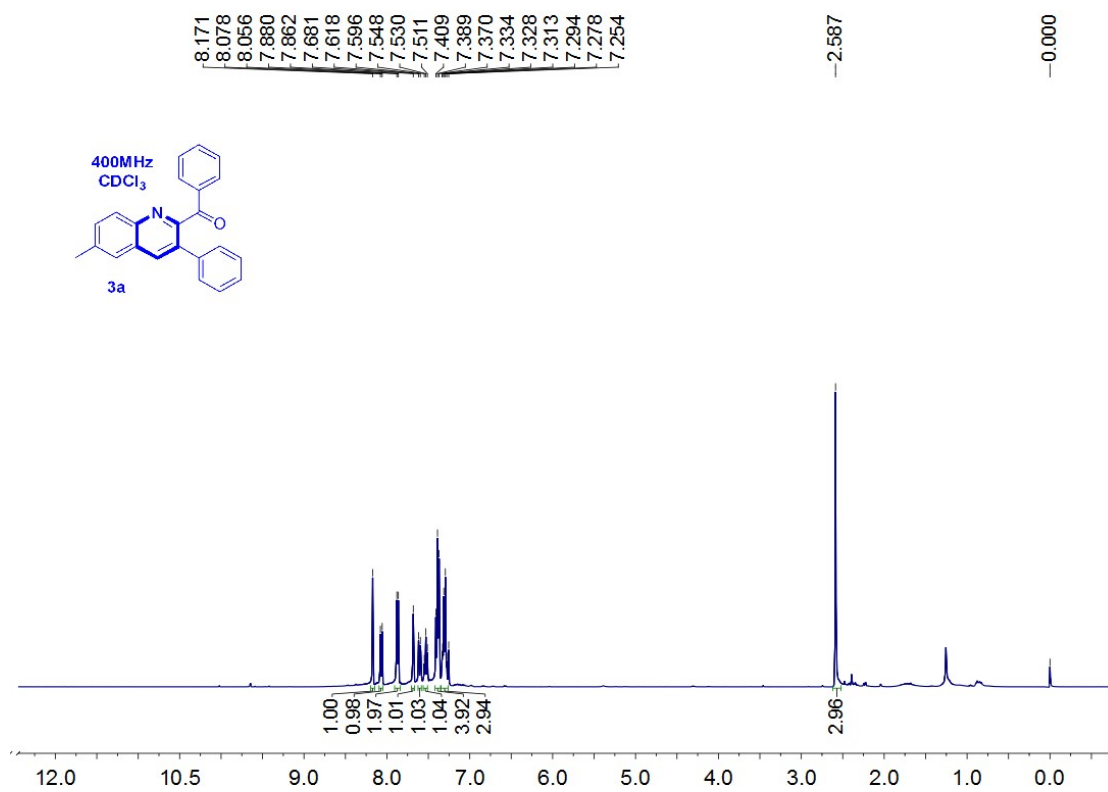



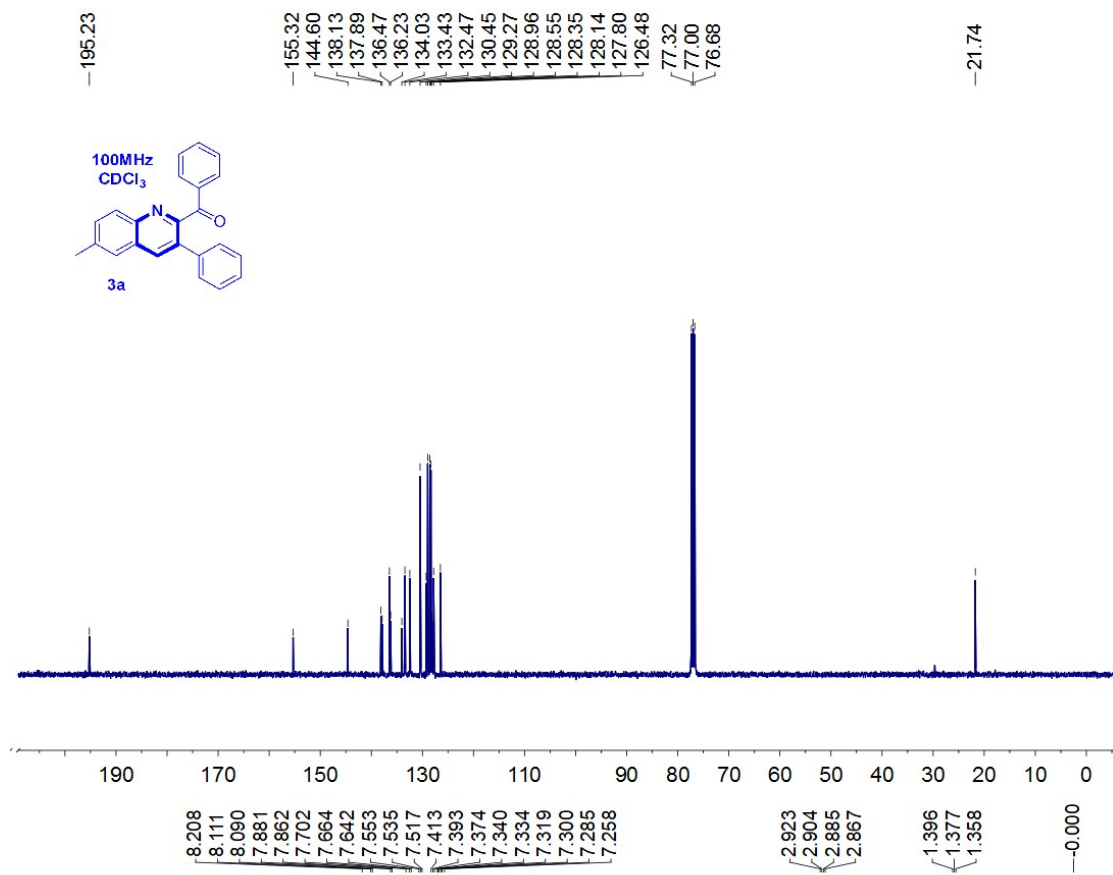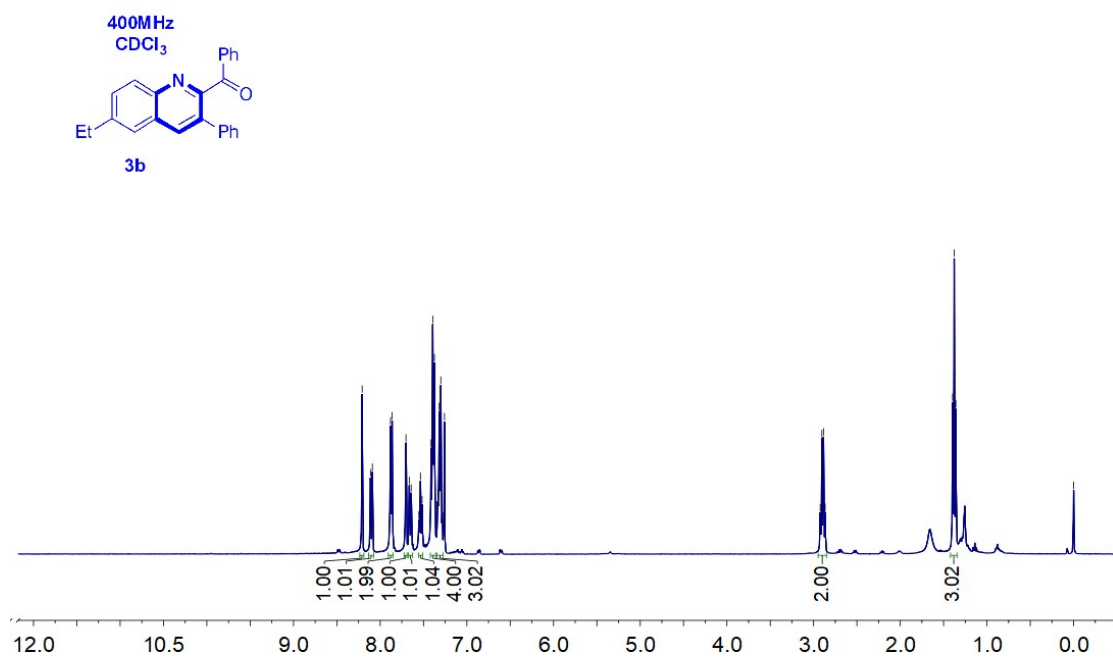

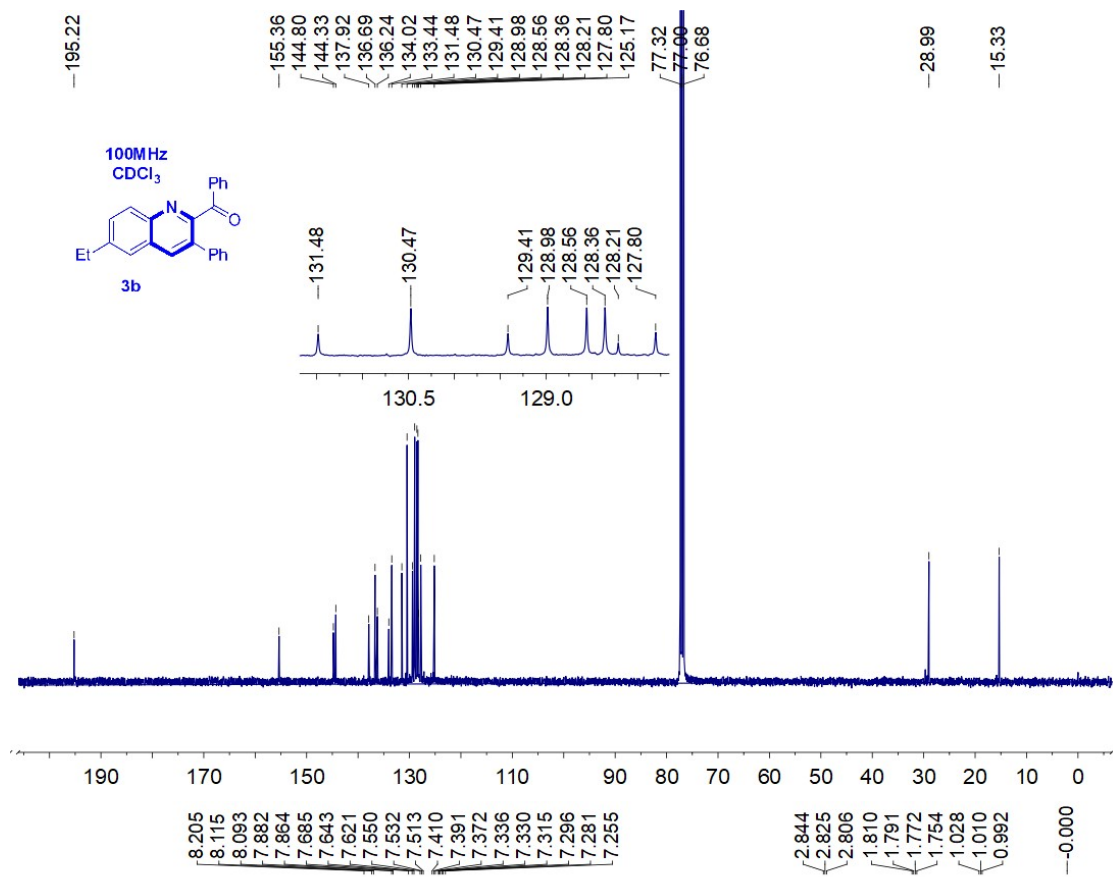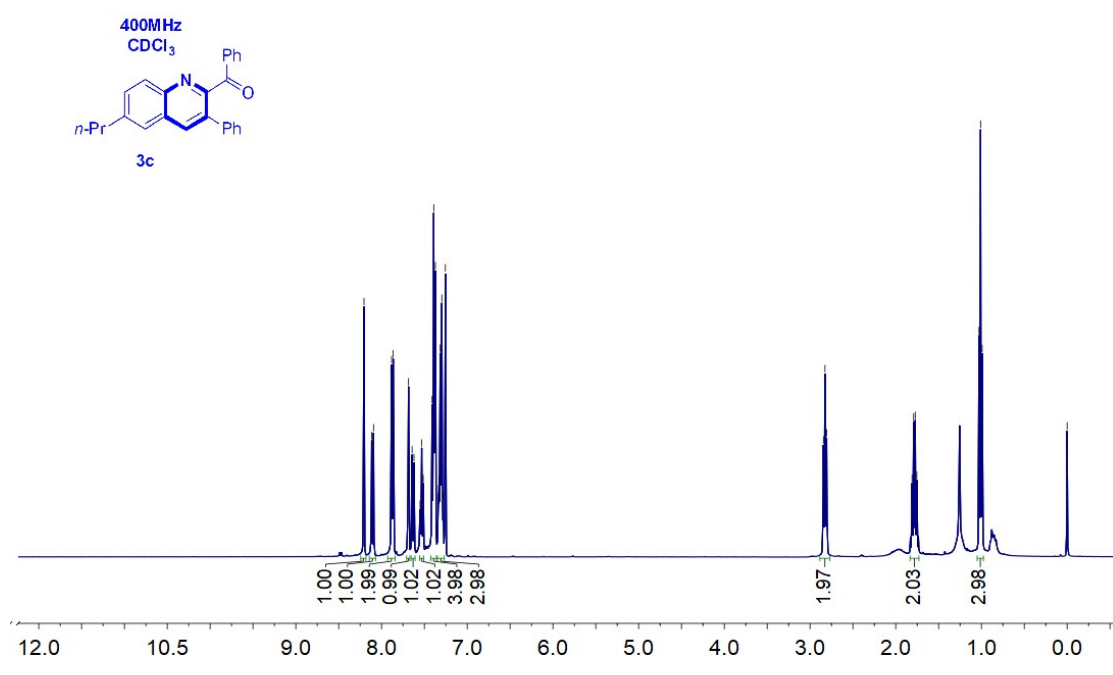

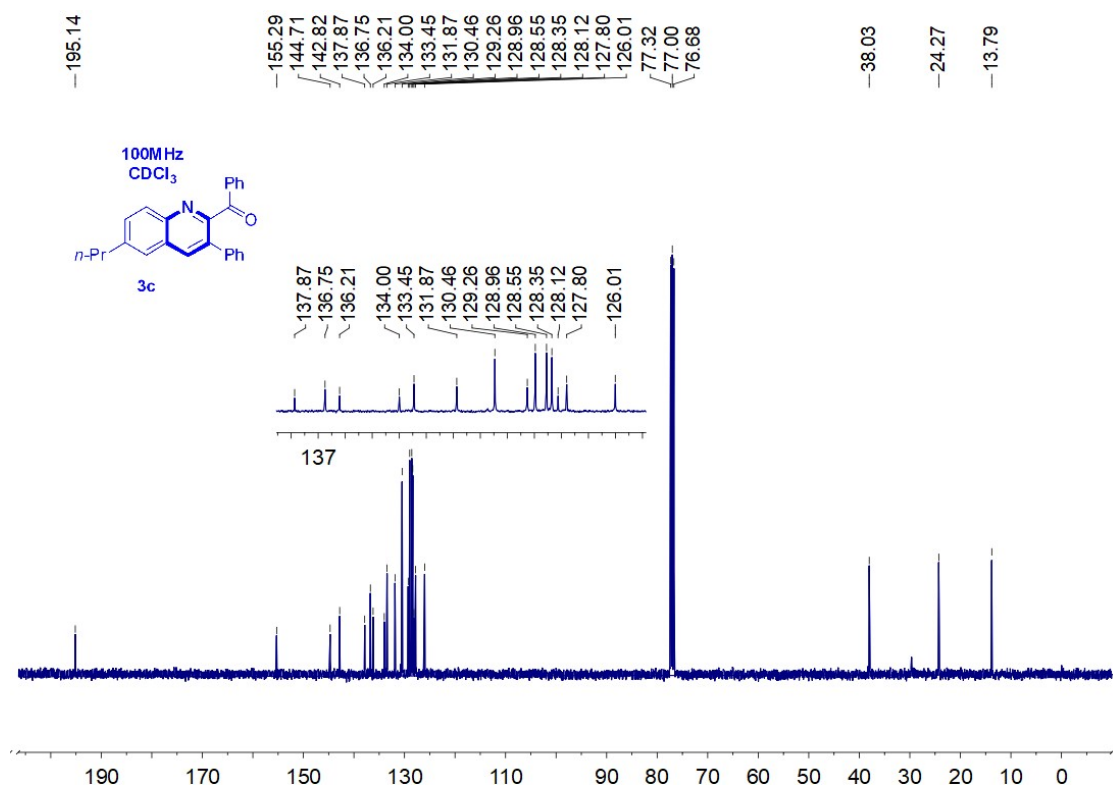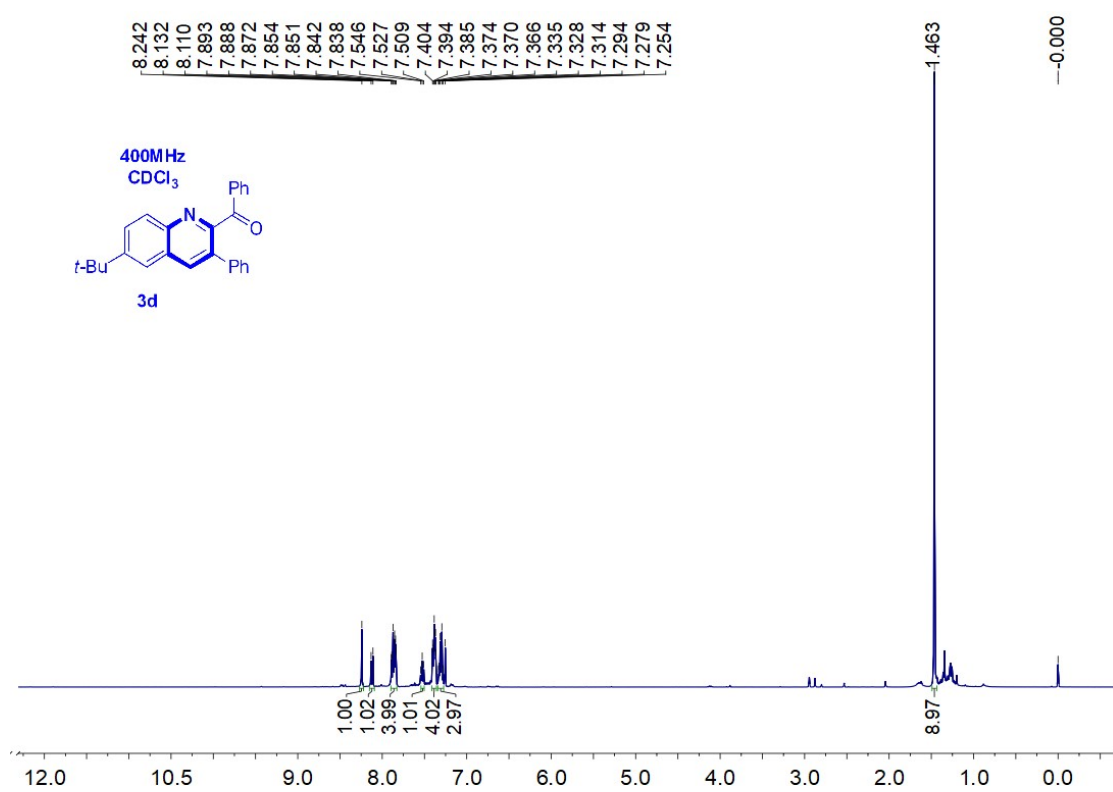

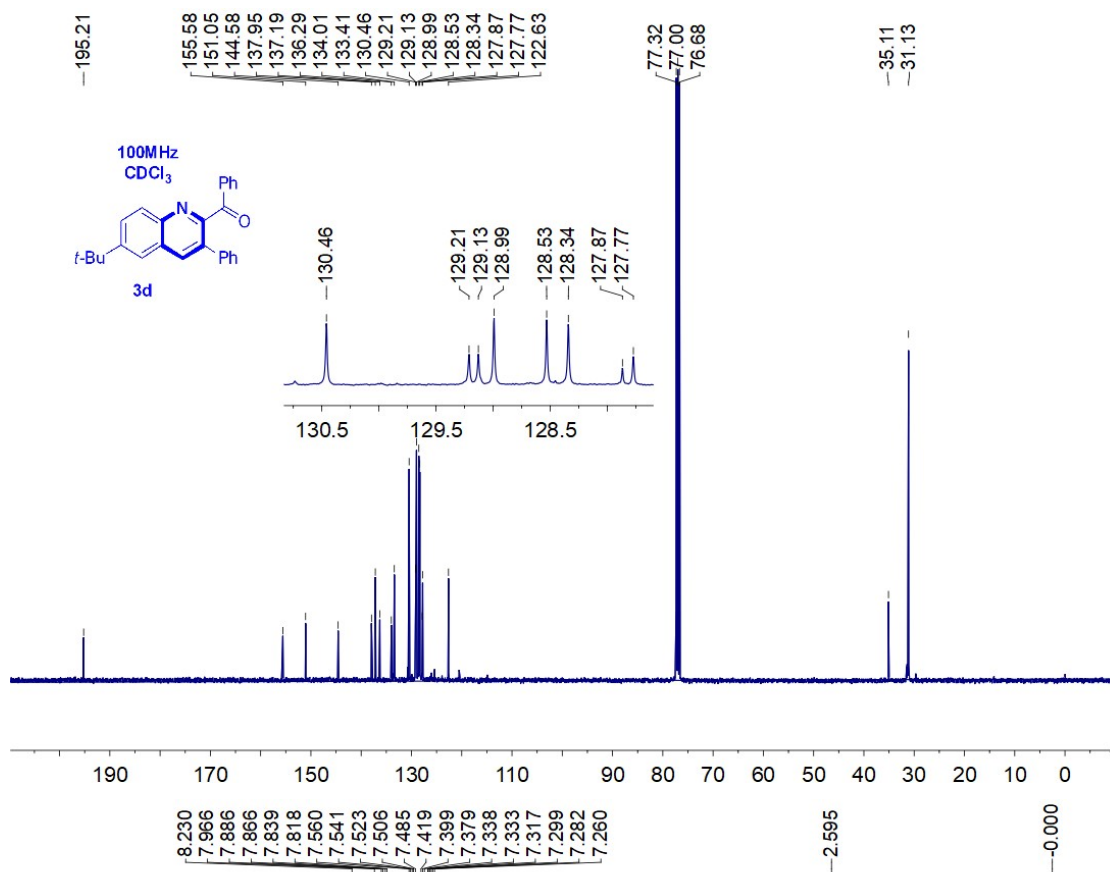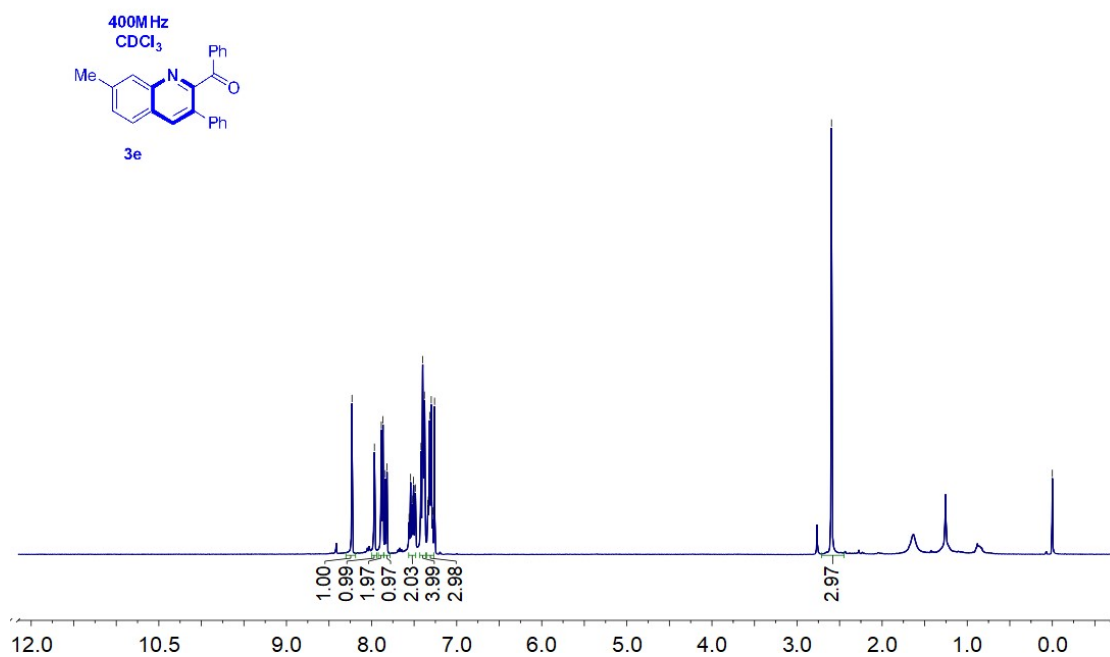

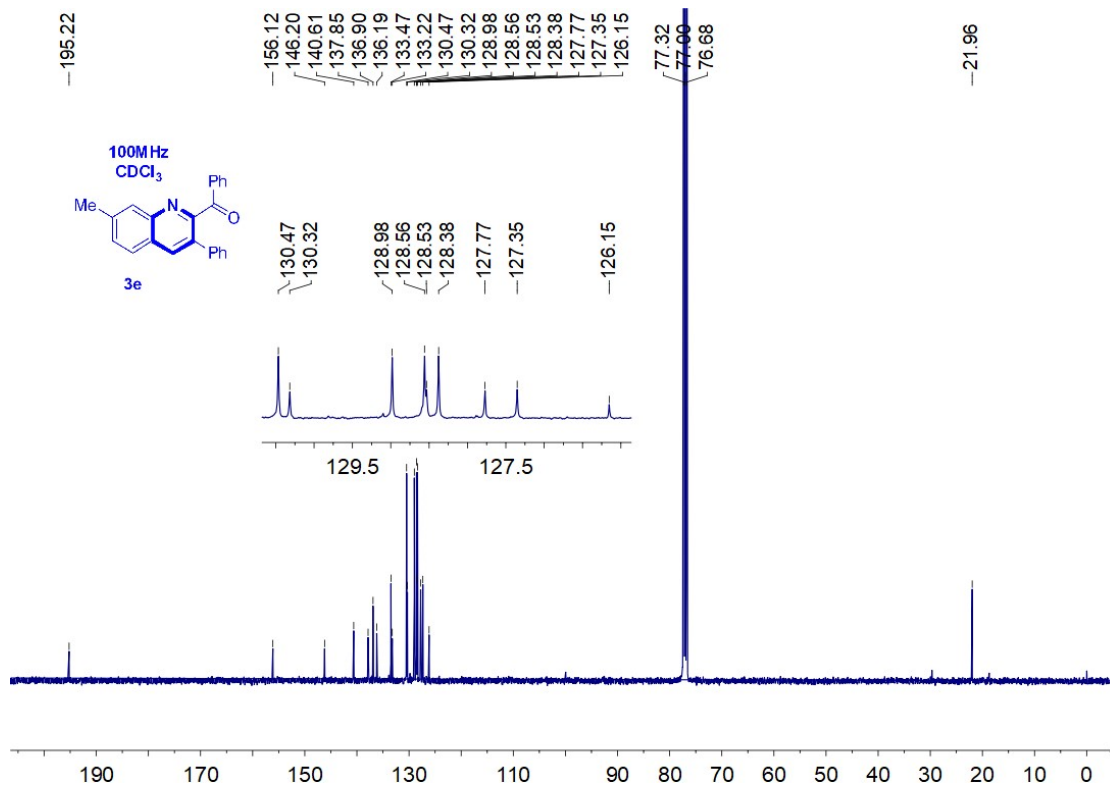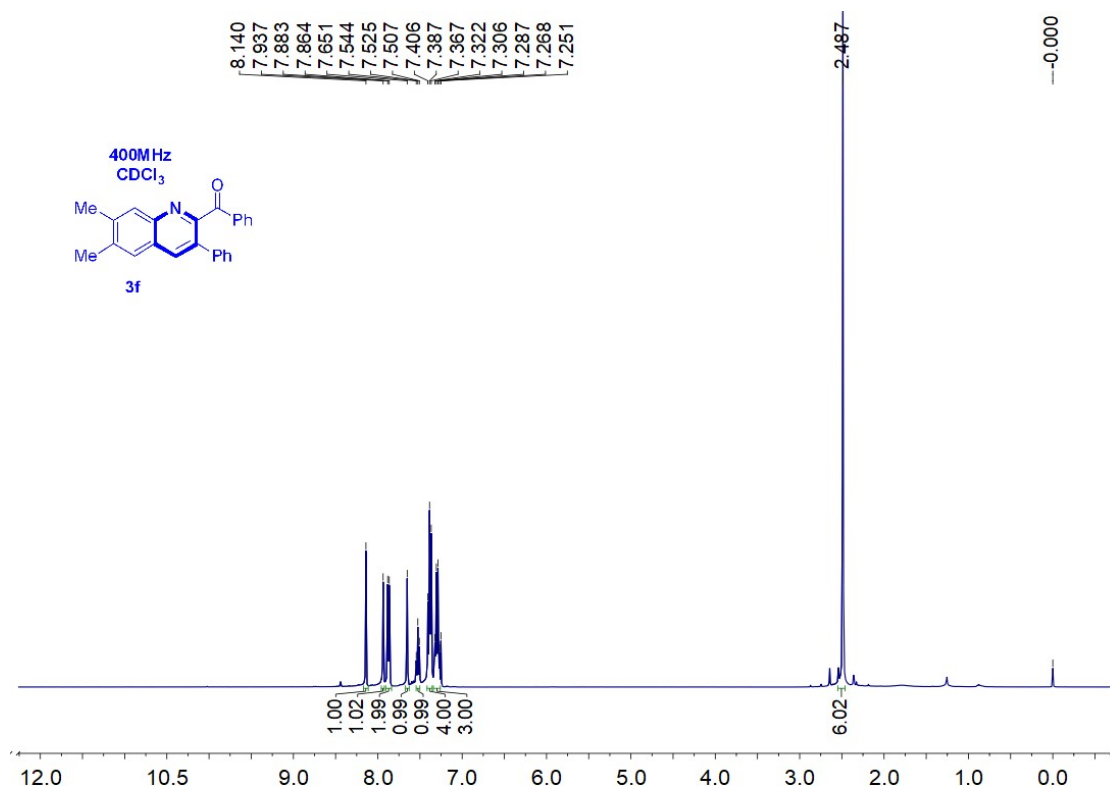

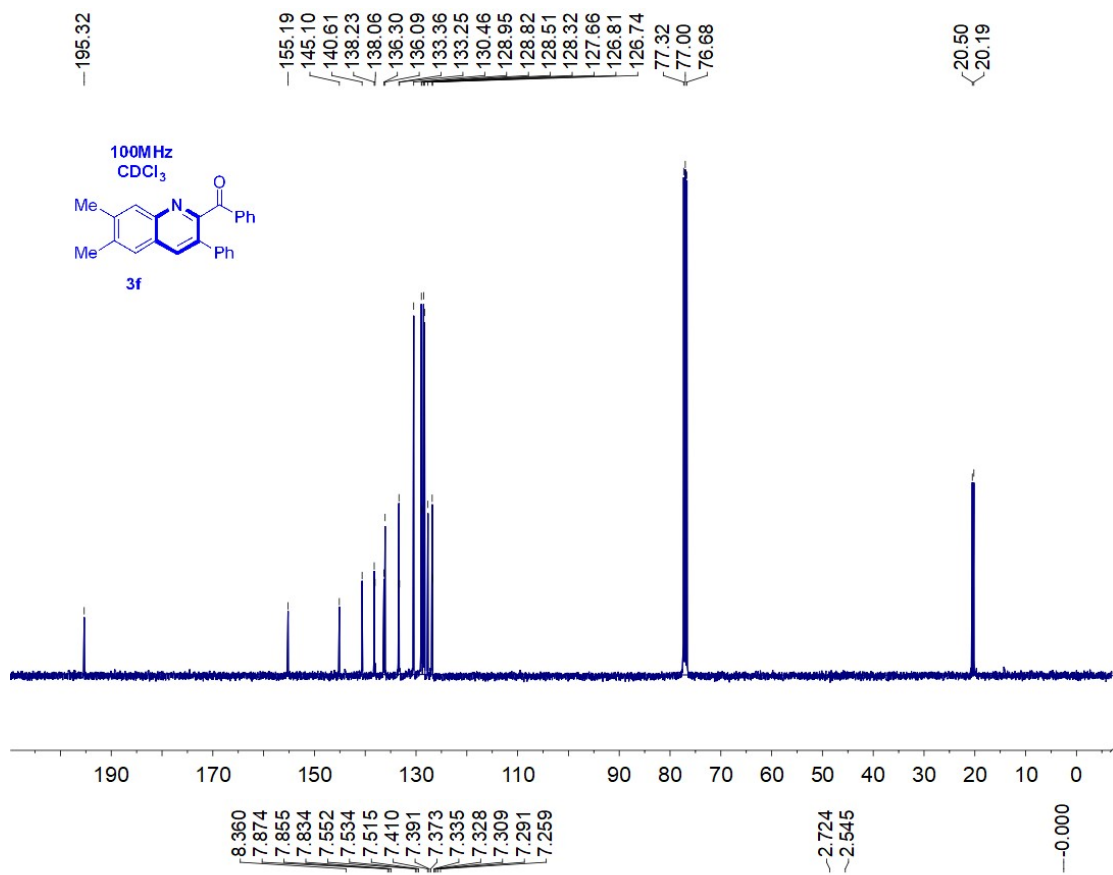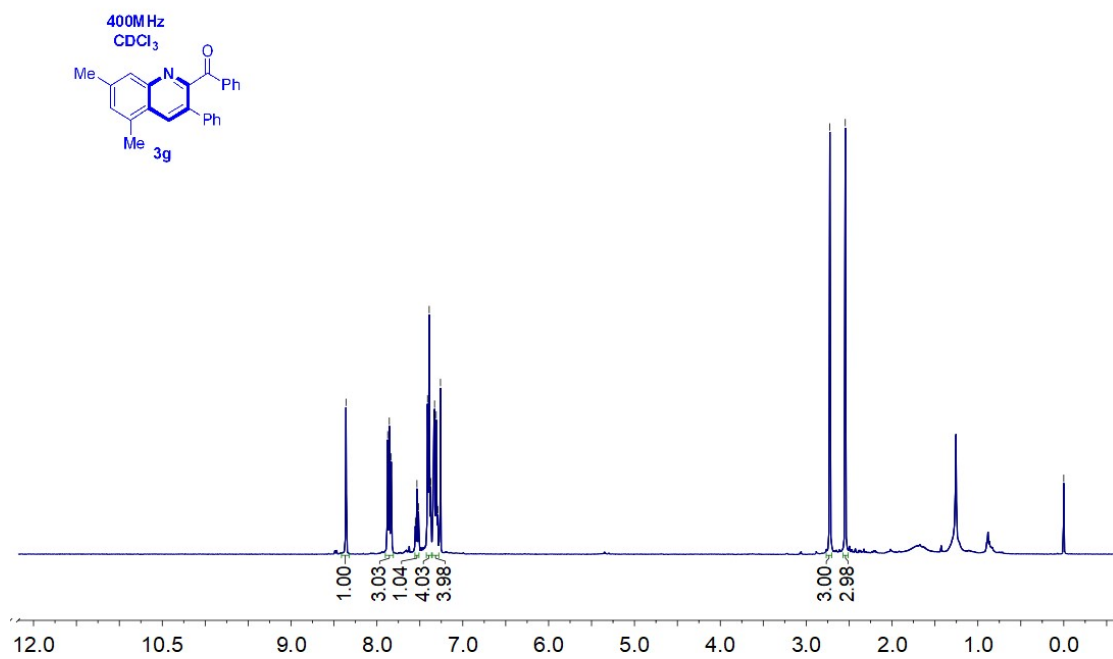

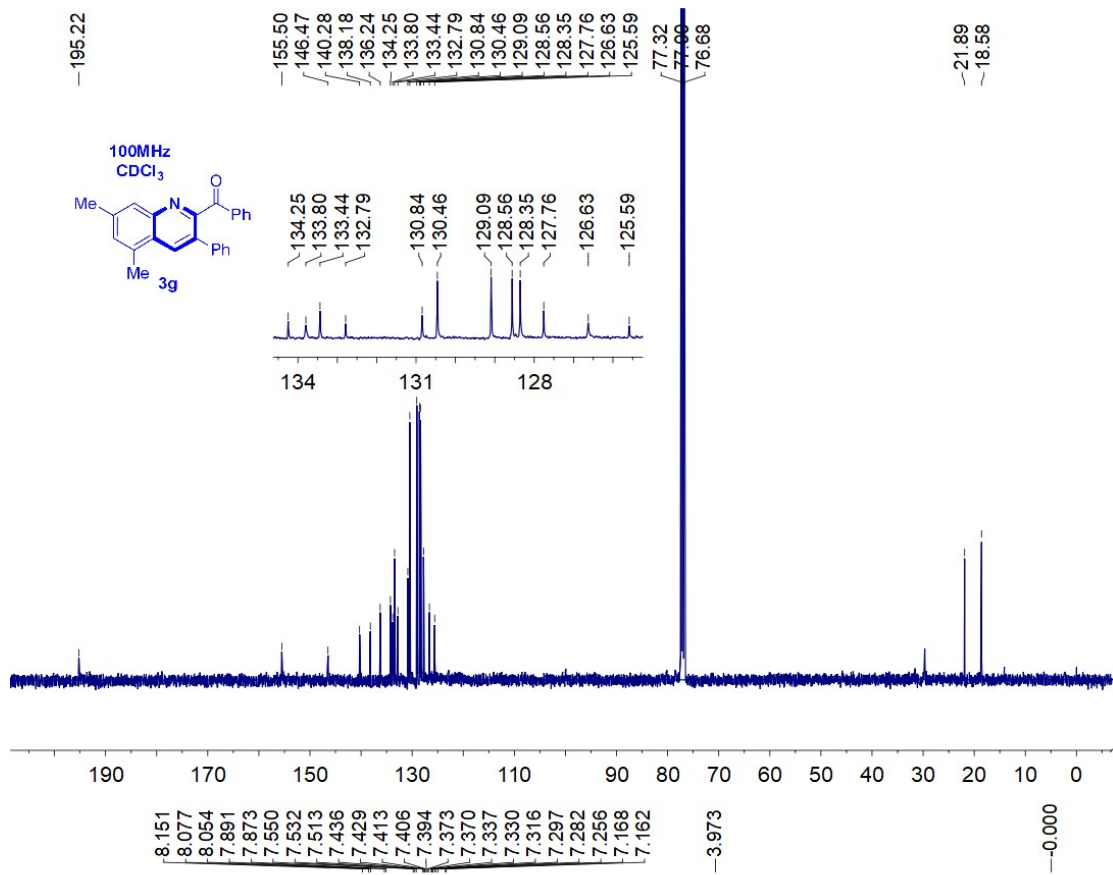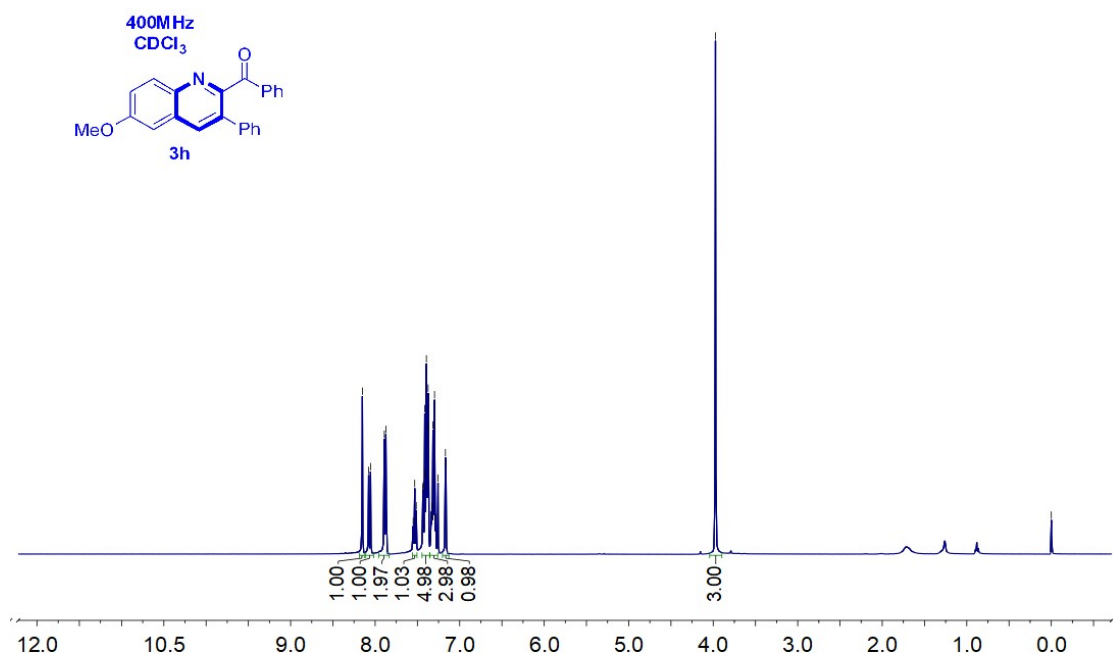

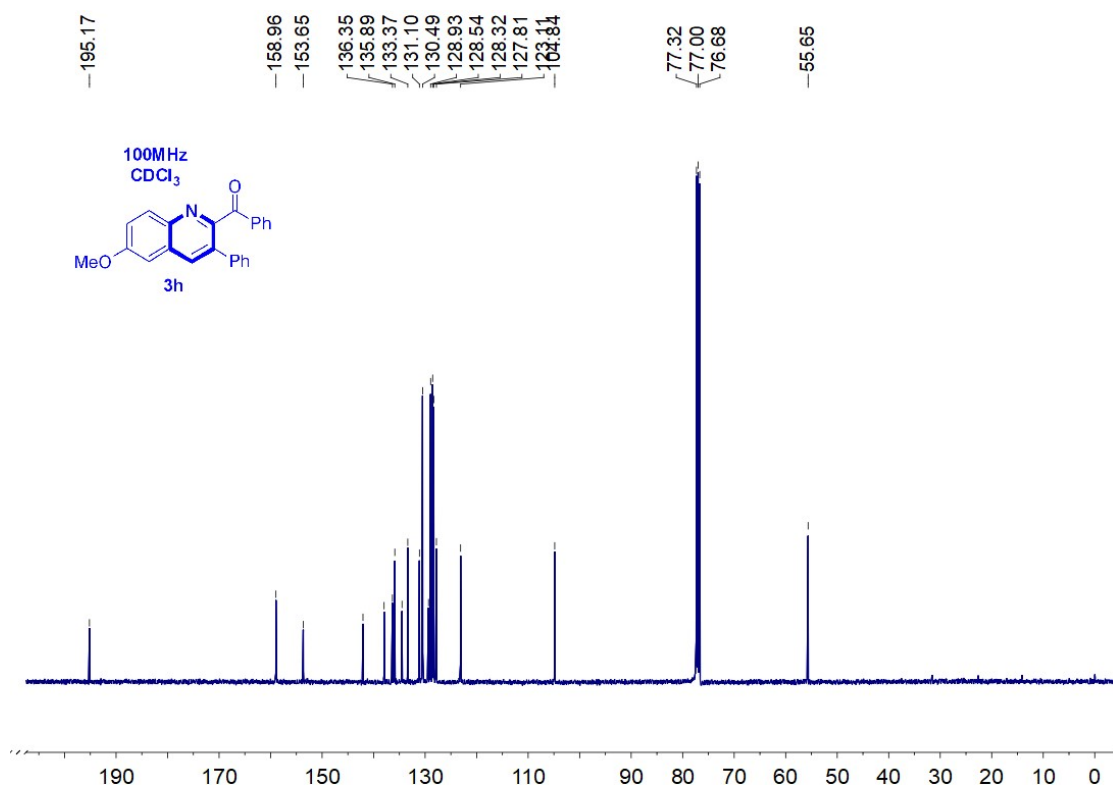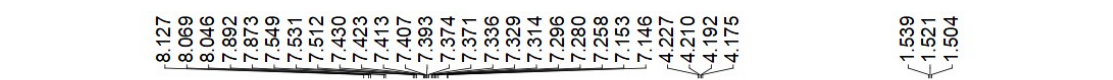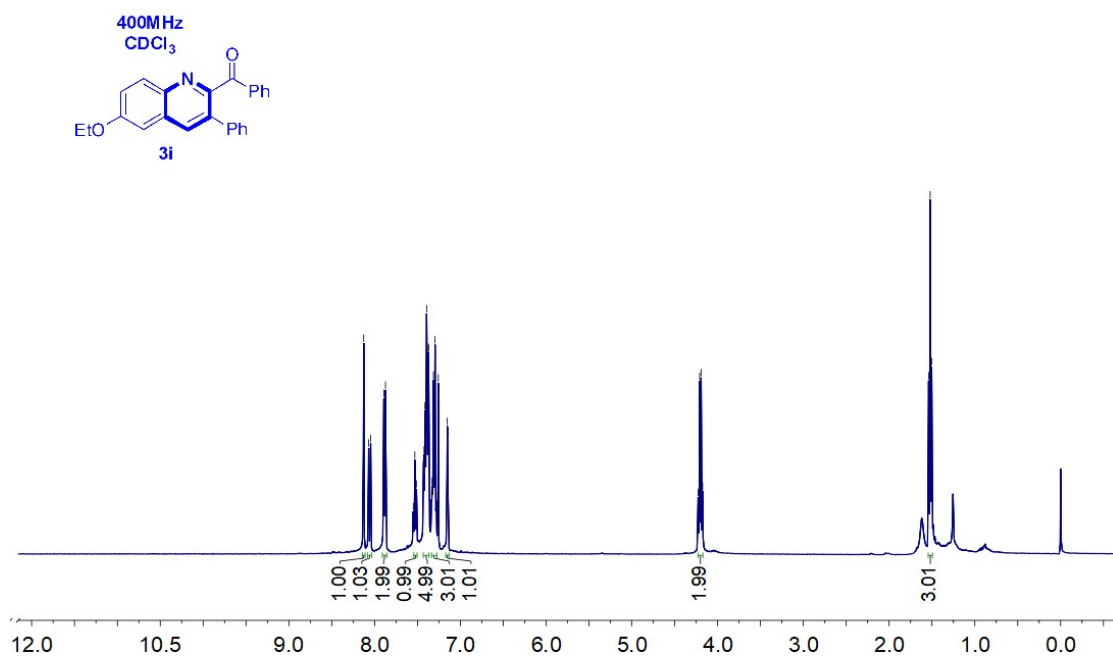



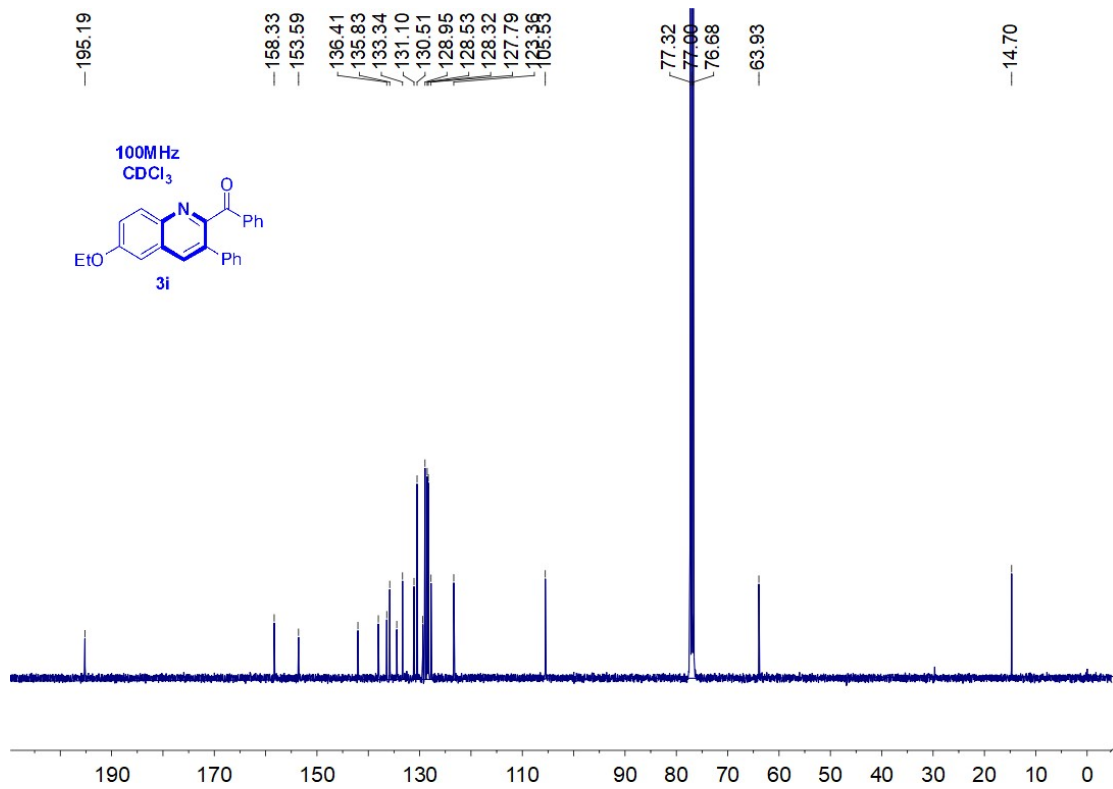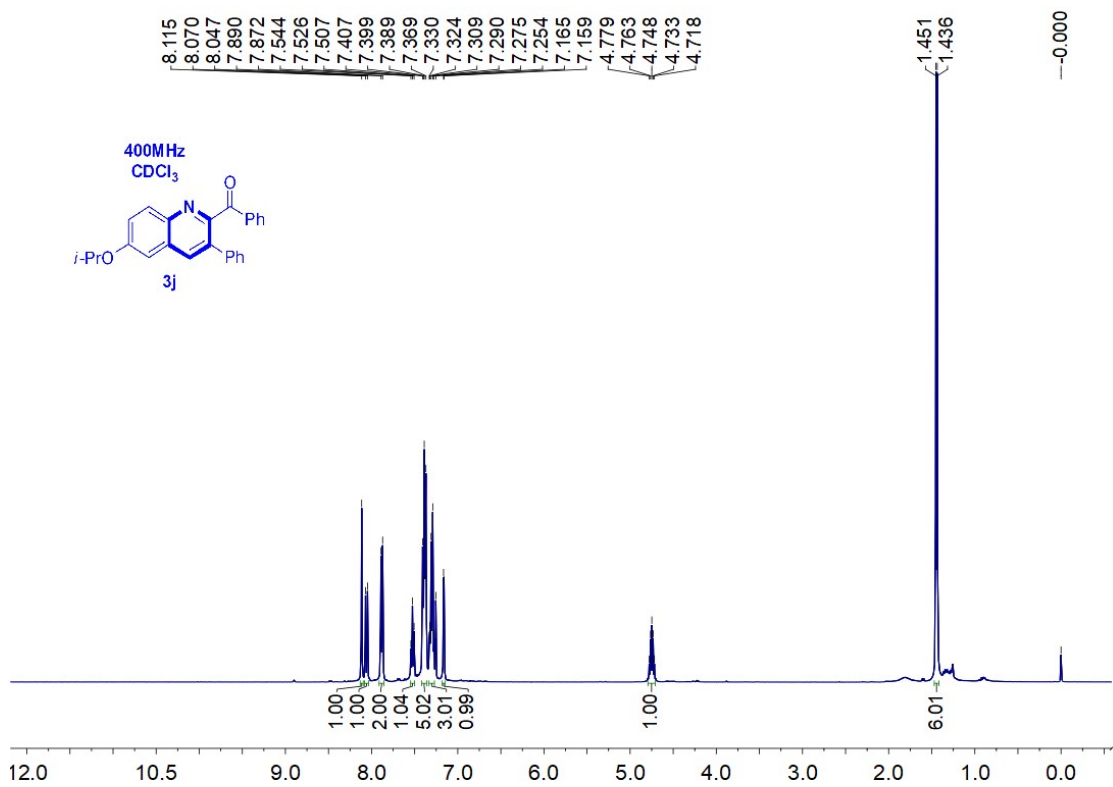

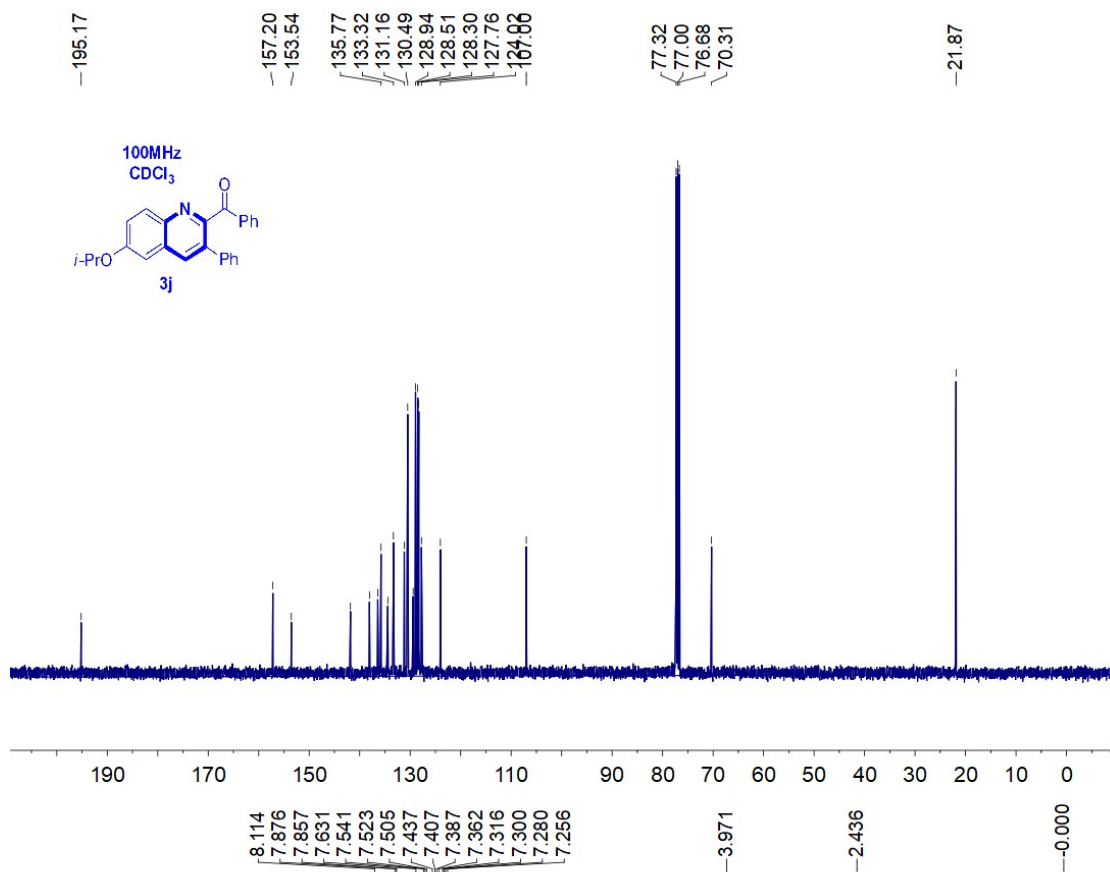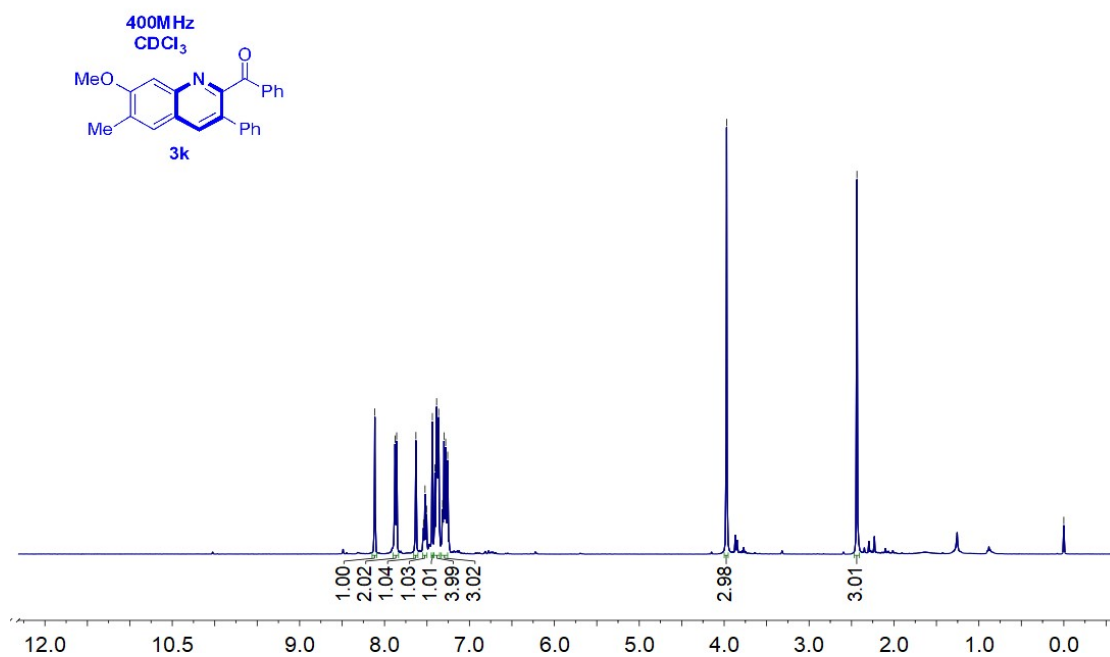

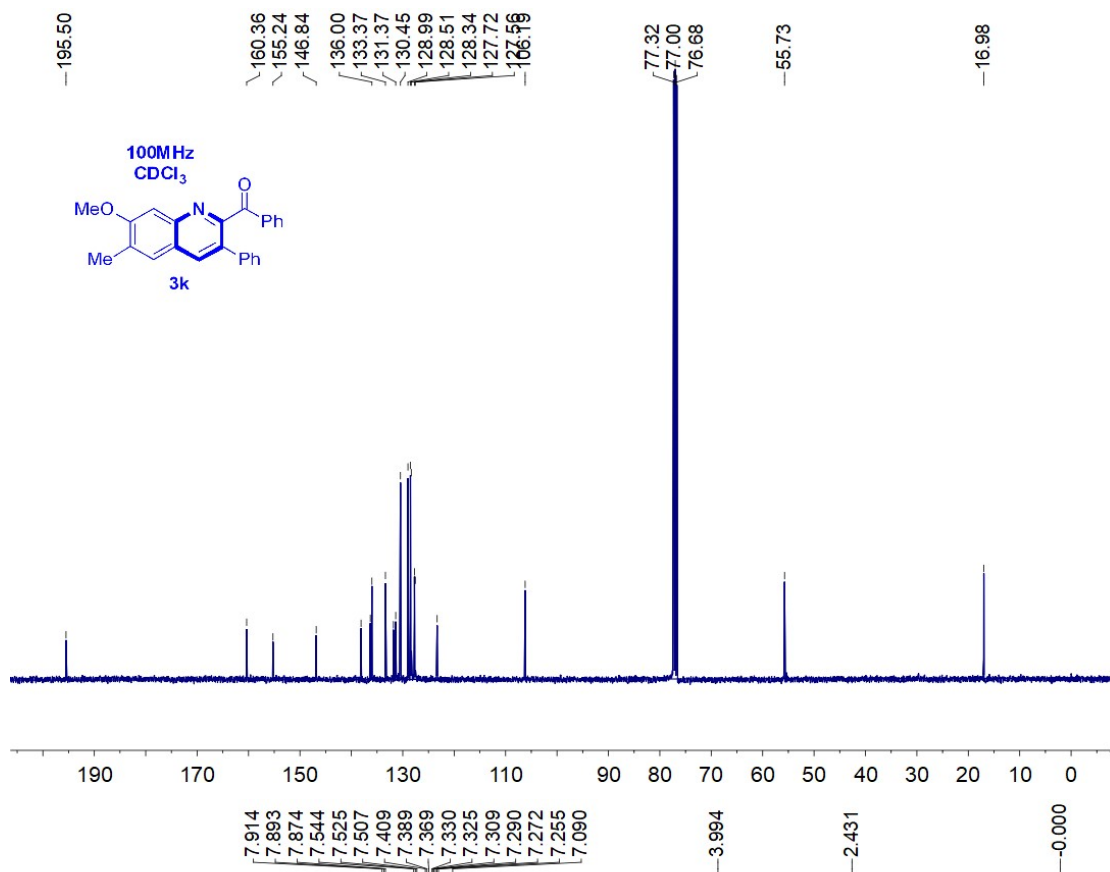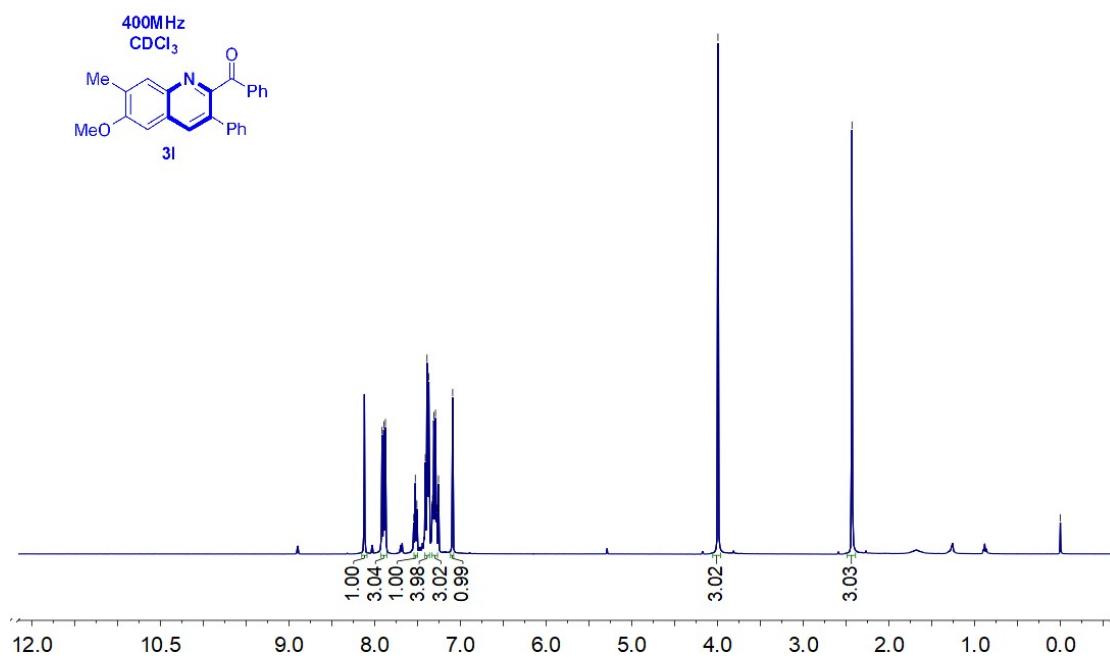

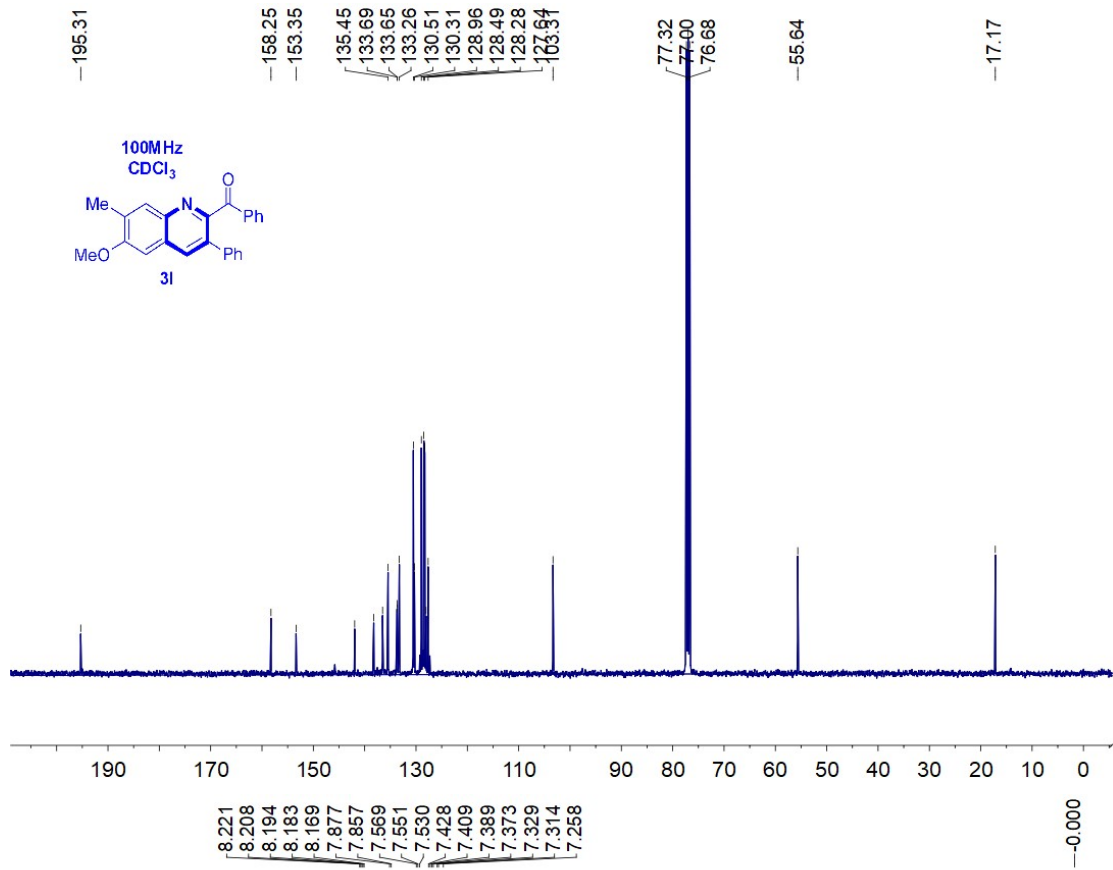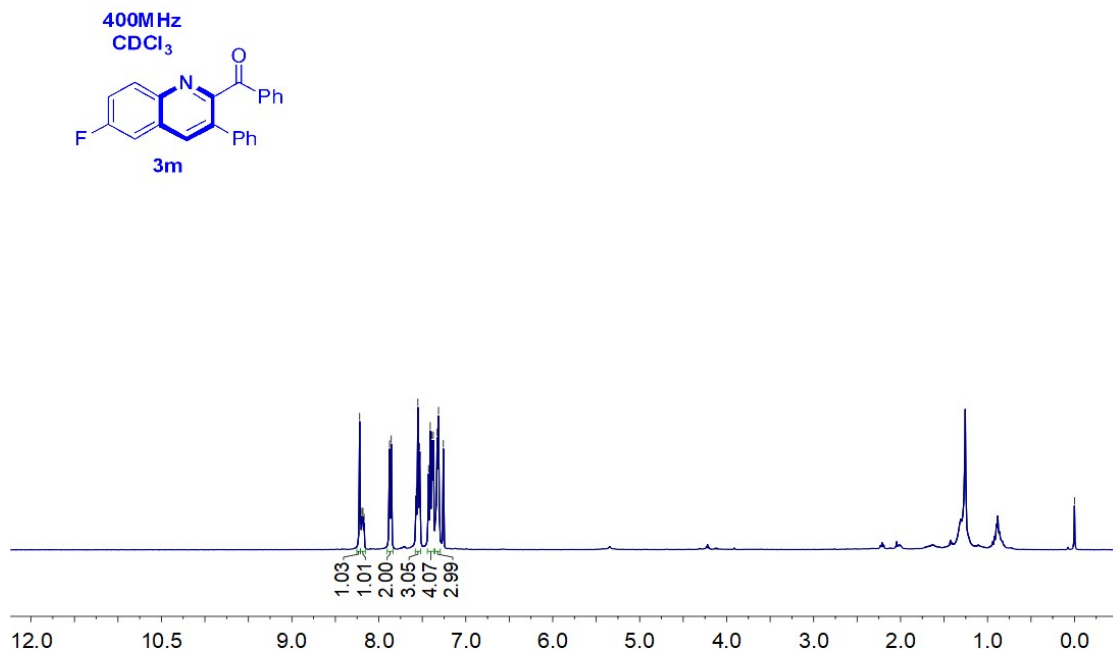

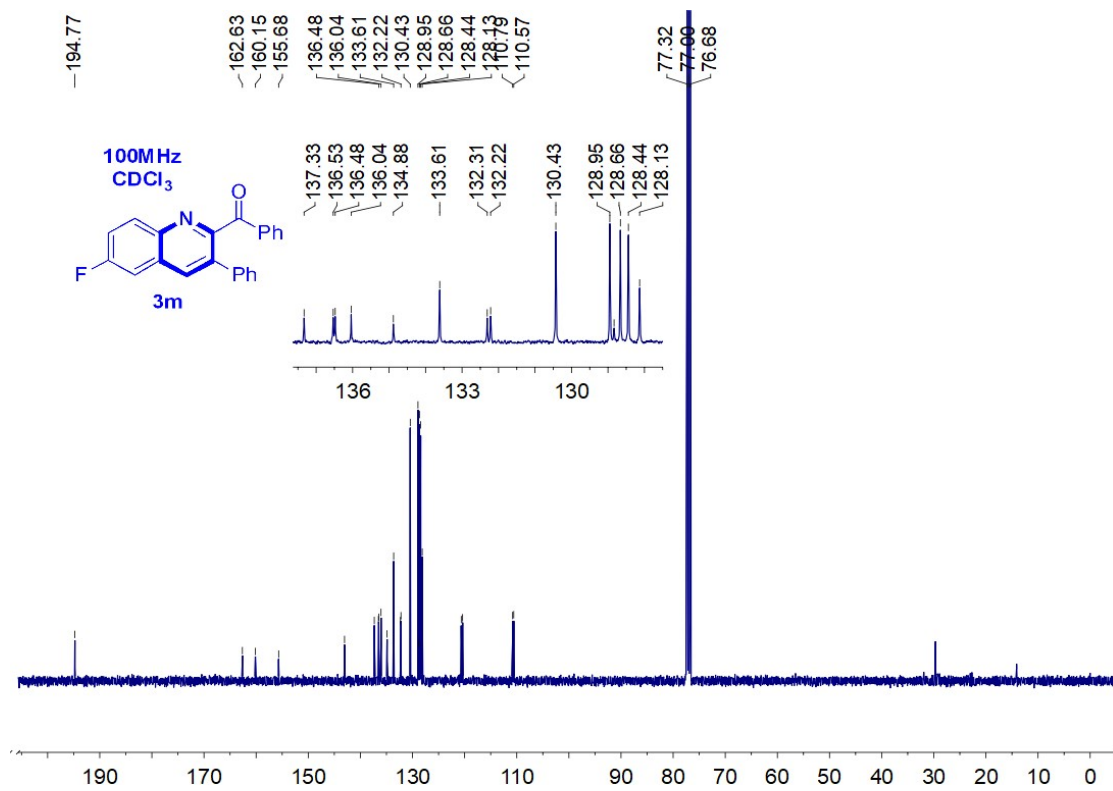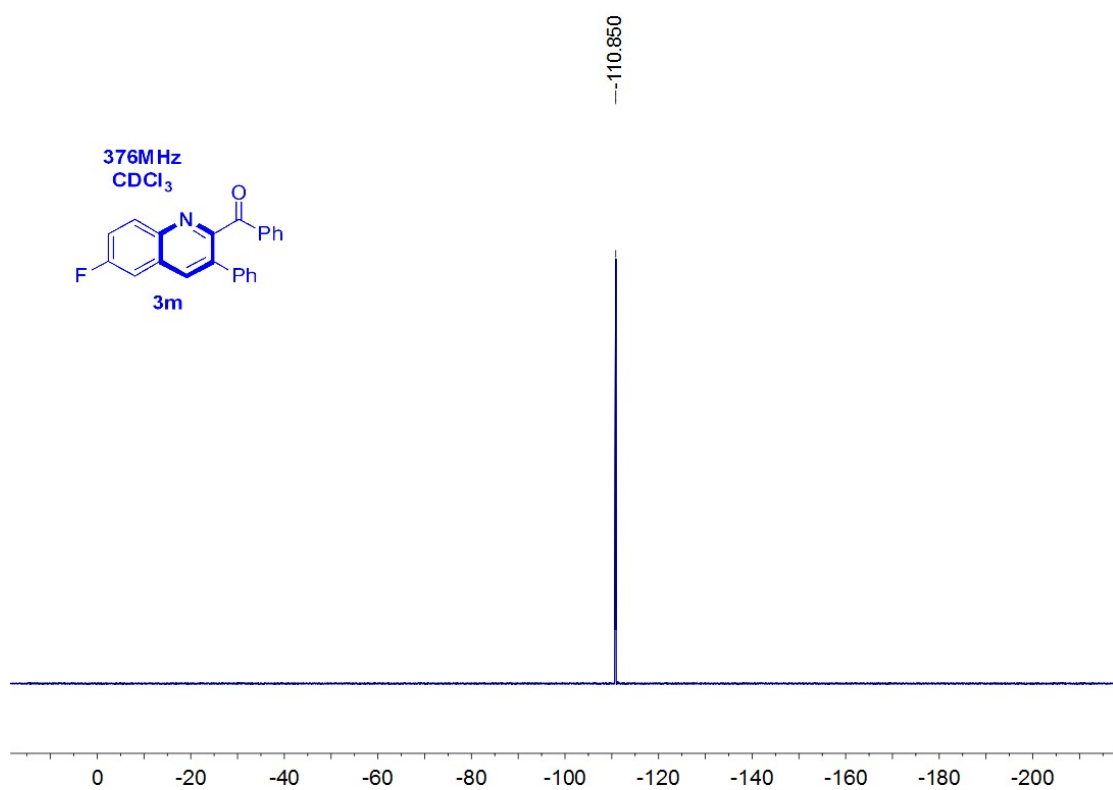

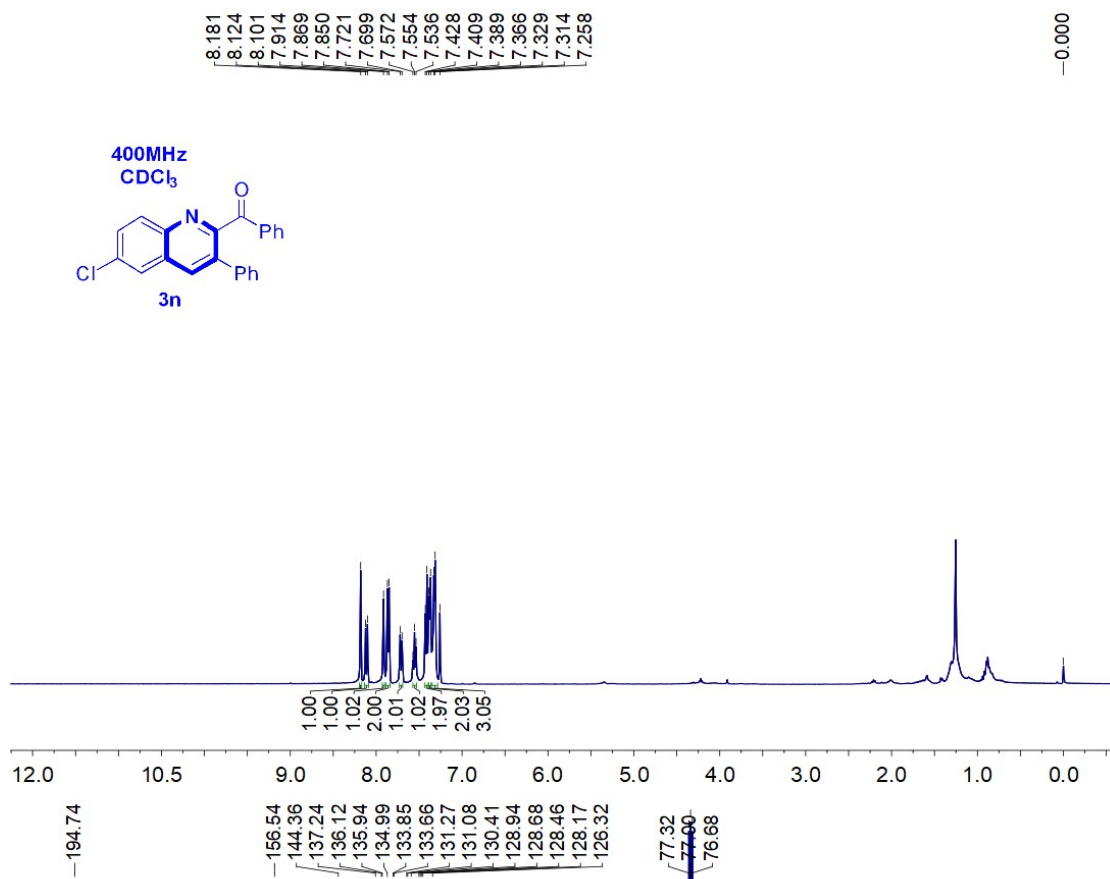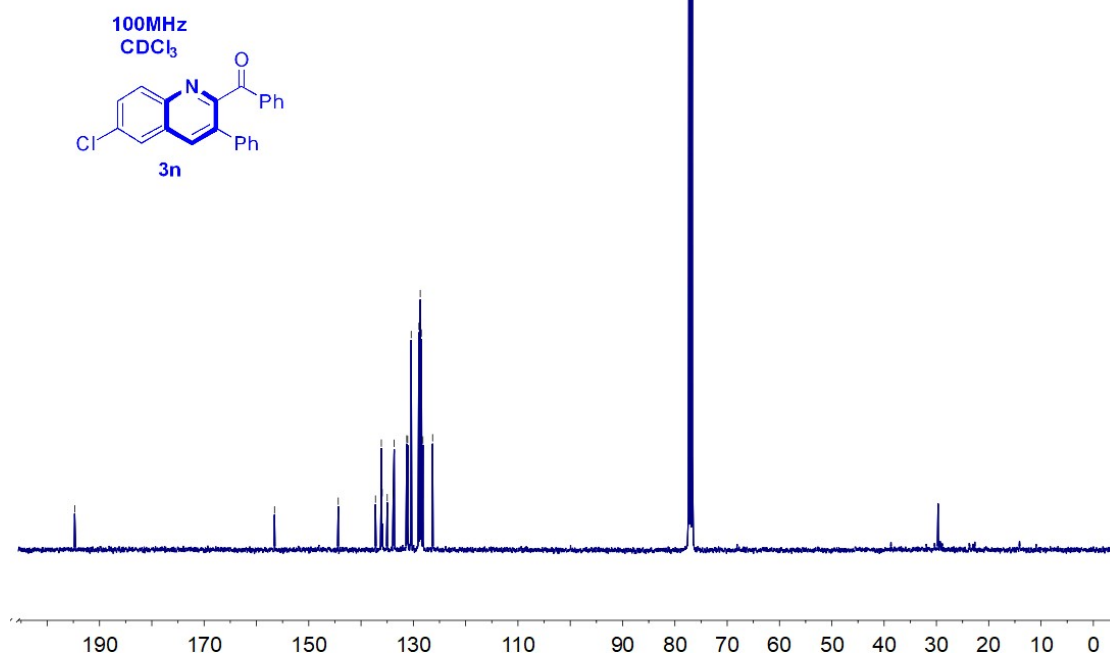

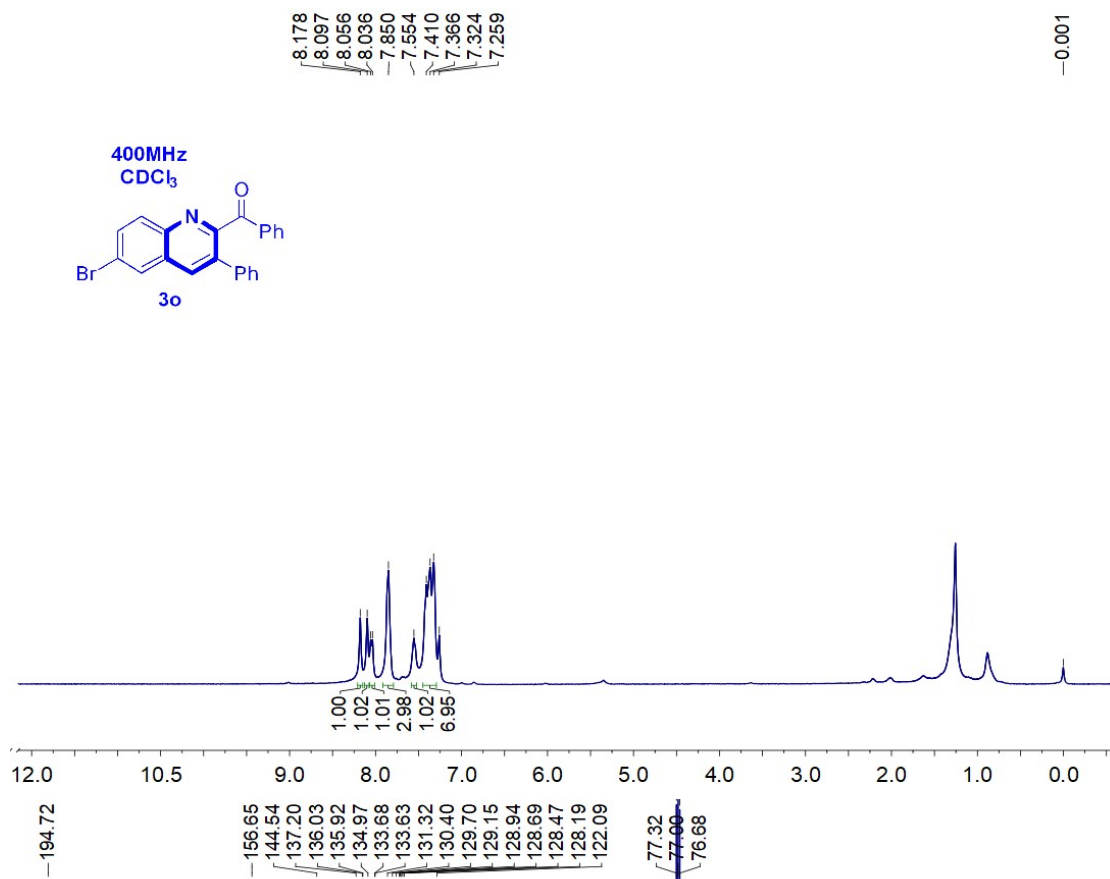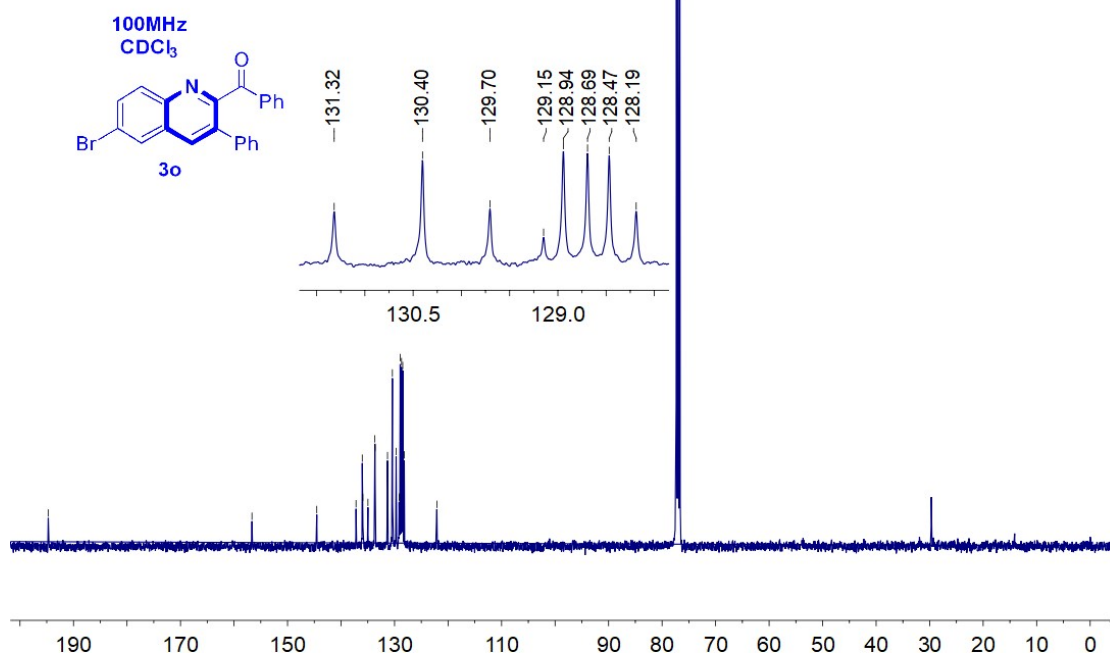

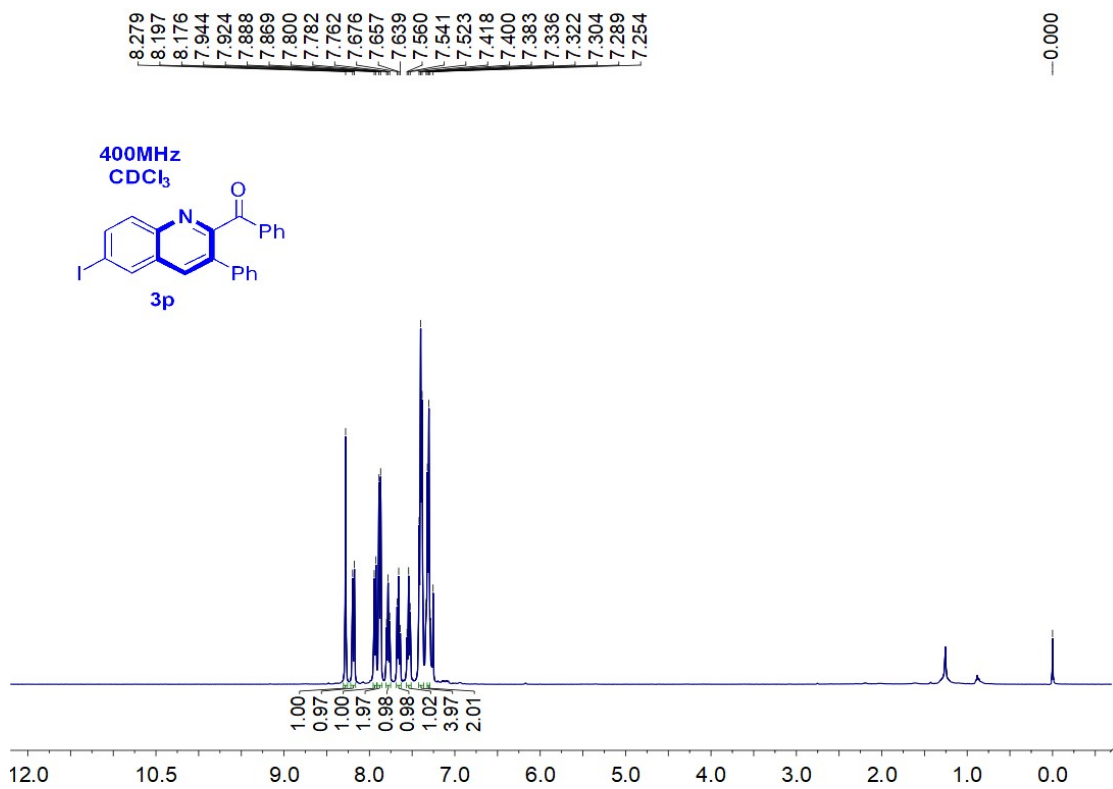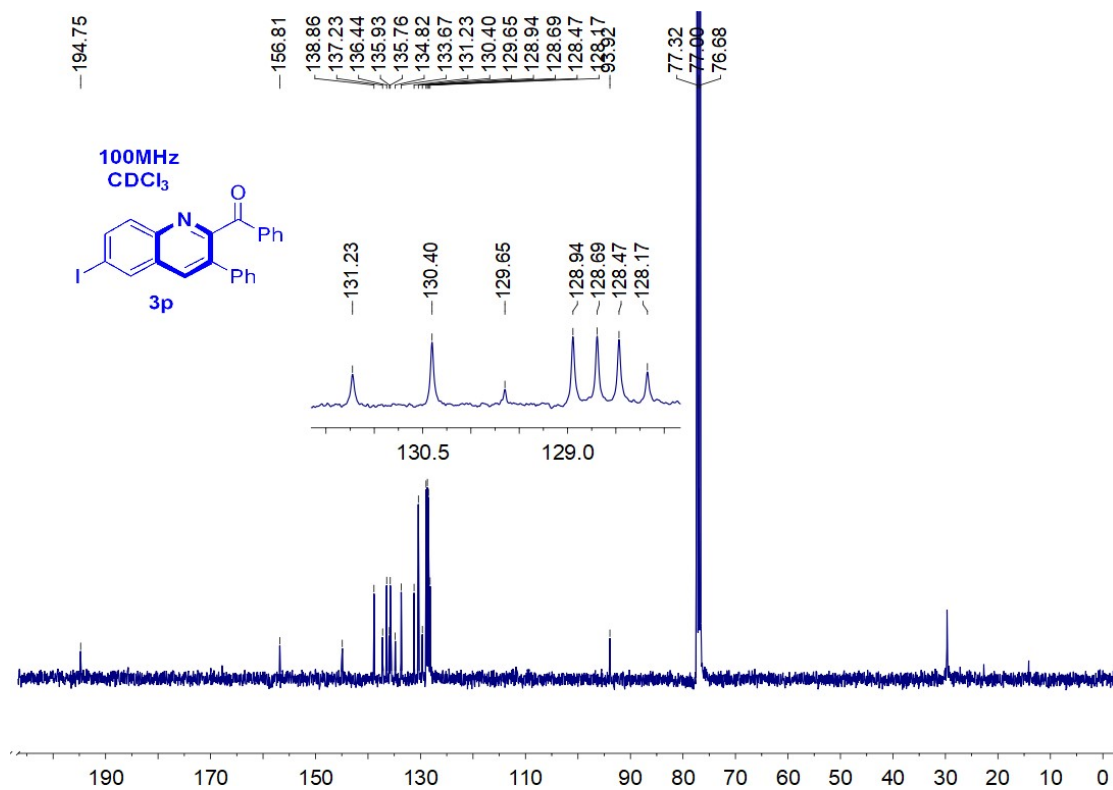



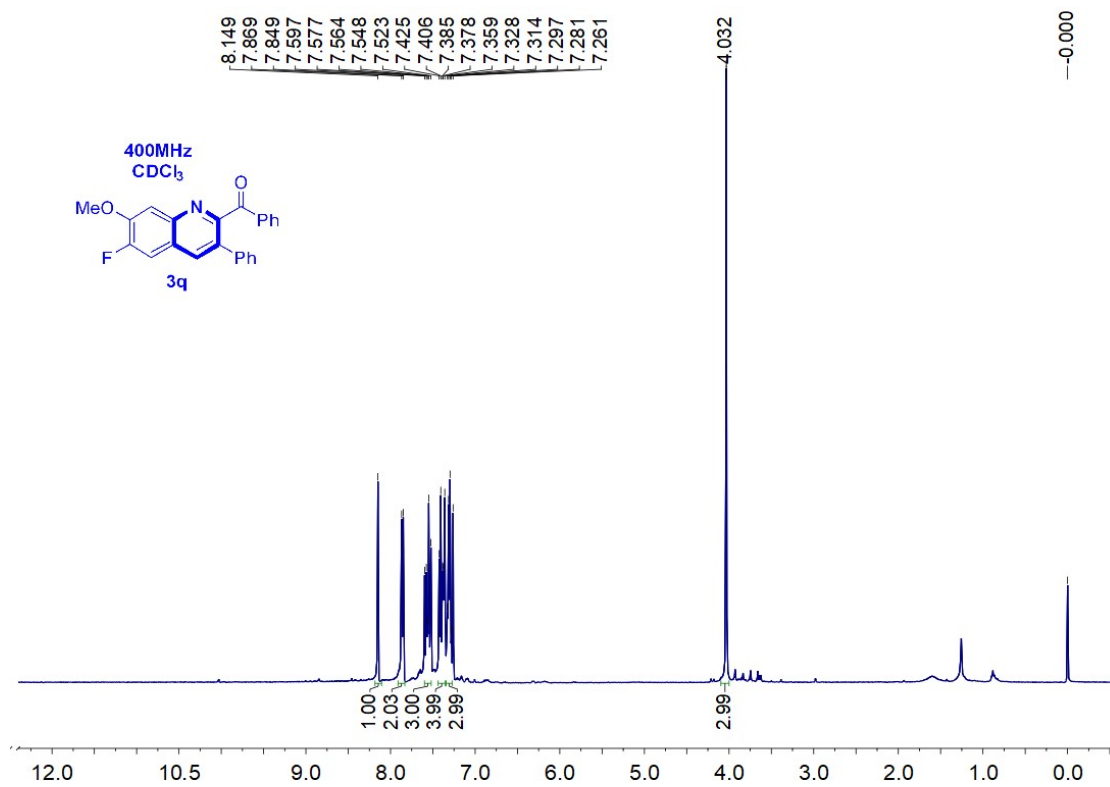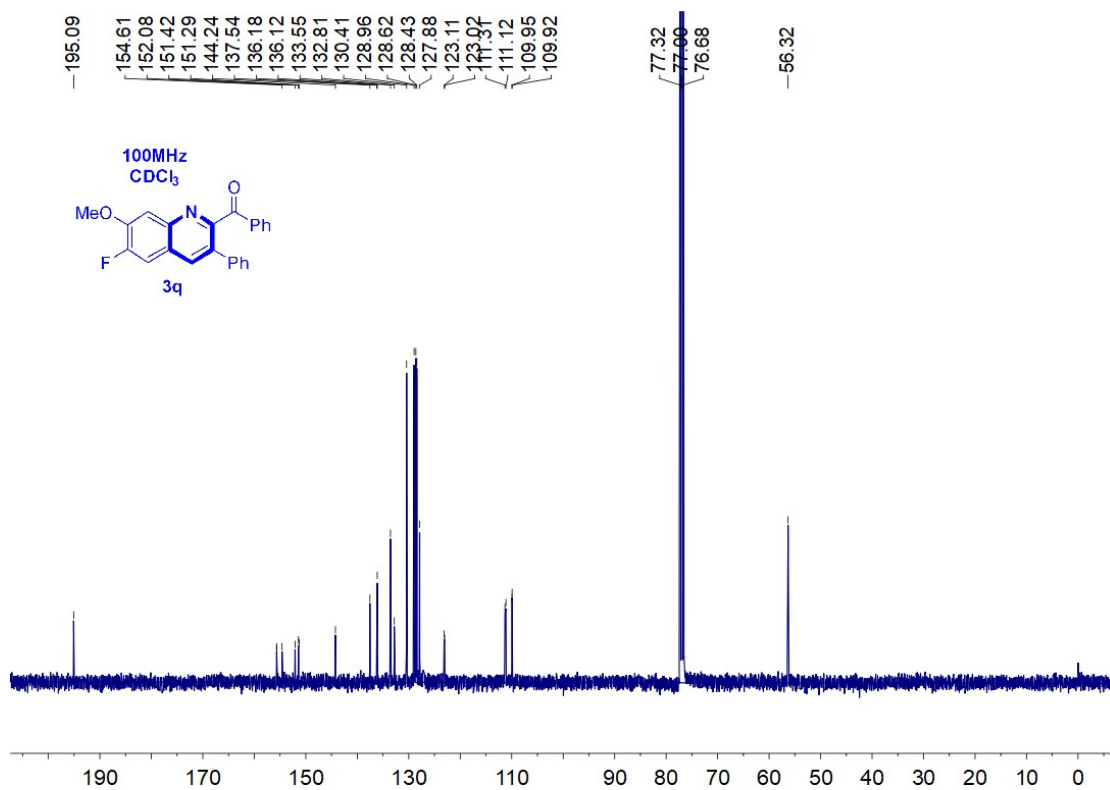

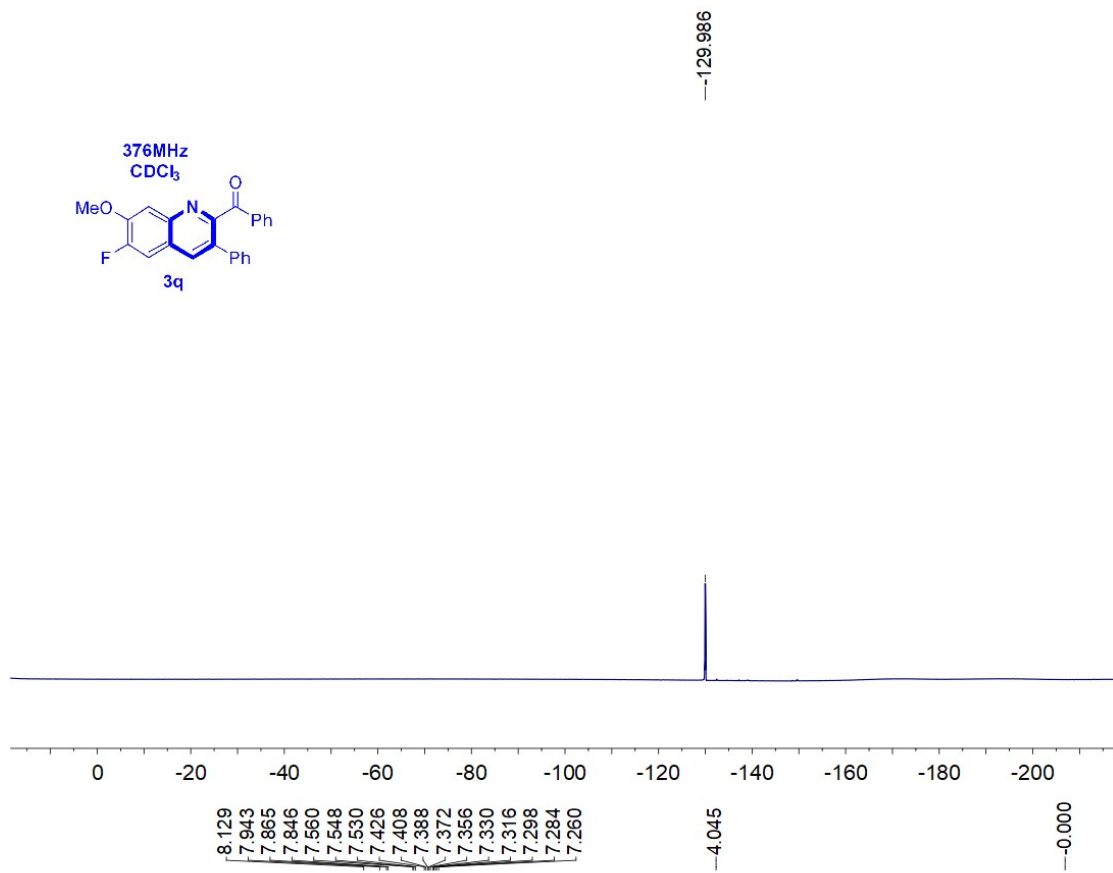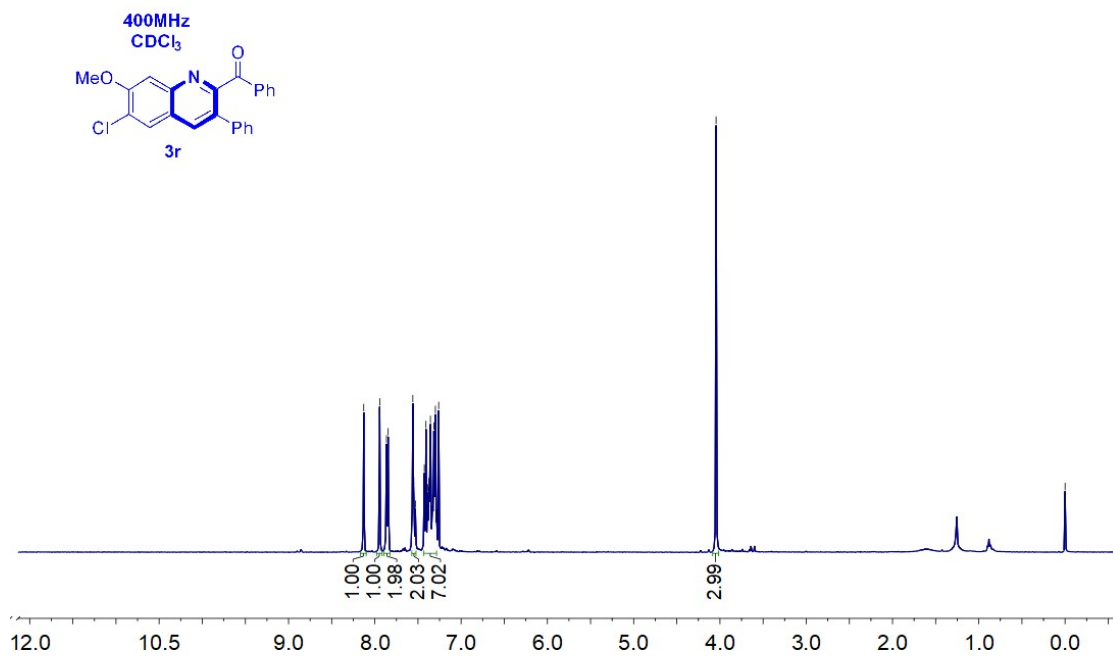

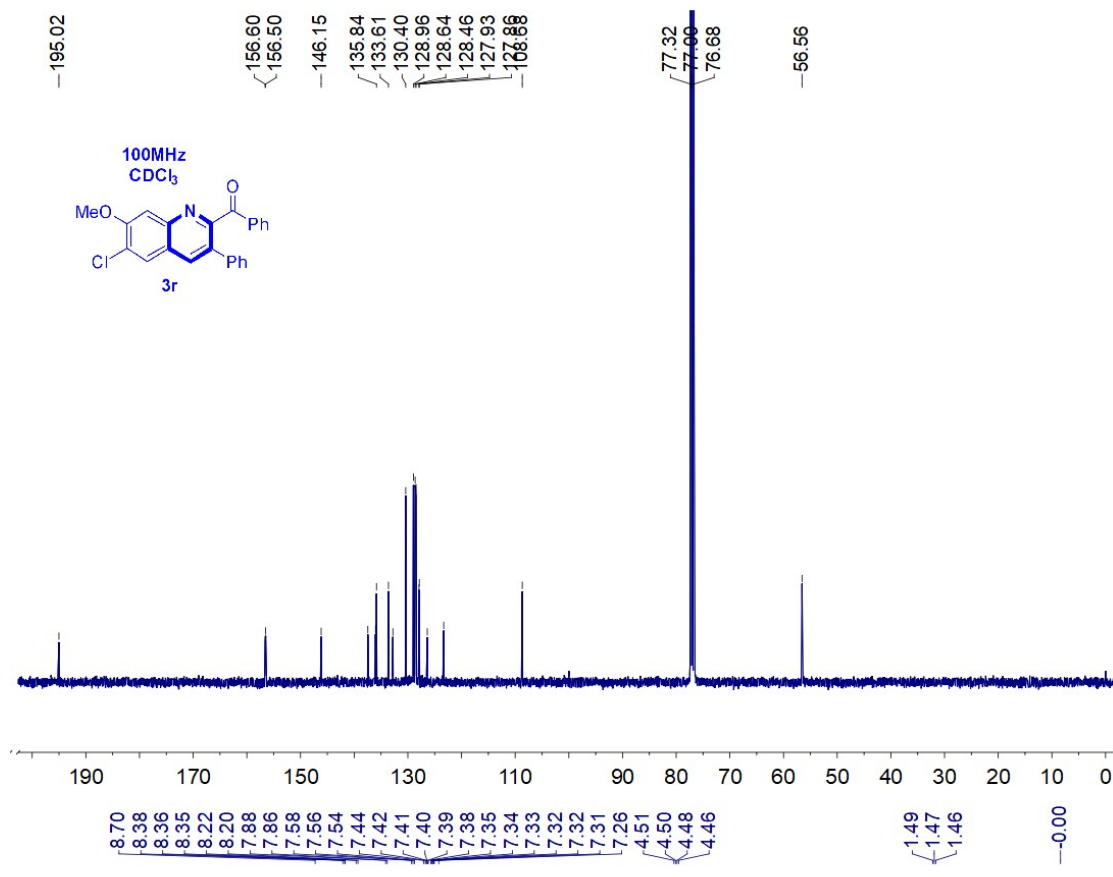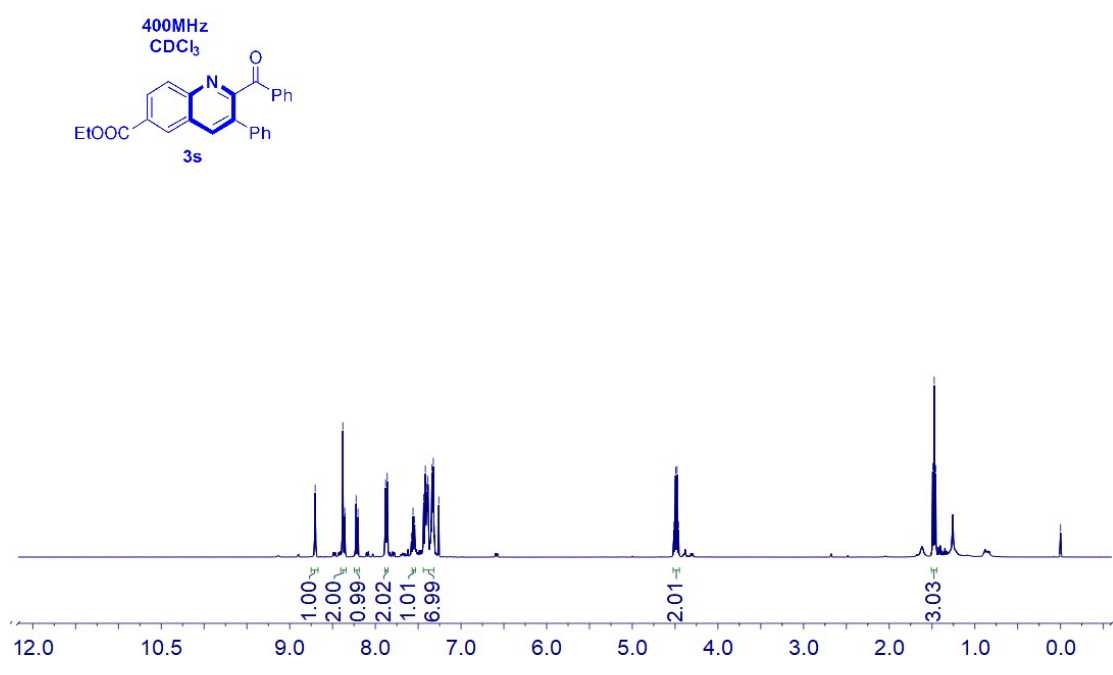

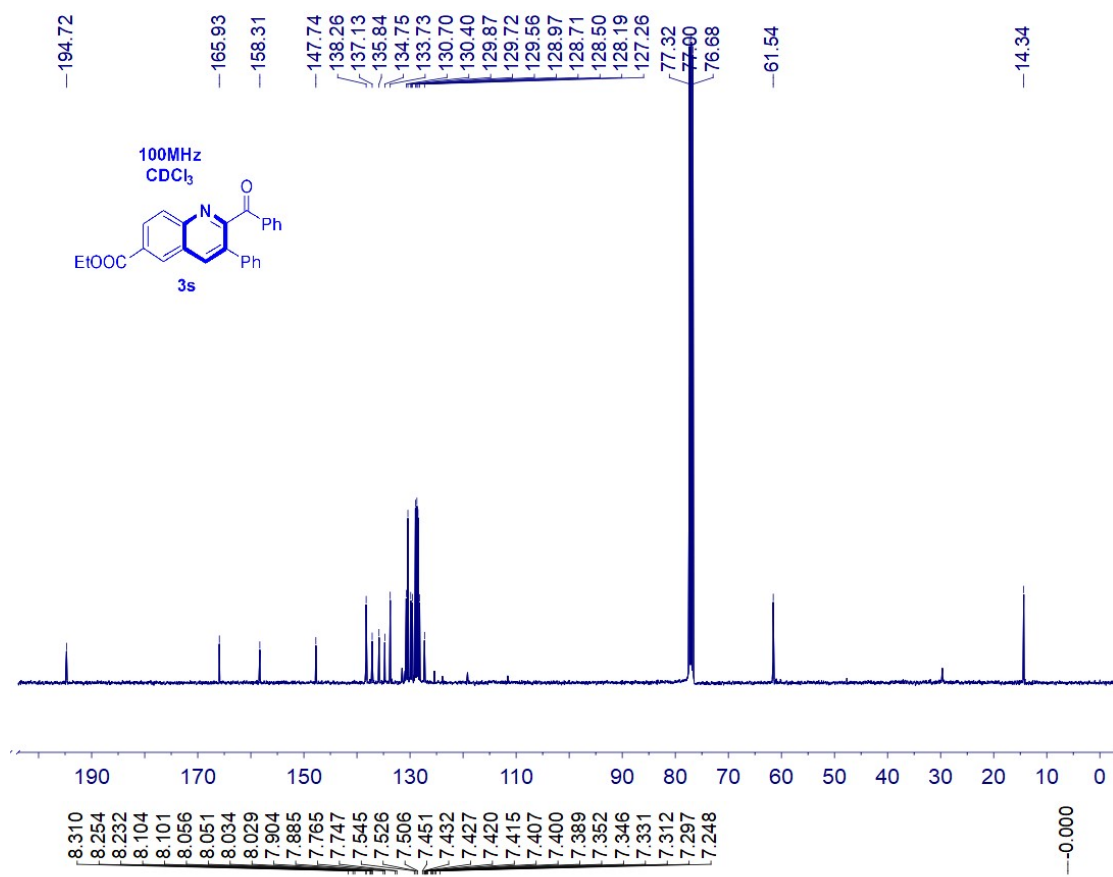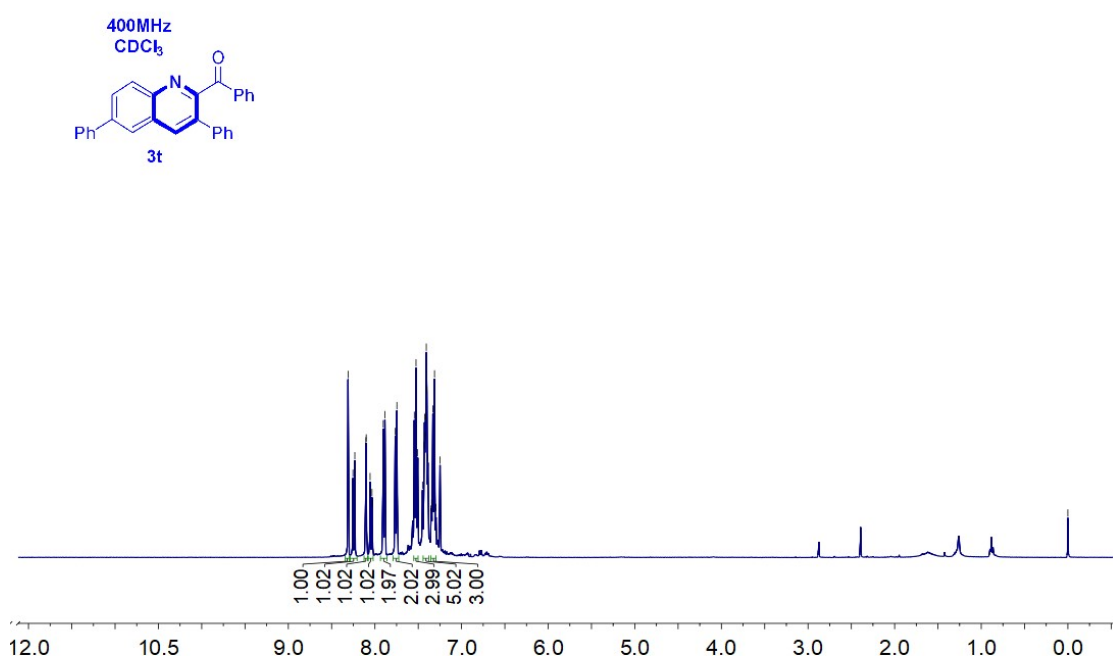

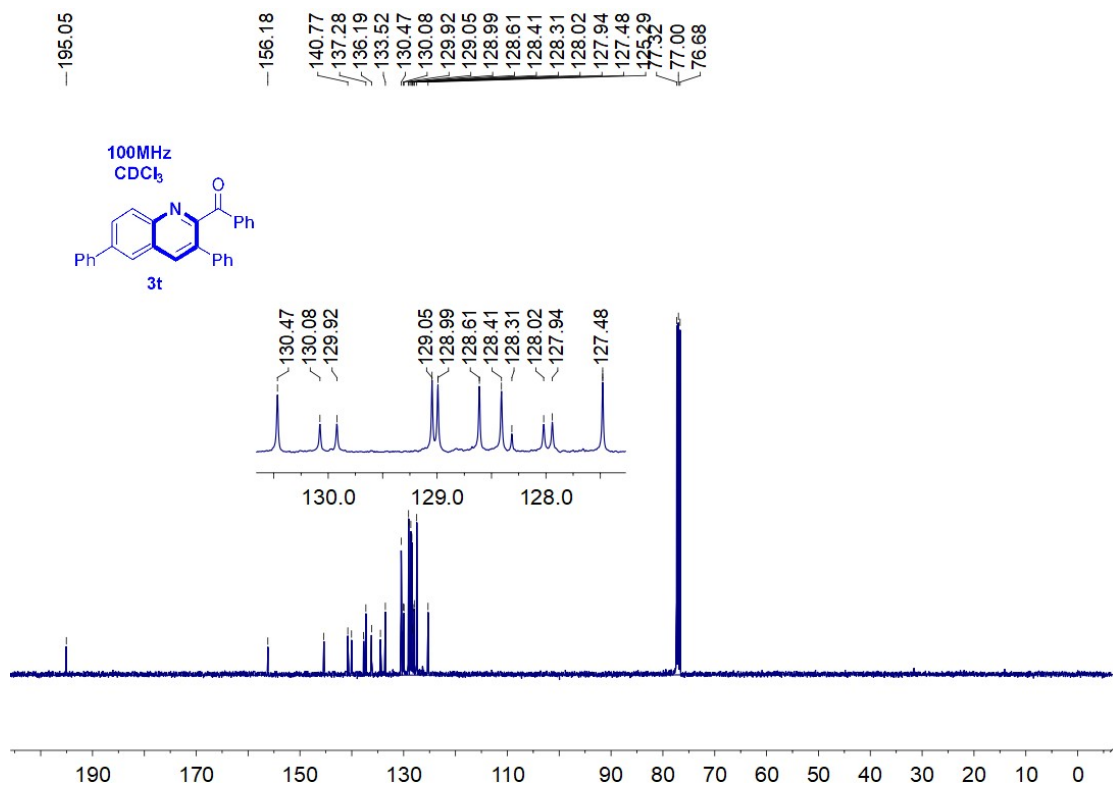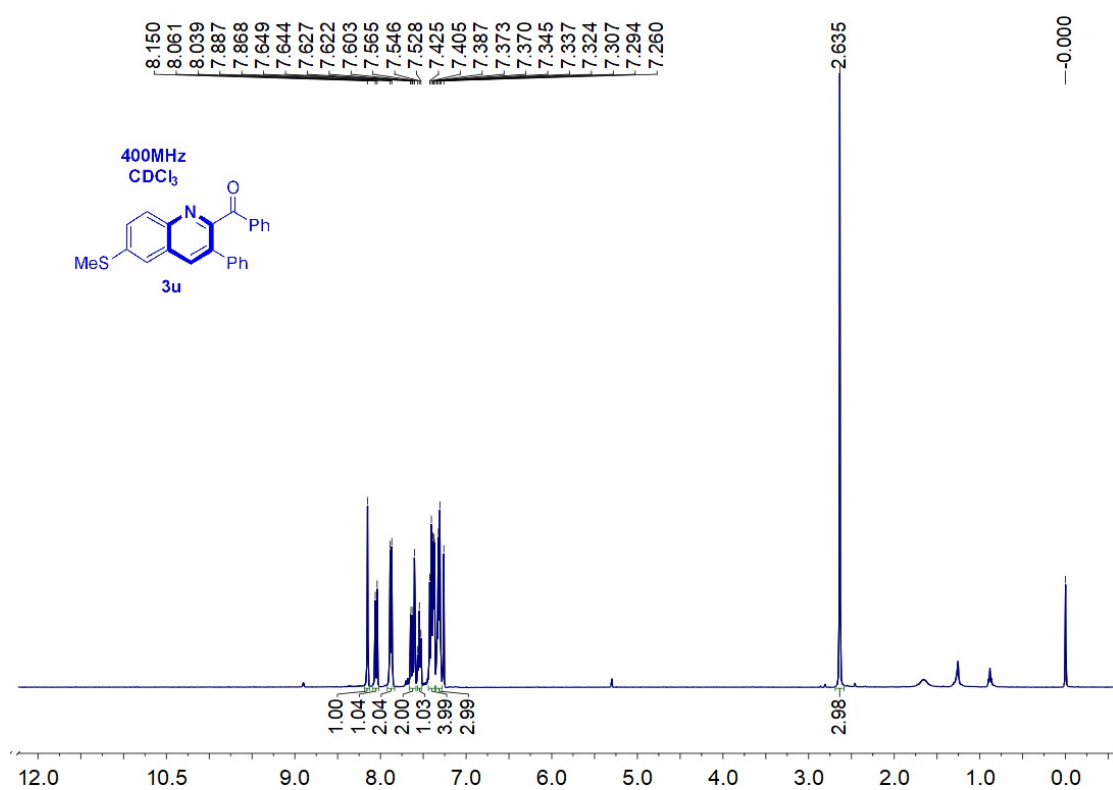

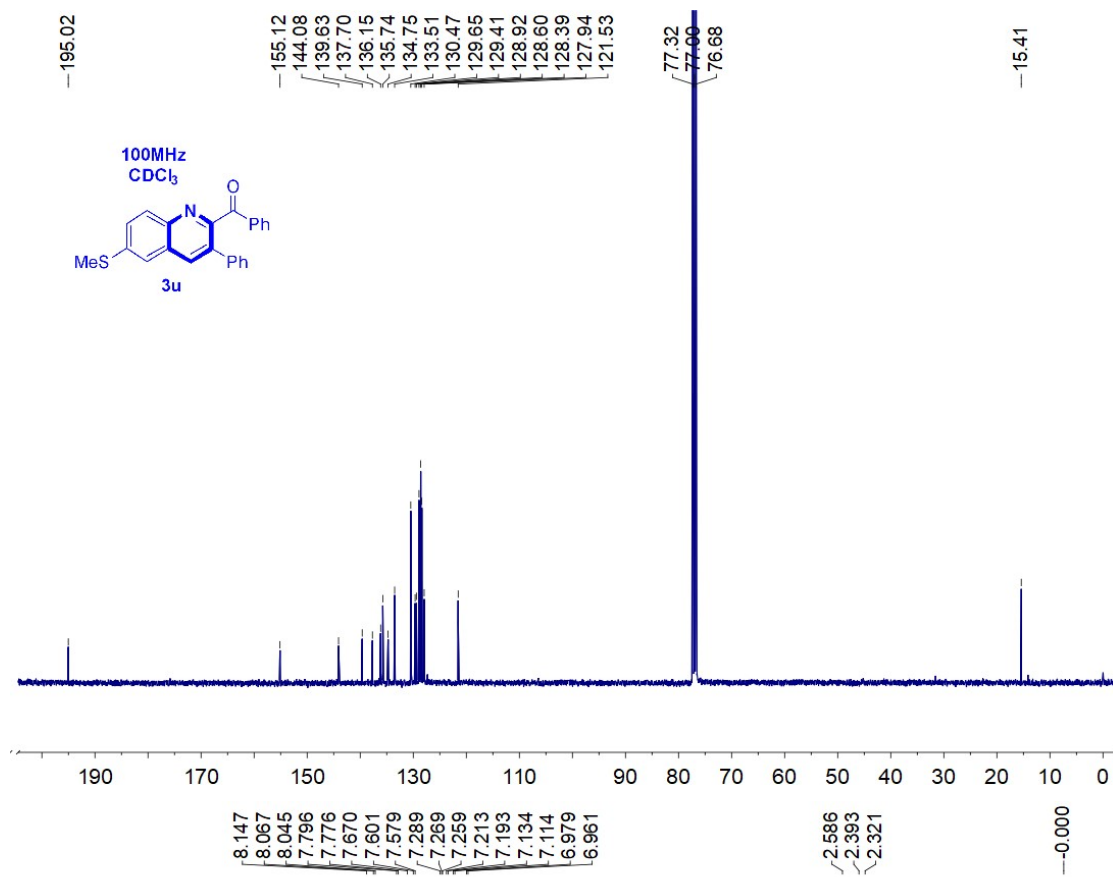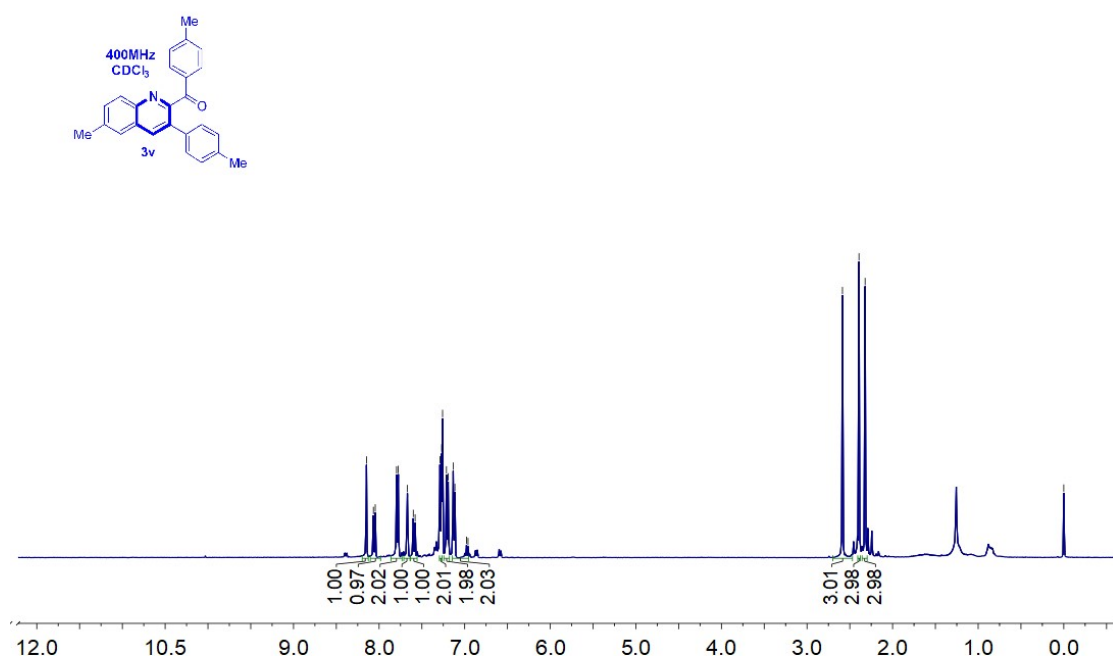

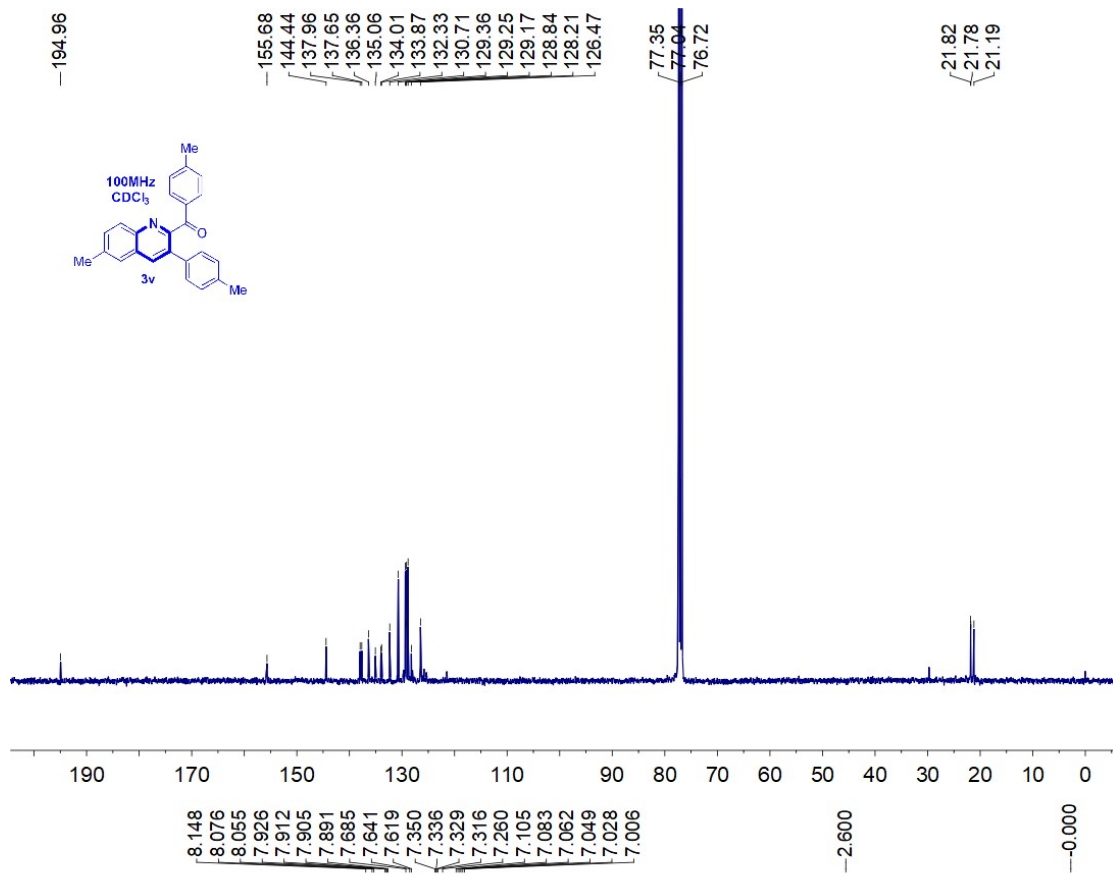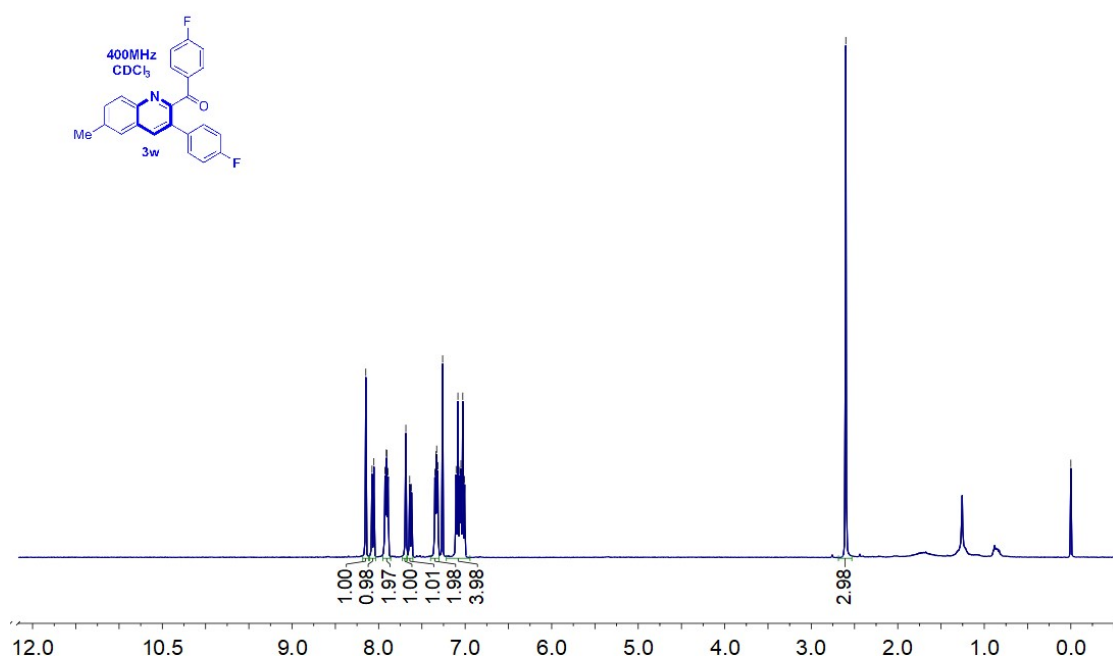

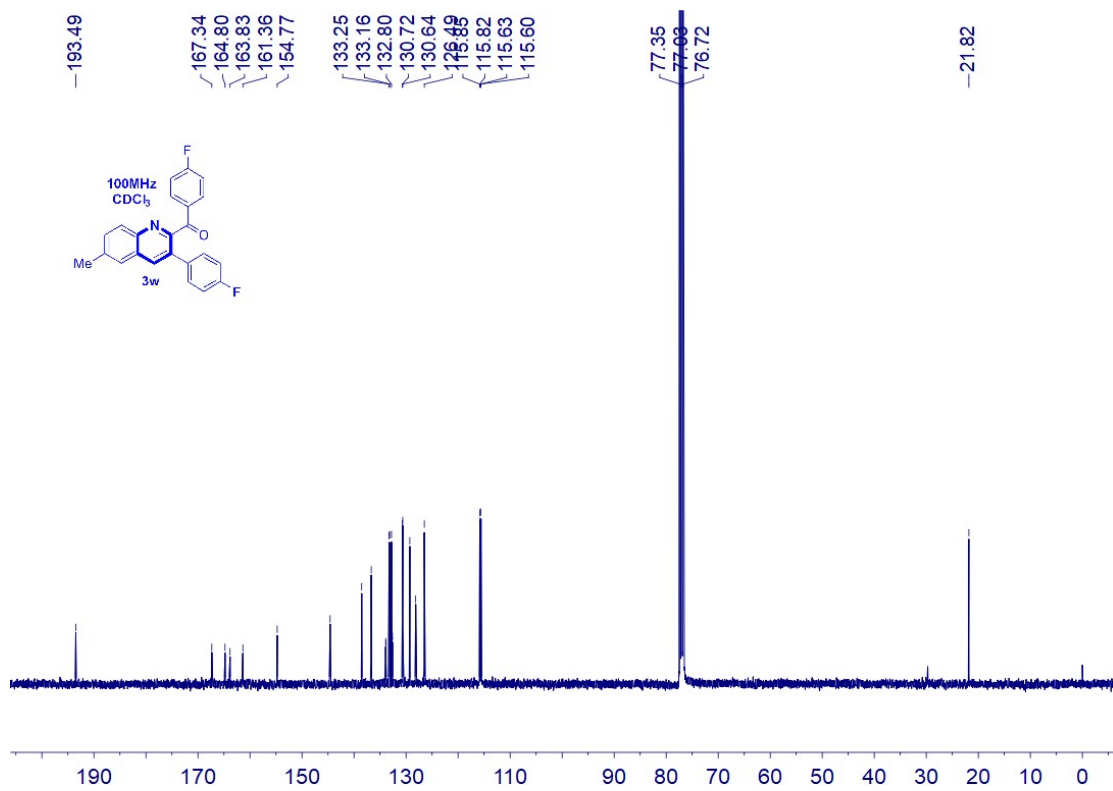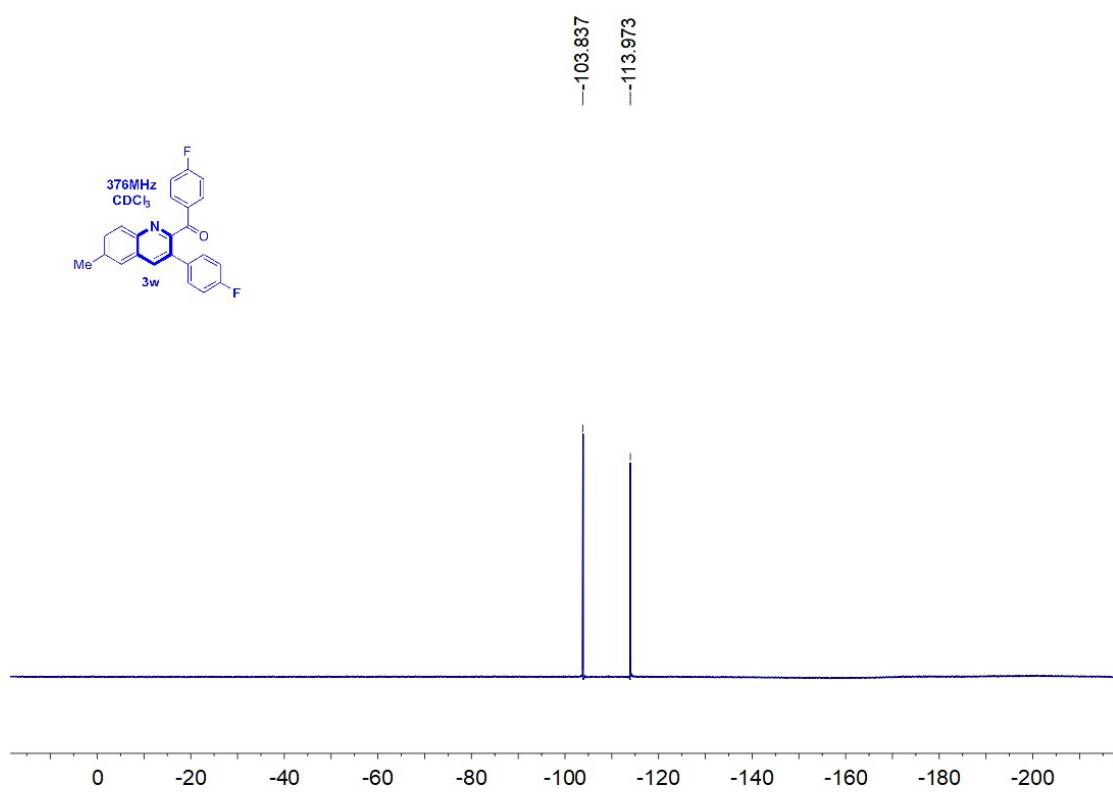



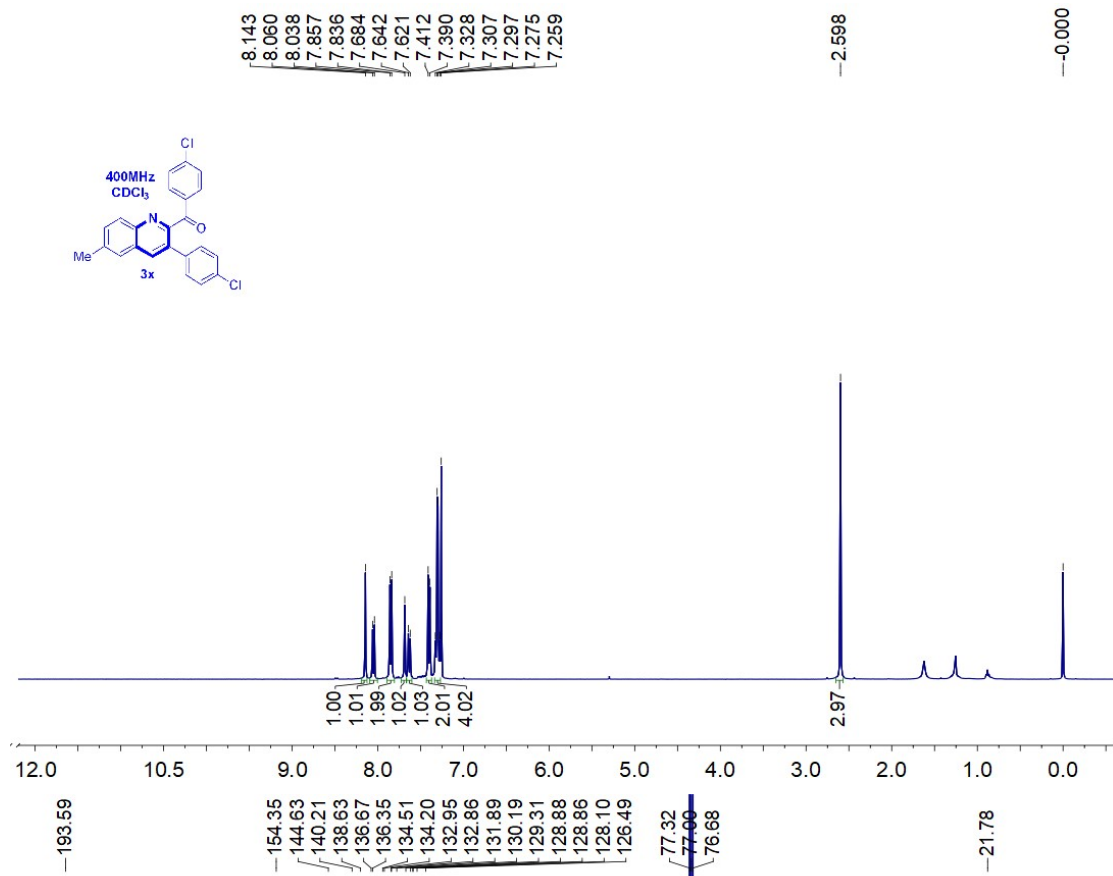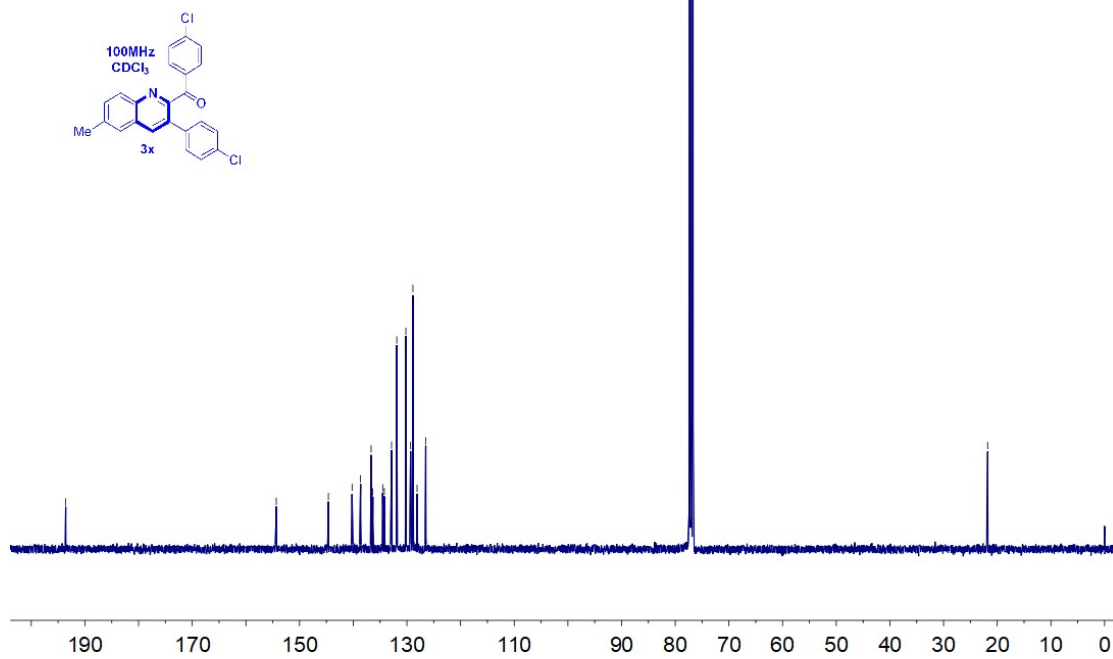

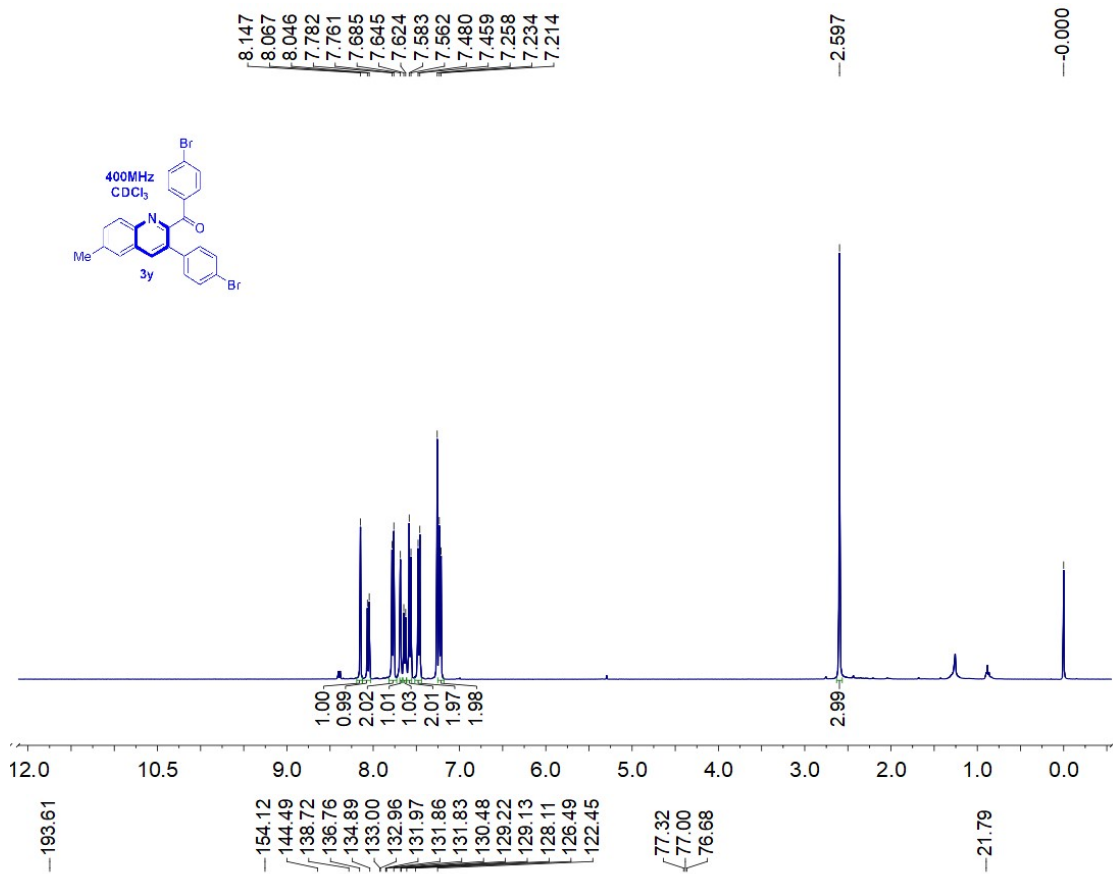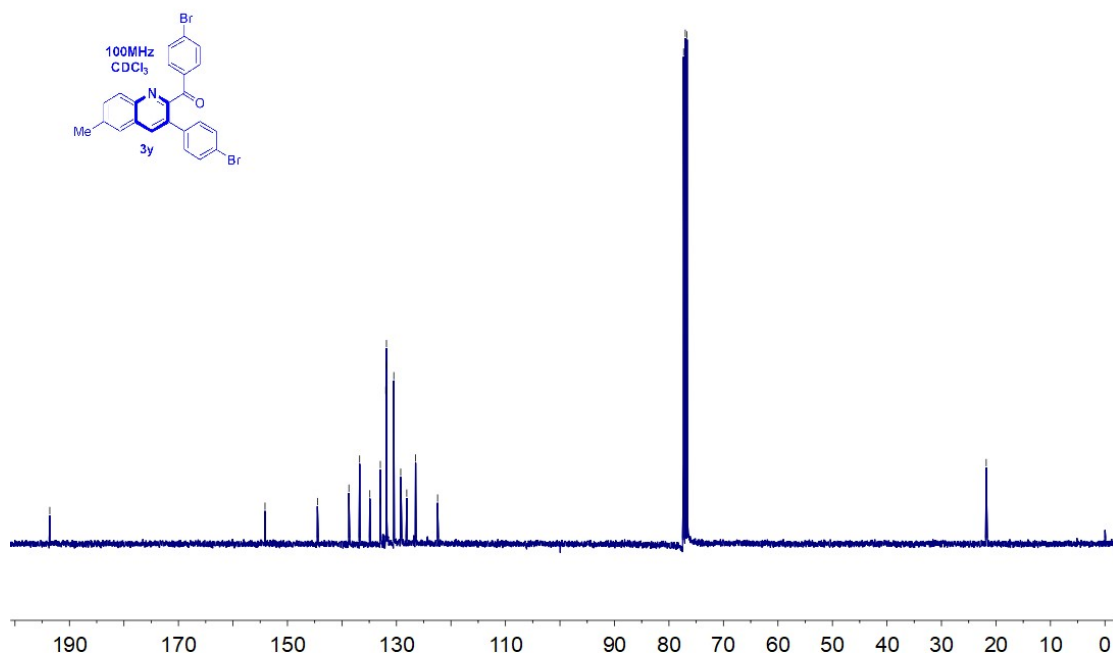

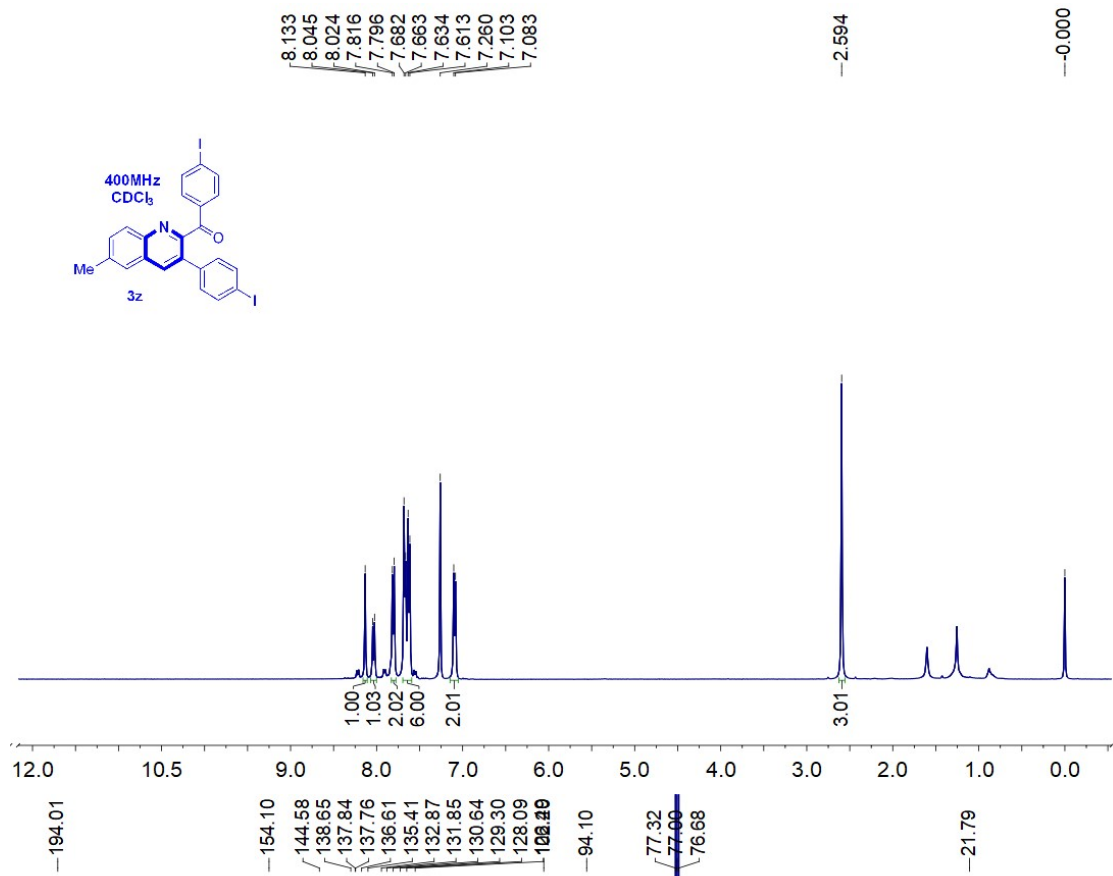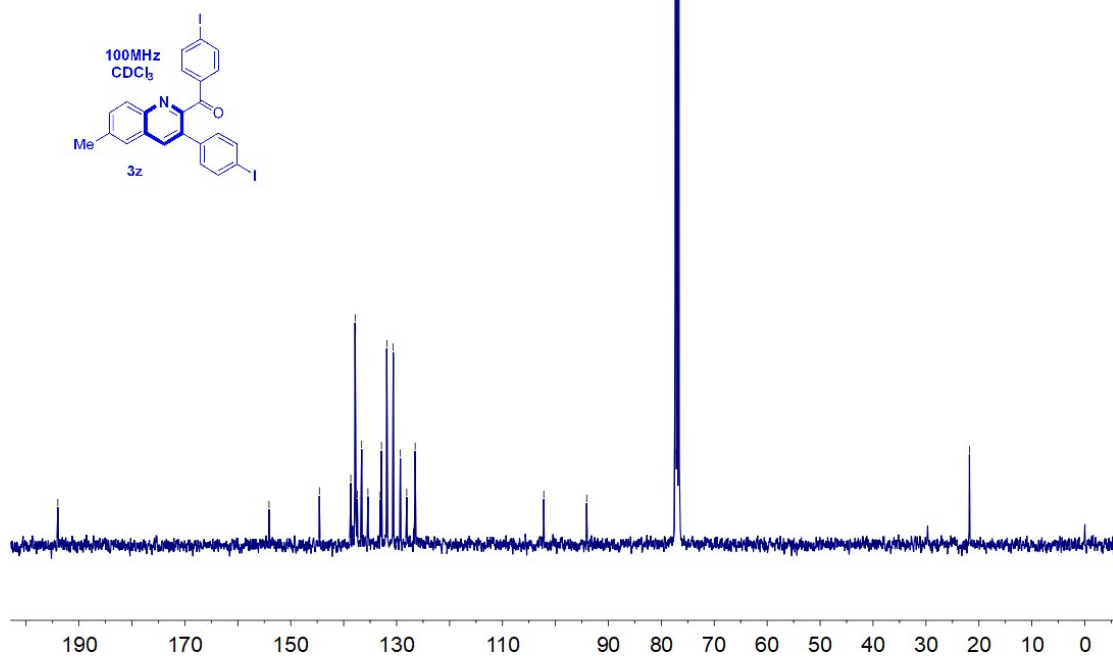

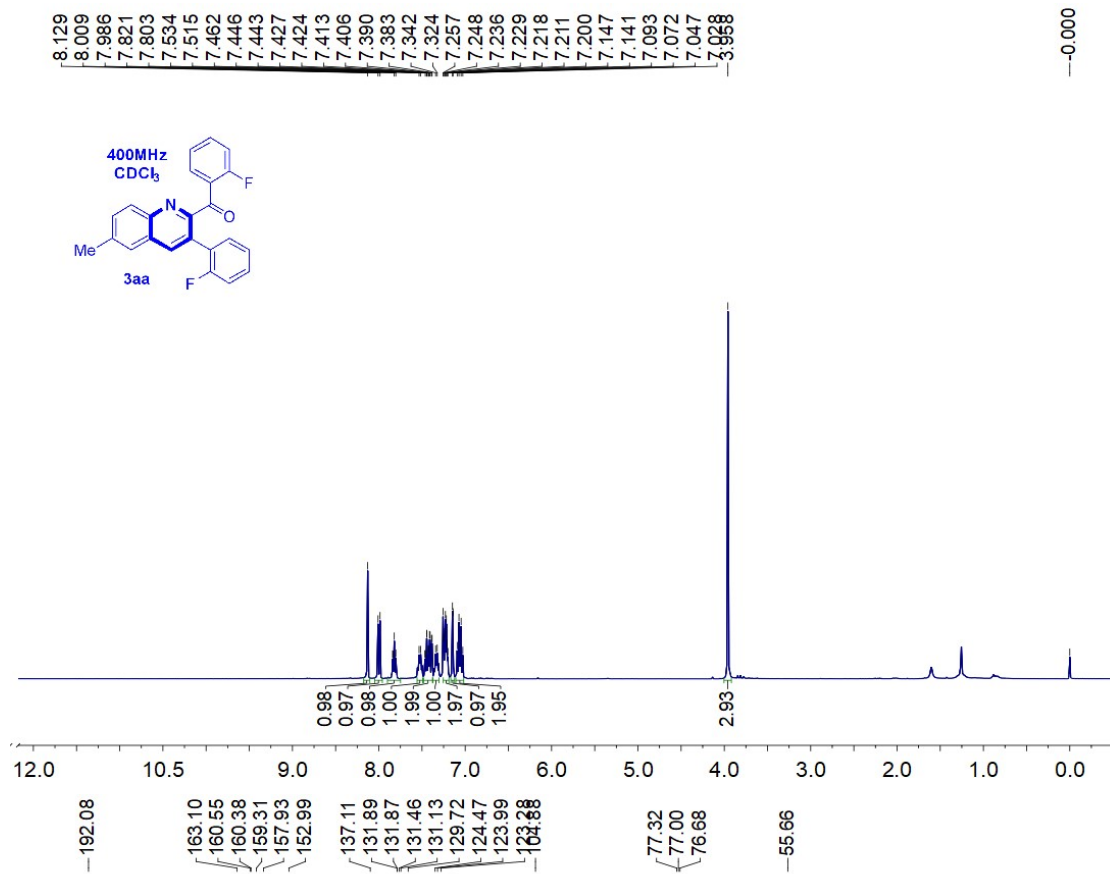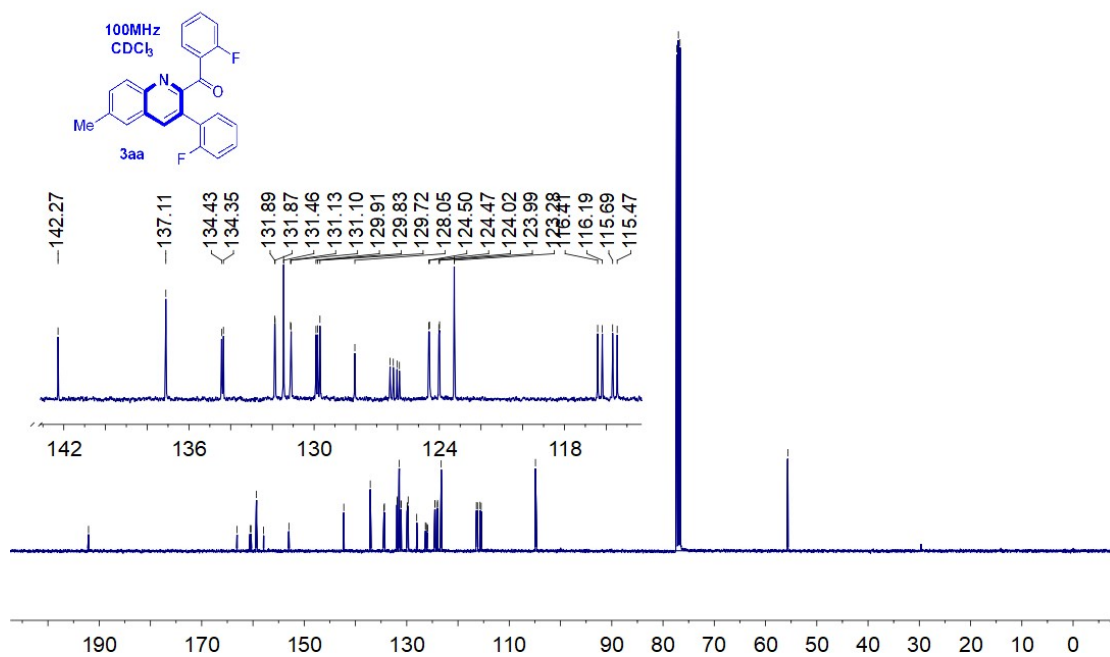

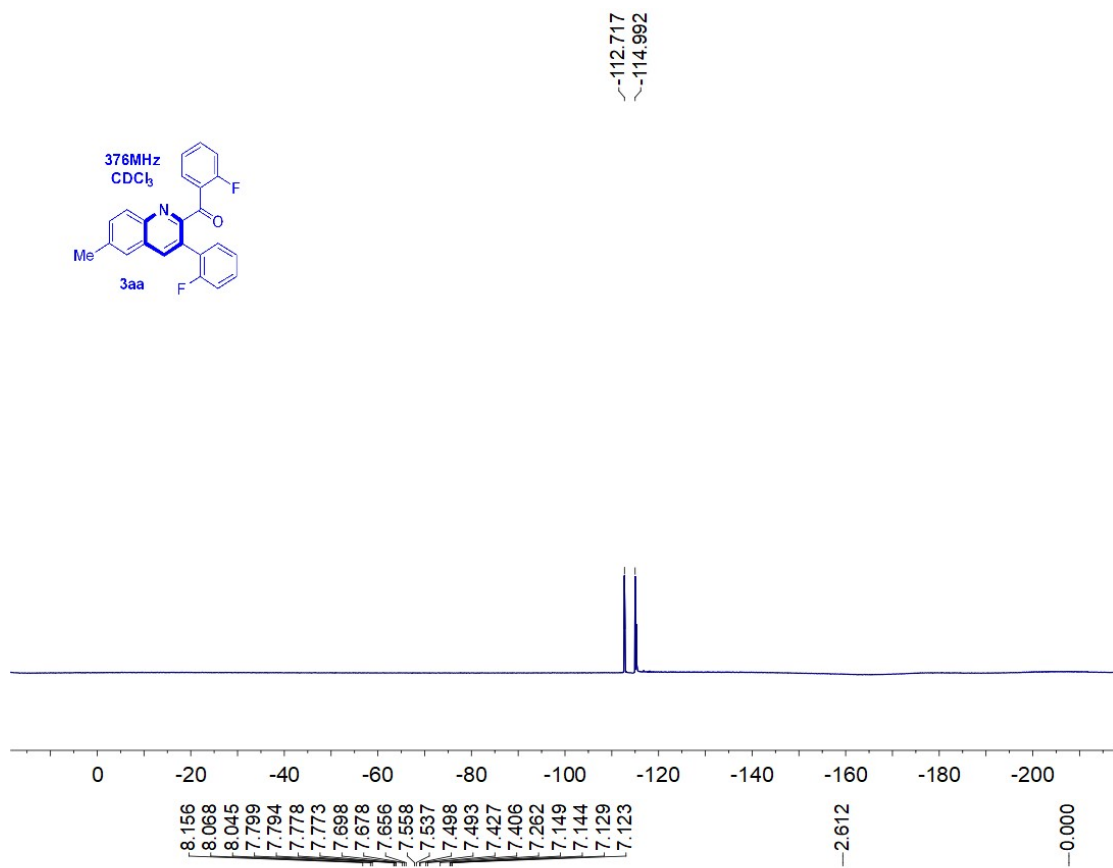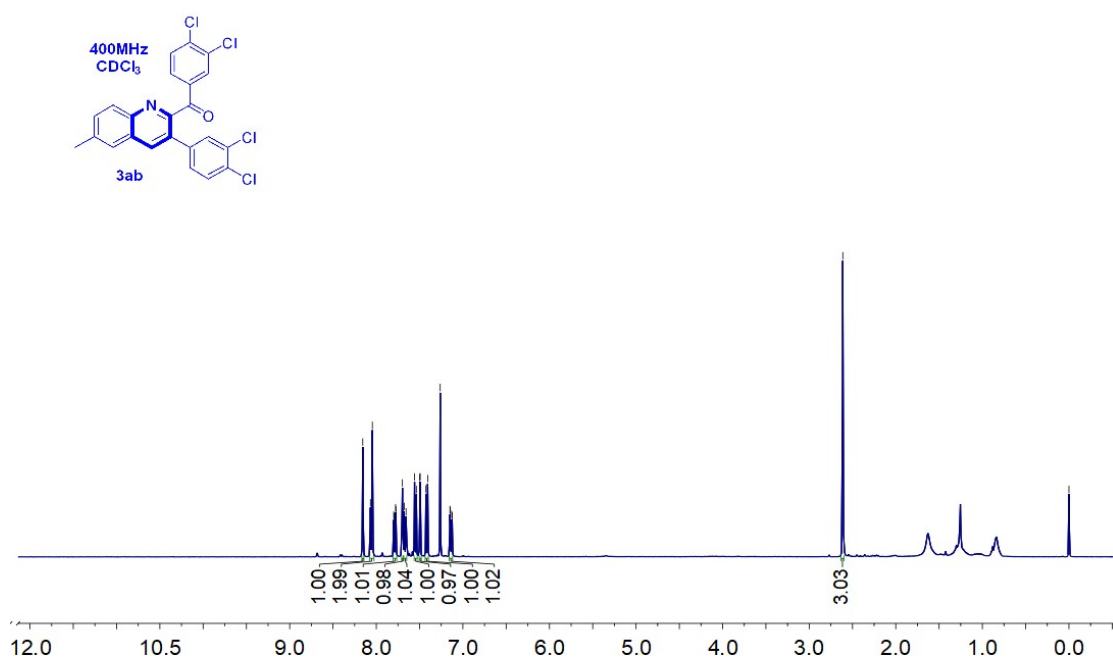

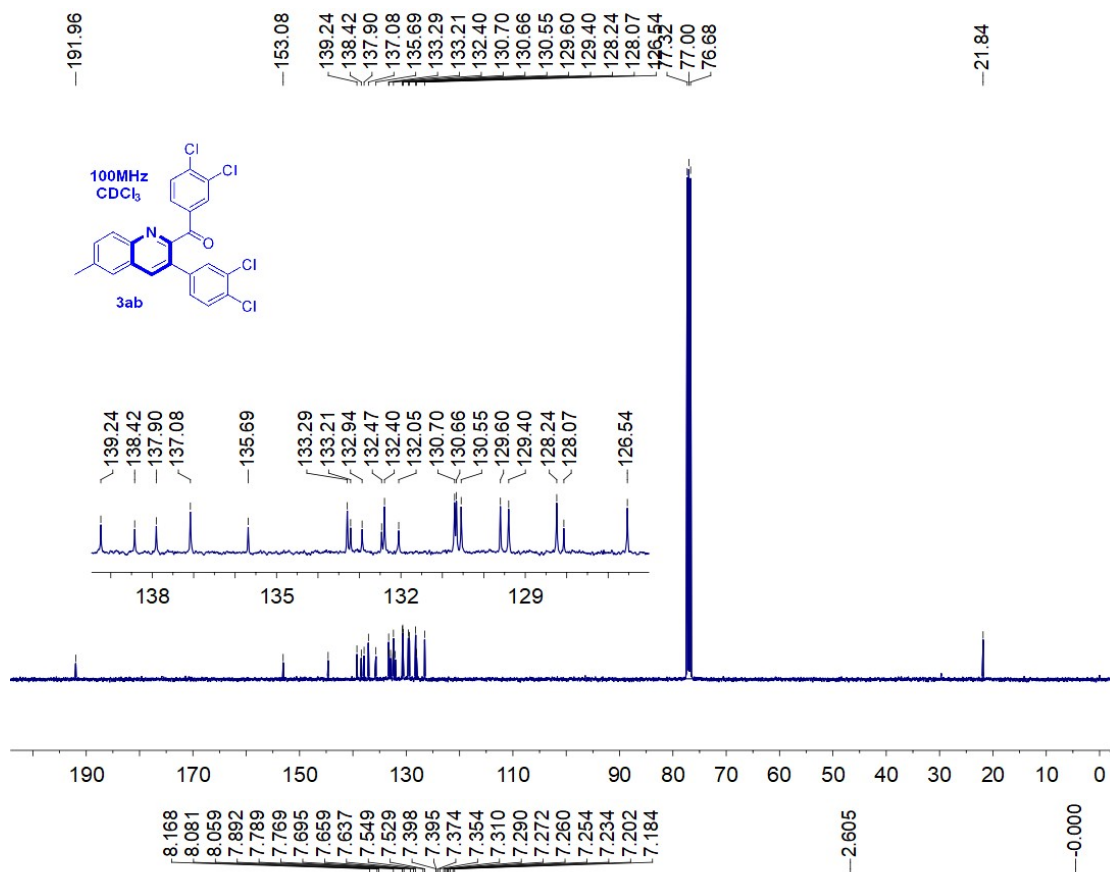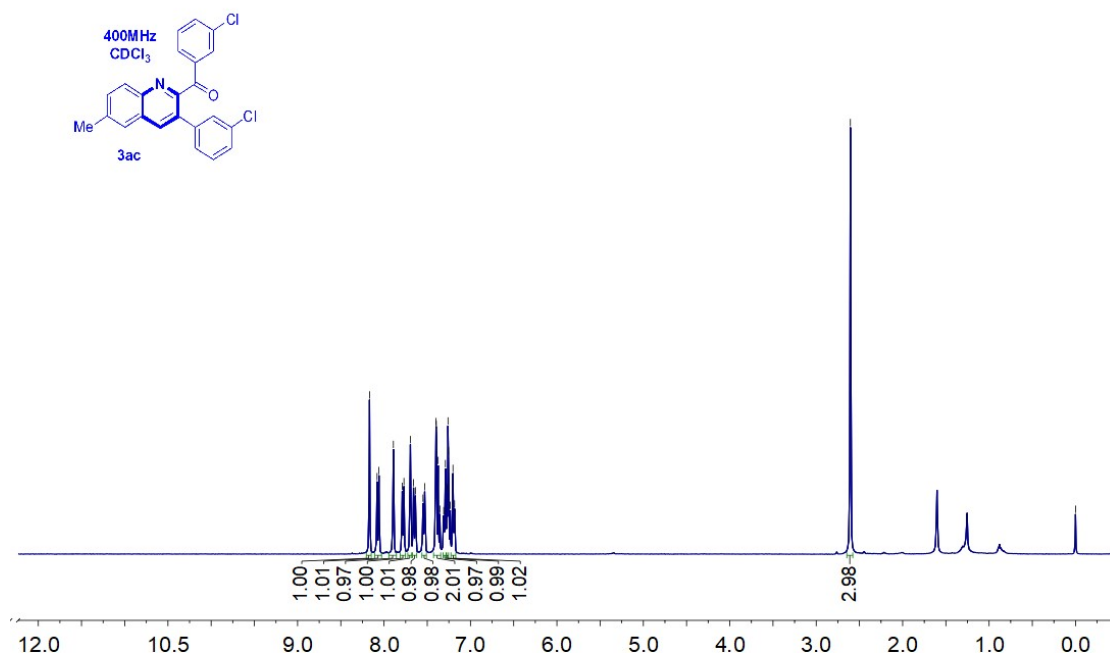

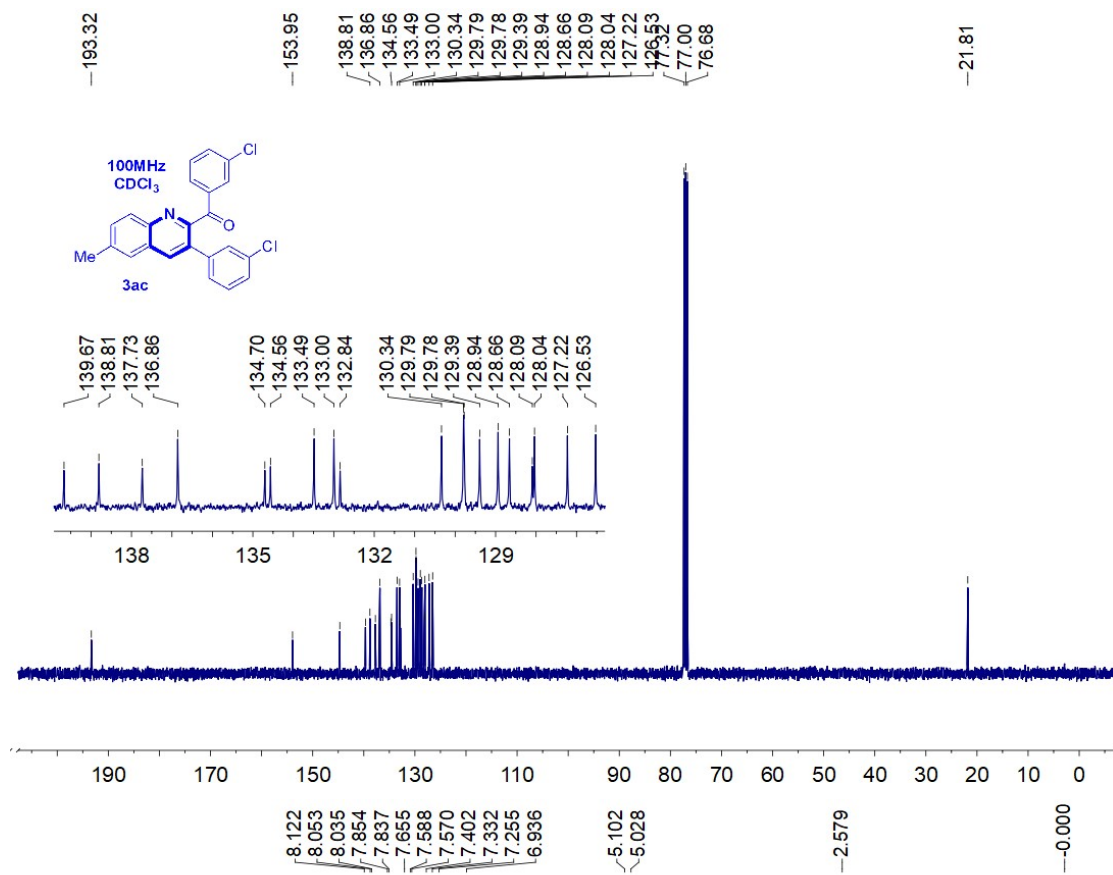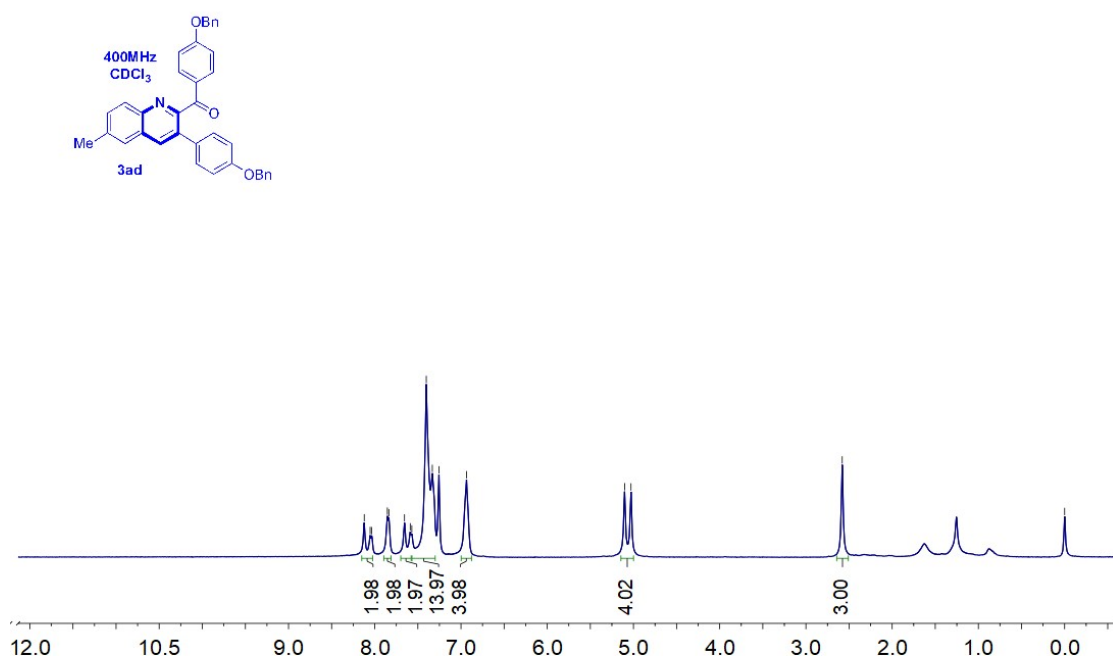

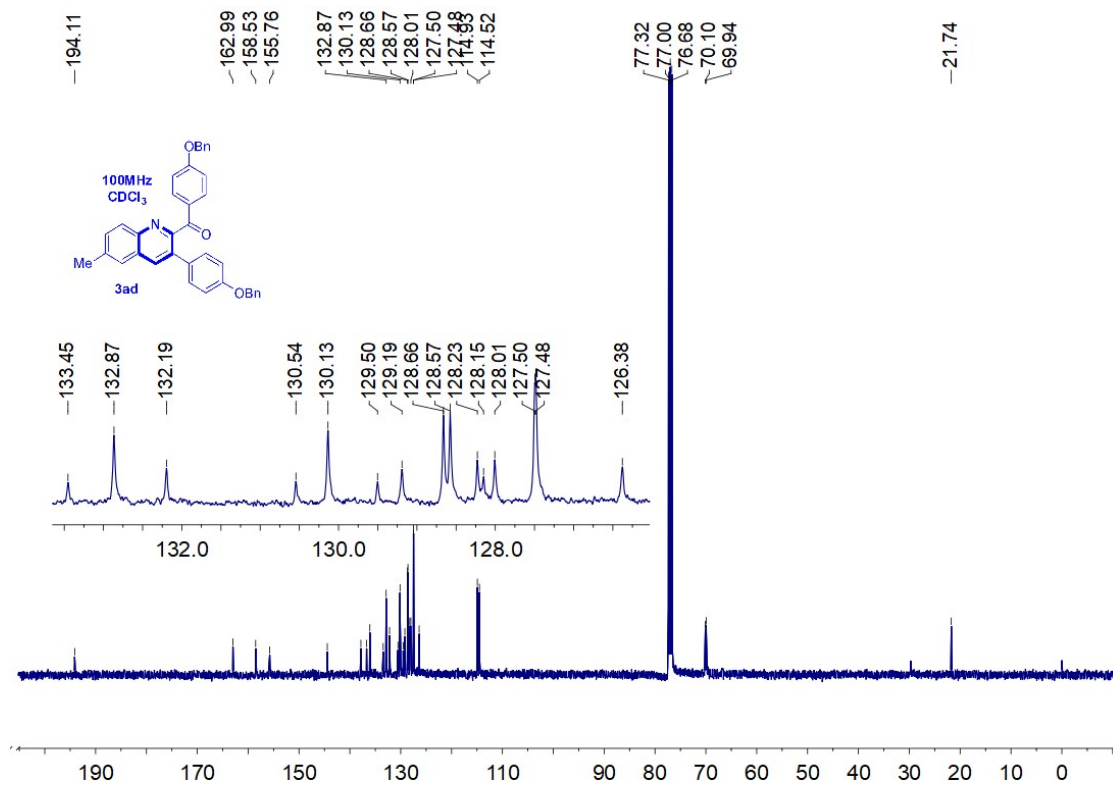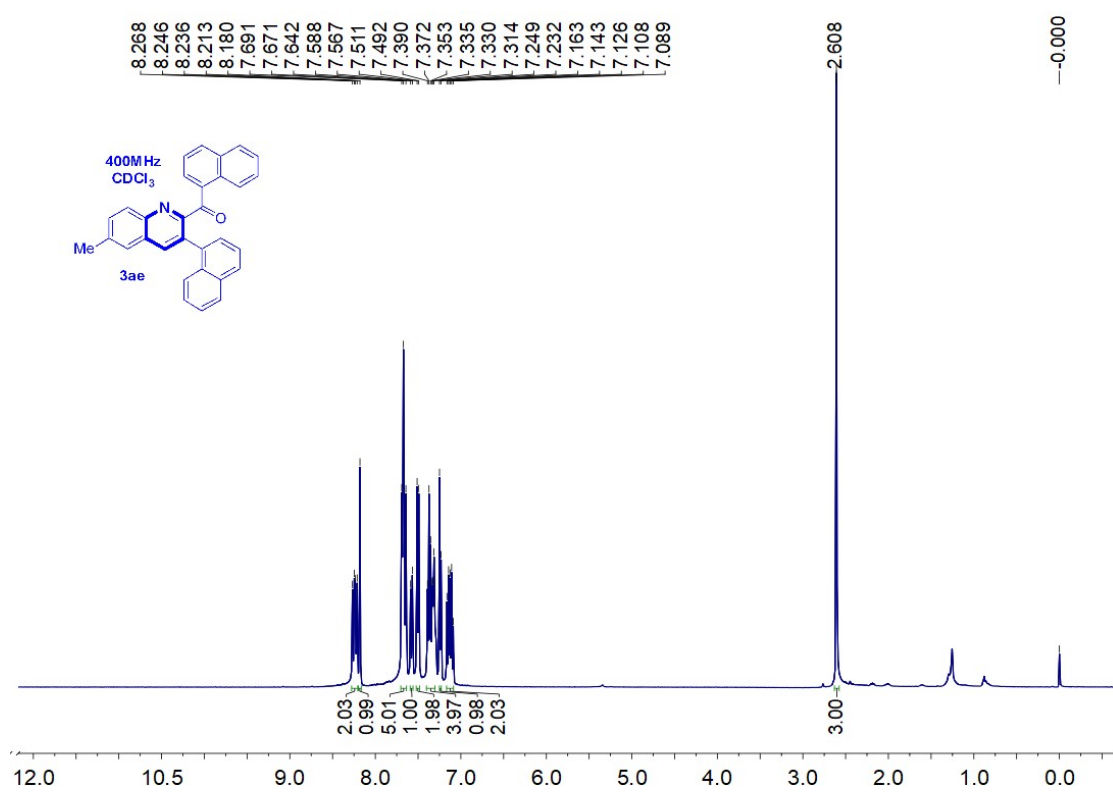



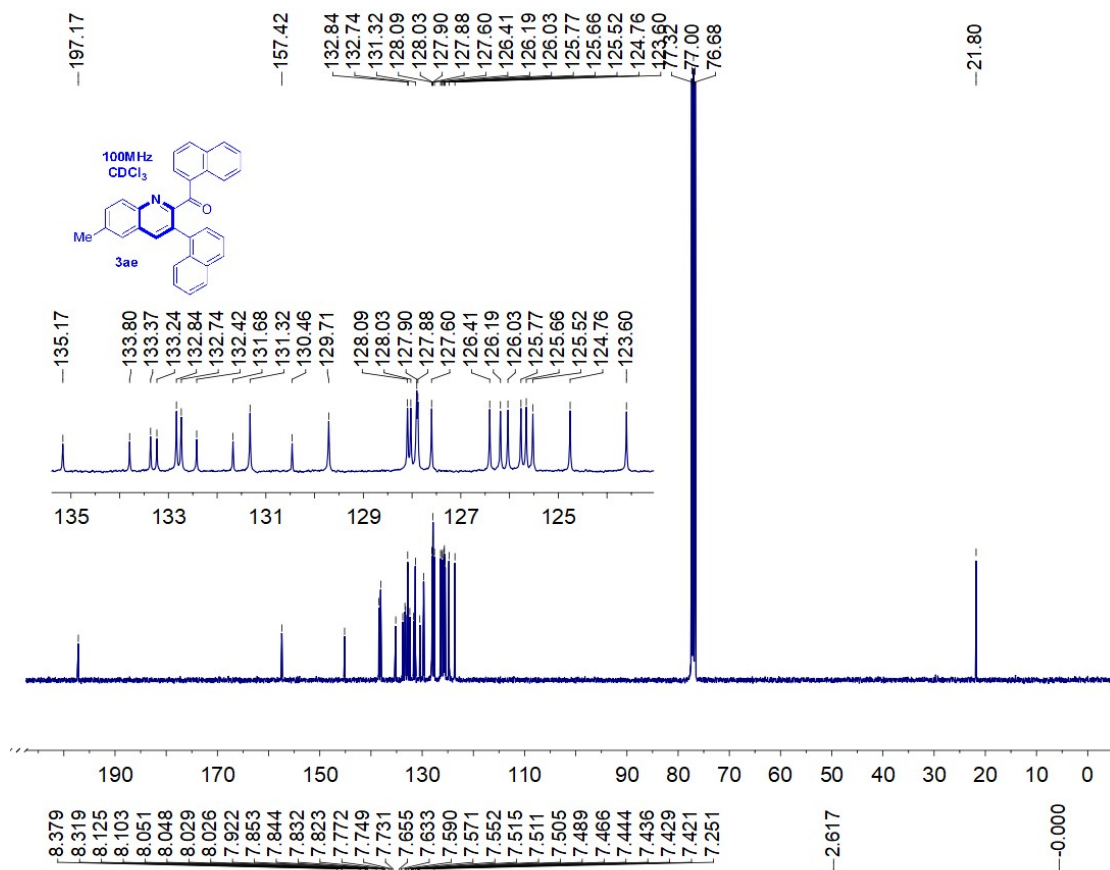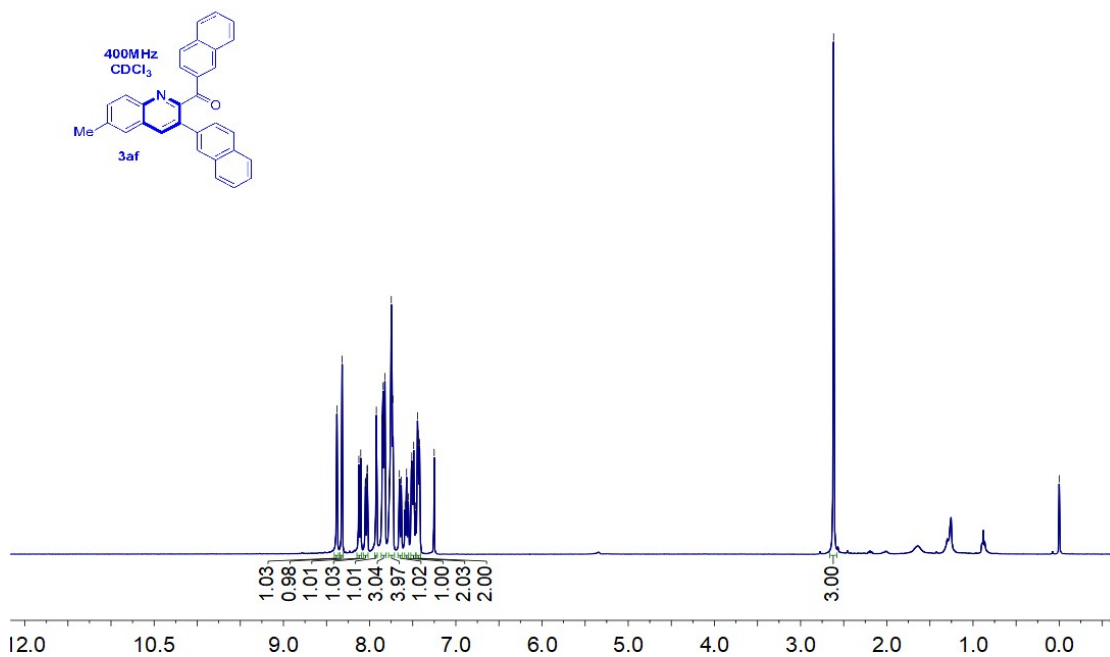

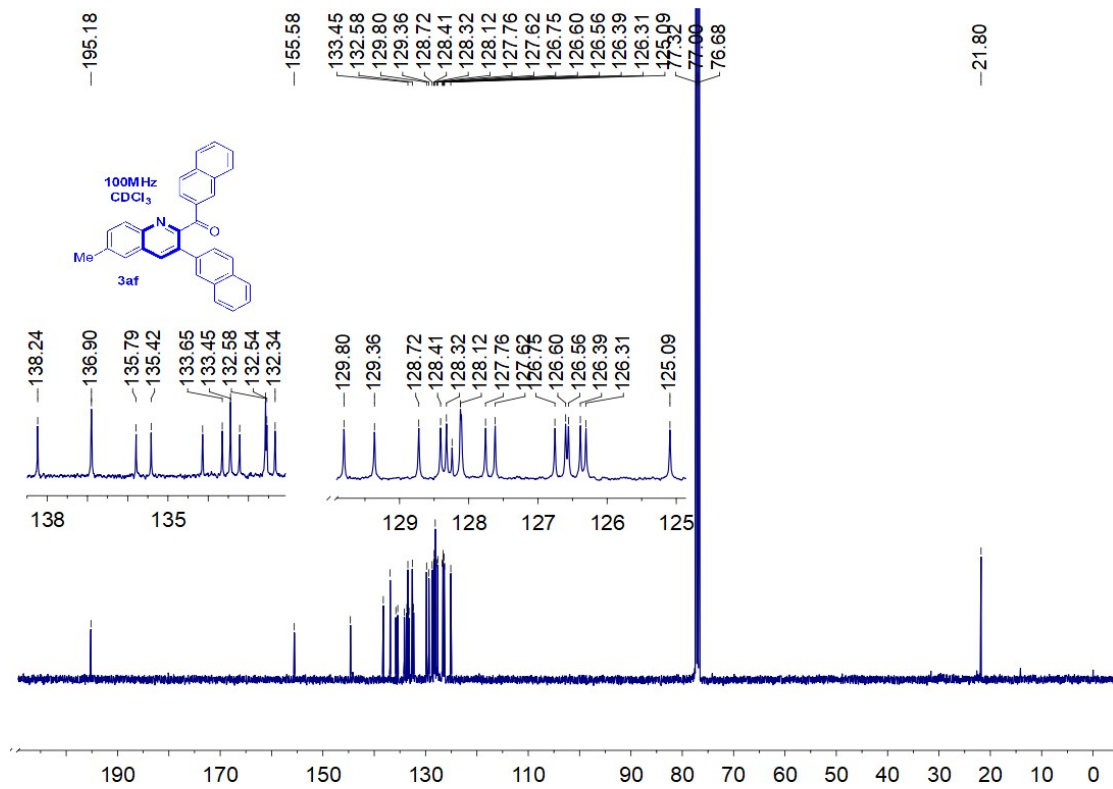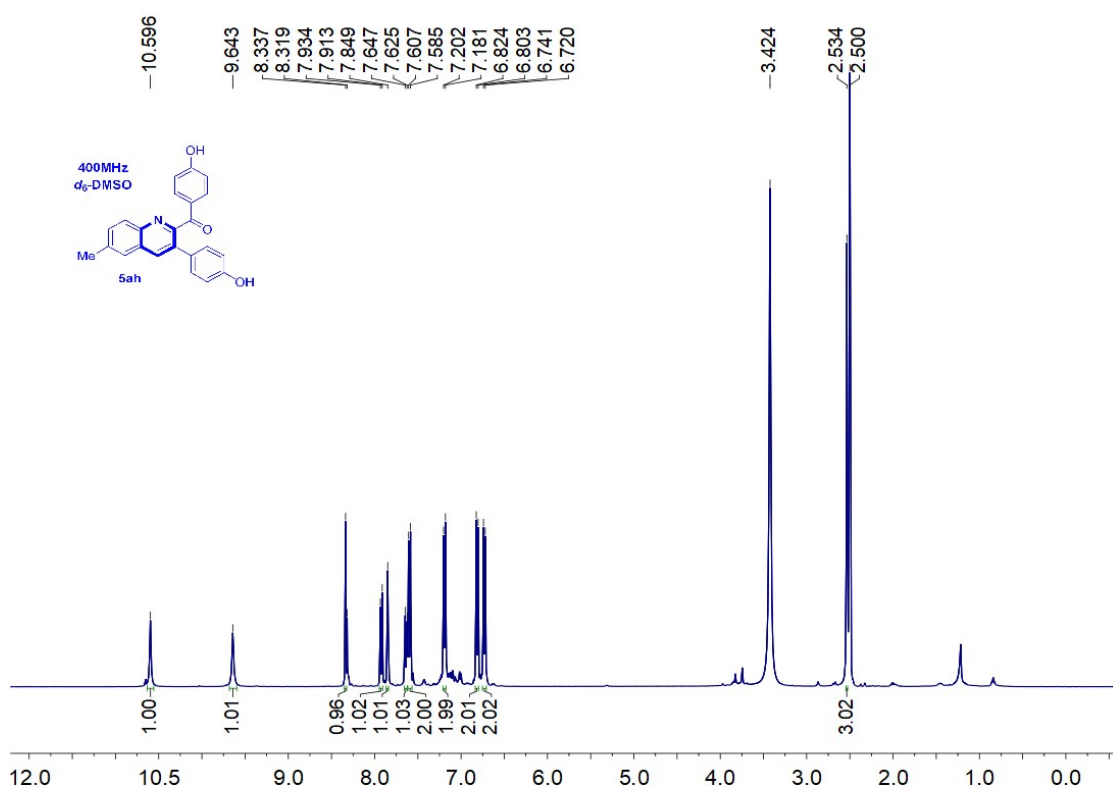

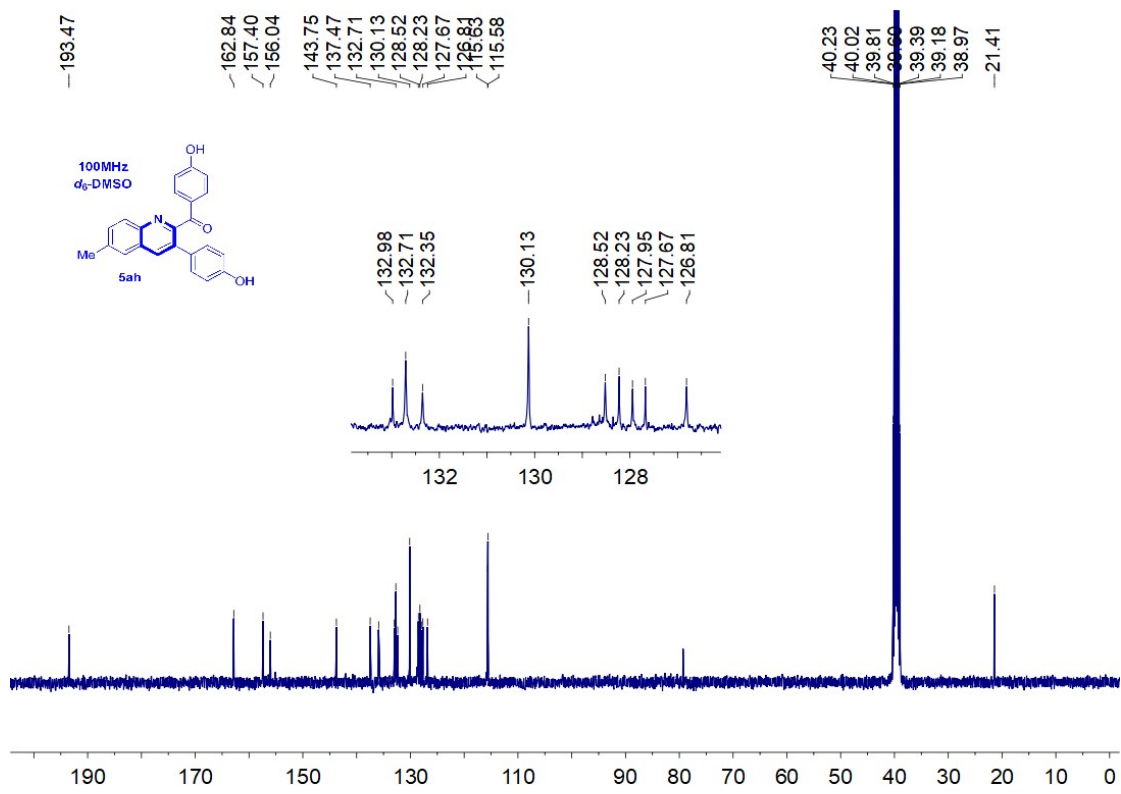

Supplement: d2ob02283d1.pdf [file d2ob02283d1.pdf]
